# Supplementary material
Source: publisher figshare collection journal article supplement (https://acs.figshare.com/ndownloader/files/4324660)

# Supporting Information

(Revised February 9, 2011)

## Total Synthesis of ( $\pm$ )-Lysergic Acid, Lysergol, and Isolysergol by Palladium-Catalyzed Domino Cyclization of Amino Allenes Bearing a Bromoindolyl Group

Shinsuke Inuki, Shinya Oishi, Nobutaka Fujii,\* and Hiroaki Ohno\*

*Graduate School of Pharmaceutical Sciences, Kyoto University, Sakyo-ku,  
Kyoto 606-8501, Japan*

*E-mail: hohno@pharm.kyoto-u.ac.jp; n-fujii@pharm.kyoto-u.ac.jp*

### Table of Contents

|                            |    |
|----------------------------|----|
| Experimental Section ..... | 2  |
| NMR Spectra .....          | 20 |

## Experimental Section

**General Methods.** All moisture-sensitive reaction were performed using syringe-septum cap techniques under an argon atmosphere and all glassware was dried in an oven at 80 °C for 2 h prior to use. Reactions at –78 °C employed a CO<sub>2</sub>–MeOH bath. Melting points were measured by a hot stage melting point apparatus and are uncorrected. For flash chromatography, Wakosil C-300 was employed. <sup>1</sup>H NMR spectra were recording using a JEOR AL-400 or JEOL ECA-500 spectrometer, and chemical shifts are reported in δ (ppm) relative to TMS (in CDCl<sub>3</sub>) as internal standard. <sup>13</sup>C NMR spectra were recorded using a JEOR AL-400 or JEOL ECA-500 spectrometer and referenced to the residual CHCl<sub>3</sub> signal. NOE spectra were recorded on 500 MHz instruments. Chemical shifts were reported in parts per million with the residual solvent peak used as an internal standard. <sup>1</sup>H NMR spectra are tabulated as follows: chemical shift, multiplicity (b = broad, s = singlet, d = doublet, t = triplet, q = quartet, m = multiplet), number of protons, and coupling constant(s). Exact mass (HRMS) spectra were recorded on a JMS-HX/HX 110A mass spectrometer. Infrared (IR) spectra were obtained on a JASCO FT/IR-4100 FT-IR spectrometer with JASCO ATR PRO410-S. Microwave reaction was conducted in a sealed glass vessel (capacity 10 mL) using CEM Discover microwave reactor. The temperature was monitored using IR sensor mounted under the reaction vessel. For analytical HPLC, a Cosmosil 5C18-ARII column (4.6 × 250 mm, Nacalai Tesque Inc., Kyoto, Japan) was employed on a Shimadzu LC-10ADvp (Shimadzu Corp., Ltd., Kyoto, Japan). Preparative HPLC was performed using a Cosmosil 5C18-ARII column (20 × 250 mm, Nacalai Tesque Inc.) on a Shimadzu LC-6AD (Shimadzu Corp., Ltd.).

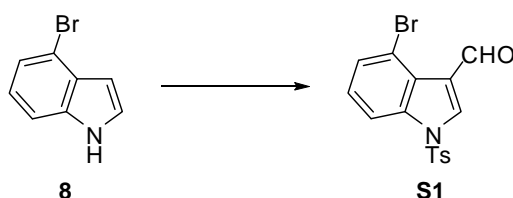

**4-Bromo-1-tosyl-1H-indole-3-carbaldehyde (S1).** The formylation of 4-bromoindole was carried out according to the method of Shea.<sup>1</sup> To a stirred DMF (6 mL) was added POCl<sub>3</sub> (0.98 mL, 10.5 mmol) at 0 °C under argon. The solution was stirred for 2 min, and then 4-bromoindole (940 mg, 4.7 mmol) in DMF (5 mL) was added. The mixture was stirred for 1 h neatoom temperature and was slowly quenched with KOH (2.66 g) in water (10 mL). The reaction mixture was left to cool overnight, and was then partitioned between EtOAc and saturated aqueous NaHCO<sub>3</sub>. The organic layer was washed with brine, dried over MgSO<sub>4</sub>, and concentrated under reduced pressure to give off a crude aldehyde as a white solid. To a stirred solution of this aldehyde in CH<sub>2</sub>Cl<sub>2</sub> (40 mL) were added TsCl (1.08 g, 5.6 mmol), Et<sub>3</sub>N (1.05 mL, 7.5 mmol) and DMAP (57.4 mg, 0.47 mmol) at 0 °C, and the mixture was stirred for 2 h at room temperature. The mixture was made acidic with 1N HCl, and whole was extracted with EtOAc. The extract was washed with brine, dried over

MgSO<sub>4</sub>, and concentrated under pressure to give a white solid, which was purified by column chromatography over silica gel with *n*-hexane–EtOAc (7:1) to give **S1** (1.59 g, 90% yield). Recrystallization from *n*-hexane–chloroform gave essentially pure **S1** as colorless crystals: mp 176 °C; IR (neat): 1676 (C=O), 1381 (NSO<sub>2</sub>), 1176 (NSO<sub>2</sub>); <sup>1</sup>H NMR (500 MHz, CDCl<sub>3</sub>) δ 2.38 (s, 3H), 7.24 (dd, *J* = 8.2, 8.2 Hz, 1H), 7.30 (d, *J* = 8.3 Hz, 2H), 7.54 (d, *J* = 8.2 Hz, 1H), 7.83 (d, *J* = 8.3 Hz, 2H), 8.00 (d, *J* = 8.2 Hz, 1H), 8.41 (s, 1H), 10.29 (s, 1H); <sup>13</sup>C NMR (100 MHz, CDCl<sub>3</sub>) δ 21.7, 112.9, 113.9, 122.0, 126.1, 127.0, 127.3 (2C), 128.9, 130.4 (2C), 132.0, 134.1, 136.2, 146.4, 186.2. *Anal.* Calcd for C<sub>16</sub>H<sub>12</sub>BrNO<sub>3</sub>S: C, 50.81; H, 3.20; N, 3.70. Found: C, 50.81; H, 3.16; N, 3.71.

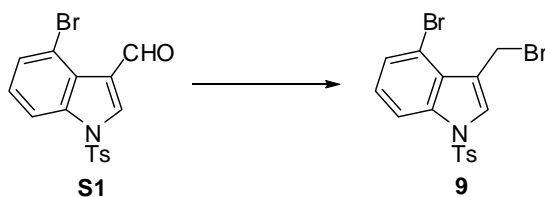

**4-Bromo-3-(bromomethyl)-1-tosyl-1H-indole (9).** To a stirred solution of the aldehyde **S1** (4.30 g, 11.4 mmol) in MeOH (300 mL) was added NaBH<sub>4</sub> (1.24 g, 32.7 mmol) at 0 °C. After stirring for 1.5 h at room temperature, H<sub>2</sub>O was added, and the mixture was concentrated under reduced pressure. The residue was diluted with Et<sub>2</sub>O, and the organic phase was separated and washed with brine and dried over MgSO<sub>4</sub>. The filtrate was concentrated under reduced pressure to give a crude alcohol as a white solid, which was used without further purification. To a stirred solution of this alcohol in CH<sub>2</sub>Cl<sub>2</sub> (60 mL) was added Ph<sub>3</sub>PBr<sub>2</sub> (5.30 g, 12.5 mmol) in CH<sub>2</sub>Cl<sub>2</sub> (50 mL). The mixture was stirred overnight at room temperature. Concentration under reduced pressure gave an oily residue, which was purified by flash chromatography over silica gel with *n*-hexane–EtOAc (7:1) to give **9** (4.46 g, 89% yield). Recrystallization from *n*-hexane–chloroform gave pure **9** as colorless crystals: mp 157 °C; IR (neat): 1375 (NSO<sub>2</sub>), 1173 (NSO<sub>2</sub>); <sup>1</sup>H NMR (500 MHz, CDCl<sub>3</sub>) δ 2.36 (s, 3H), 4.88 (s, 2H), 7.17 (dd, *J* = 8.1, 8.1 Hz, 1H), 7.26 (d, *J* = 8.0 Hz, 2H), 7.42 (d, *J* = 8.1 Hz, 1H), 7.75 (s, 1H), 7.76 (d, *J* = 8.0 Hz, 2H), 7.93 (d, *J* = 8.1 Hz, 1H); <sup>13</sup>C NMR (100 MHz, CDCl<sub>3</sub>) δ 21.6, 24.7, 112.9, 114.2, 119.6, 126.1, 127.0 (2C), 127.1, 127.9, 128.2, 130.1 (2C), 134.7, 136.3, 145.6. *Anal.* Calcd for C<sub>16</sub>H<sub>13</sub>Br<sub>2</sub>NO<sub>2</sub>S: C, 43.36; H, 2.96; N, 3.16. Found: C, 43.57; H, 2.75; N, 2.90.

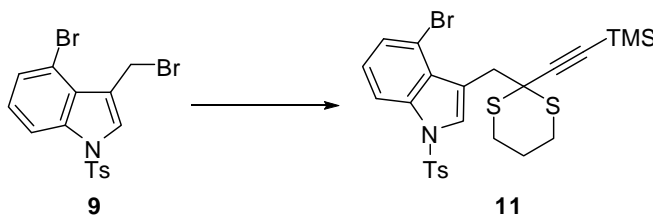

**4-Bromo-1-tosyl-3-[2-(trimethylsilylethynyl)-1,3-dithian-2-yl]methyl-1H-indole (11).** To a stirred solution of the 2-(trimethylsilylethynyl)-1,3-dithiane **10** (38.3 mg, 0.177 mmol) in THF (1

mL) was added *n*-BuLi (1.65 M solution in hexane; 0.12 mL, 0.195 mmol) at  $-40\text{ }^{\circ}\text{C}$  under argon. After stirring for 1 h with warming to  $-20\text{ }^{\circ}\text{C}$ , a solution of the bromide **9** (72.5 mg, 0.164 mmol) in THF (0.2 mL) was added to this reagent at  $-20\text{ }^{\circ}\text{C}$ . The mixture was stirred for 2 h at this temperature and quenched with  $\text{H}_2\text{O}$ . The whole was extracted with  $\text{Et}_2\text{O}$ . The extract was washed with brine and dried over  $\text{MgSO}_4$ . The filtrate was concentrated under reduced pressure to give an oily residue, which was purified by flash chromatography over silica gel with *n*-hexane– $\text{EtOAc}$  (7:1) to give **11** (90.6 mg, 96% yield). Recrystallization from MeCN gave pure **11** as colorless crystals: mp  $138\text{ }^{\circ}\text{C}$ ; IR (neat): 2157 ( $\text{C}\equiv\text{C}$ ), 1374 ( $\text{NSO}_2$ ), 1173 ( $\text{NSO}_2$ );  $^1\text{H}$  NMR (500 MHz,  $\text{CDCl}_3$ )  $\delta$  0.05 (s, 9H), 1.82–1.92 (m, 1H), 2.14–2.21 (m, 1H), 2.33 (s, 3H), 2.83 (ddd,  $J = 13.9, 3.3, 3.3\text{ Hz}$ , 2H), 3.29–3.37 (m, 2H), 3.78 (s, 2H), 7.07 (dd,  $J = 8.0, 8.0\text{ Hz}$ , 1H), 7.18 (d,  $J = 8.2\text{ Hz}$ , 2H), 7.36 (d,  $J = 8.0\text{ Hz}$ , 1H), 7.72 (d,  $J = 8.2\text{ Hz}$ , 2H), 7.91 (d,  $J = 8.0\text{ Hz}$ , 1H), 7.94 (s, 1H);  $^{13}\text{C}$  NMR (125 MHz,  $\text{CDCl}_3$ )  $\delta$  0.00 (3C), 21.8, 25.8, 29.1 (2C), 36.7, 47.1, 93.1, 103.2, 113.1, 115.0, 116.1, 125.3, 127.2 (2C), 128.4, 128.6, 129.5, 130.1 (2C), 135.2, 136.1, 145.2. *Anal.* Calcd for  $\text{C}_{25}\text{H}_{28}\text{BrNO}_2\text{S}_3\text{Si}$ : C, 51.89; H, 4.88; N, 2.42. Found: C, 51.66; H, 4.78; N, 2.24.

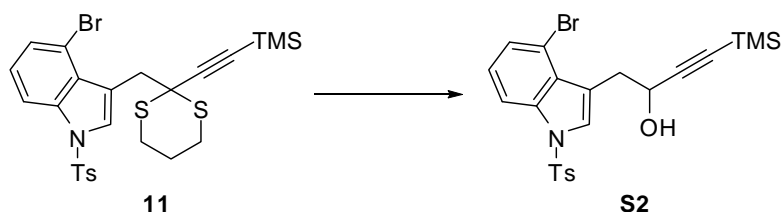

(±)-1-(4-Bromo-1-tosyl-1H-indol-3-yl)-4-(trimethylsilyl)but-3-yn-2-ol (**S2**). To a stirred mixture of NCS (786 mg, 5.89 mmol) and  $\text{AgNO}_3$  (1.03 g, 6.06 mmol) in MeCN (25 mL) and  $\text{H}_2\text{O}$  (5 mL) was added thioacetal **11** (1.00 g, 1.73 mmol) in MeCN (8 mL) at  $0\text{ }^{\circ}\text{C}$ . The mixture was stirred for 5 min at this temperature and quenched with saturated  $\text{Na}_2\text{SO}_3$ , saturated  $\text{NaHCO}_3$  and brine (1:1:1). The mixture was filtered through a short pad of celite with  $\text{EtOAc}$ . The filtrate was extracted with  $\text{Et}_2\text{O}$ . The extract was washed with saturated  $\text{Na}_2\text{SO}_3$ , saturated  $\text{NaHCO}_3$  and brine (1:1:1), brine and dried over  $\text{MgSO}_4$ . The filtrate was concentrated under reduced pressure to give a yellow oily residue, which was used without further purification. To a stirred solution of the crude ketone in MeOH (50 mL) was added  $\text{CeCl}_3\cdot 7\text{H}_2\text{O}$  (838 mg, 2.25 mmol) at room temperature. After stirring for 10 min,  $\text{NaBH}_4$  (118 mg, 3.11 mmol) was added to this solution at  $-20\text{ }^{\circ}\text{C}$ . The mixture was stirred for 1 h at this temperature and quenched with  $\text{H}_2\text{O}$ . The mixture was concentrated under reduced pressure. The residue was diluted with  $\text{Et}_2\text{O}$ , and the extract was washed with brine and dried over  $\text{MgSO}_4$ . The filtrate was concentrated under reduced pressure to give an oily residue, which was purified by flash chromatography over silica gel with *n*-hexane– $\text{EtOAc}$  (4:1) to give **S2** as a white amorphous solid (530 mg, 63% yield): IR (neat): 3540 (OH), 2172 ( $\text{C}\equiv\text{C}$ ), 1373 ( $\text{NSO}_2$ ), 1173 ( $\text{NSO}_2$ );  $^1\text{H}$  NMR (500 MHz,  $\text{CDCl}_3$ )  $\delta$  0.16 (s, 9H), 1.90 (d,  $J = 5.1\text{ Hz}$ , 1H), 2.35 (s, 3H), 3.33 (dd,  $J = 14.0, 6.8\text{ Hz}$ , 1H), 3.42 (dd,  $J = 14.0, 6.8\text{ Hz}$ , 1H), 4.72 (ddd,  $J = 6.8, 6.8, 5.1\text{ Hz}$ , 1H), 7.11 (dd,  $J = 8.0, 8.0\text{ Hz}$ , 1H), 7.23 (d,  $J = 8.4\text{ Hz}$ , 2H), 7.37 (d,  $J = 8.0\text{ Hz}$ , 1H), 7.59 (s, 1H), 7.73 (d,



$J = 8.4$  Hz, 2H), 7.94 (d,  $J = 8.0$  Hz, 1H);  $^{13}\text{C}$  NMR (125 MHz,  $\text{CDCl}_3$ )  $\delta$  0.00 (3C), 21.8, 34.6, 63.1, 90.8, 105.9, 113.1, 114.6, 117.8, 125.5, 127.1 (2C), 127.2, 128.1, 128.9, 130.2 (2C), 135.2, 136.5, 145.4; HRMS (FAB) calcd  $\text{C}_{22}\text{H}_{23}\text{BrNO}_3\text{SSi}$ :  $[\text{M} - \text{H}]^-$ , 488.0357; found:  $[\text{M} - \text{H}]^-$ , 488.0351.

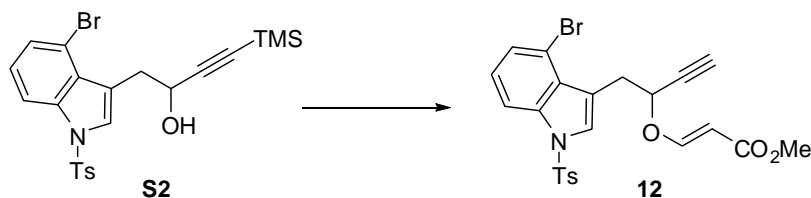

**Methyl ( $\pm$ )-(E)-3-[1-(4-Bromo-1-tosyl-1H-indol-3-yl)but-3-yn-2-yloxy]acrylate (**12**).** To a stirred solution of the alcohol **S2** (84.2 mg, 0.17 mmol) in THF (3 mL) was added TBAF (1.00 M solution in THF; 0.22 mL, 0.22 mmol) at 0 °C. The mixture was stirred for 1 h at this temperature and quenched with  $\text{H}_2\text{O}$ . The whole was extracted with EtOAc. The extract was washed with  $\text{H}_2\text{O}$ , brine and dried over  $\text{MgSO}_4$ . The filtrate was concentrated under reduced pressure to give a pale yellow amorphous solid, which was used without further purification. To a stirred solution of this amorphous solid in  $\text{Et}_2\text{O}$  (1.5 mL) were added methyl propiolate (0.028 mL, 0.31 mmol) and  $\text{Et}_3\text{N}$  (0.043 mL, 0.31 mmol) at room temperature. The mixture was stirred overnight at room temperature. Concentration under pressure gave an oily residue, which was purified by flash chromatography over silica gel with *n*-hexane–EtOAc (4:1) to give **12** as a white amorphous solid (78.9 mg, 92% yield): IR (neat): 2122 ( $\text{C}\equiv\text{C}$ ), 1709 ( $\text{C}=\text{O}$ ), 1625 ( $\text{C}=\text{C}$ ), 1373 ( $\text{NSO}_2$ ), 1173 ( $\text{NSO}_2$ );  $^1\text{H}$  NMR (400 MHz,  $\text{CDCl}_3$ )  $\delta$  2.35 (s, 3H), 2.59 (d,  $J = 2.1$  Hz, 1H), 3.47 (dd,  $J = 13.9$ , 6.8 Hz, 1H), 3.53 (dd,  $J = 13.9$ , 6.8 Hz, 1H), 3.70 (s, 3H), 4.90 (ddd,  $J = 6.8$ , 6.8, 2.1 Hz, 1H), 5.38 (d,  $J = 12.4$  Hz, 1H), 7.14 (dd,  $J = 8.0$ , 8.0 Hz, 1H), 7.22 (d,  $J = 8.3$  Hz, 2H), 7.39 (d,  $J = 8.0$  Hz, 1H), 7.55 (s, 1H), 7.57 (d,  $J = 12.4$  Hz, 1H), 7.71 (d,  $J = 8.3$  Hz, 2H), 7.97 (d,  $J = 8.0$  Hz, 1H);  $^{13}\text{C}$  NMR (125 MHz,  $\text{CDCl}_3$ )  $\delta$  21.5, 32.2, 51.2, 71.0, 76.8, 79.6, 99.1, 113.1, 114.0, 116.2, 125.6, 126.8 (2C), 127.5, 127.9, 128.2, 130.0 (2C), 134.7, 136.4, 145.4, 159.9, 167.7; HRMS (FAB) calcd  $\text{C}_{23}\text{H}_{19}\text{BrNO}_5\text{S}$ :  $[\text{M} - \text{H}]^-$ , 500.0173; found:  $[\text{M} - \text{H}]^-$ , 500.0174.

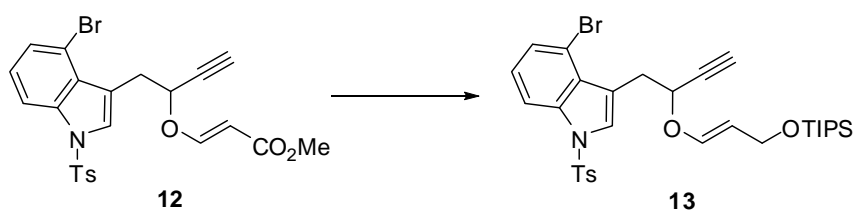

**( $\pm$ )-(E)-4-Bromo-1-tosyl-3-{2-[3-(triisopropylsilyloxy)prop-1-enyloxy]but-3-ynyl}-1H-indole (**13**).** To a stirred solution of the enol ether **12** (200 mg, 0.40 mmol) in  $\text{Et}_2\text{O}$  (6.5 mL) was added DIBAL-H (0.99 M solution in toluene; 1.0 mL, 1.0 mmol) at  $-78$  °C. The mixture was stirred for 50 min at this temperature and quenched with 2N Rochelle salt. After stirring for 1.5 h, the whole was extracted with  $\text{Et}_2\text{O}$ . The extract was washed with brine and dried over  $\text{MgSO}_4$ . The filtrate was

concentrated under reduced pressure to give a crude alcohol as a white amorphous solid, which was used without further purification. To a stirred solution of this alcohol in DMF (2.0 mL) were added imidazole (81.7 mg, 1.2 mmol) and TIPSCl (0.127 mL, 0.60 mmol) at 0 °C. After stirring overnight at room temperature, the mixture was diluted with Et<sub>2</sub>O. The organic phase was separated and washed with H<sub>2</sub>O, brine and dried over MgSO<sub>4</sub>. The filtrate was concentrated under reduced pressure to give an oily residue, which was purified by flash chromatography over silica gel with *n*-hexane–EtOAc (15:1) to give **13** as a colorless oil (239 mg, 95% yield): IR (neat): 2116 (C≡C), 1665 (C=C), 1369 (NSO<sub>2</sub>), 1173 (NSO<sub>2</sub>); <sup>1</sup>H NMR (500 MHz, CDCl<sub>3</sub>) δ 1.04–1.09 (m, 21H), 2.34 (s, 3H), 2.48 (d, *J* = 2.3 Hz, 1H), 3.37 (dd, *J* = 13.7, 6.9 Hz, 1H), 3.52 (dd, *J* = 13.7, 6.9 Hz, 1H), 4.19 (d, *J* = 6.3 Hz, 2H), 4.75 (ddd, *J* = 6.9, 6.9, 2.3 Hz, 1H), 5.19 (dt, *J* = 12.0, 6.3 Hz, 1H), 6.48 (d, *J* = 12.0 Hz, 1H), 7.11 (dd, *J* = 8.3, 8.3 Hz, 1H), 7.21 (d, *J* = 8.0 Hz, 2H), 7.37 (d, *J* = 8.3 Hz, 1H), 7.57 (s, 1H), 7.72 (d, *J* = 8.0 Hz, 2H), 7.95 (d, *J* = 8.3 Hz, 1H); <sup>13</sup>C NMR (125 MHz, CDCl<sub>3</sub>) δ 12.1 (3C), 18.0 (6C), 21.6, 32.4, 61.0, 69.2, 75.3, 81.2, 107.2, 113.0, 114.2, 117.1, 125.4, 126.9 (2C), 127.3, 127.9, 128.6, 129.9 (2C), 134.9, 136.3, 145.2, 145.5; HRMS (FAB) calcd C<sub>31</sub>H<sub>39</sub>BrNO<sub>4</sub>SSi: [M – H]<sup>–</sup>, 628.1558; found: [M – H]<sup>–</sup>, 628.1555.

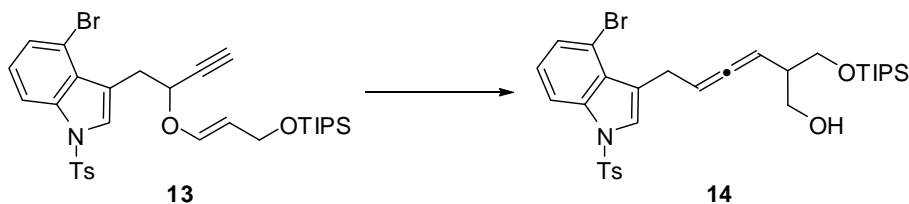

(±)-(2*S*,*aR*)-6-(4-Bromo-1-tosyl-1*H*-indol-3-yl)-2-(triisopropylsilyloxymethyl)hexa-3,4-dien-1-ol (**14a**) and (±)-(2*R*,*aR*)-Isomer (**14b**).

**Microwave conditions (Table 1, entry 2):** A solution of the silyl enol ether **13** (31 mg, 0.049 mmol) in CHCl<sub>3</sub> was heated under microwave irradiation at 120 °C for 12 min, then 150 °C for 12 min. The mixture was diluted with MeOH (0.4 mL), NaBH<sub>4</sub> (2.2 mg, 0.059 mmol) was added at room temperature. The mixture was stirred for 1 h at room temperature. Concentration under pressure gave an oily residue, which was purified by flash chromatography over silica gel with *n*-hexane–EtOAc (5:1) to give **14** as a colorless oil (25.4 mg, 82% yield, **a:b** = *ca.* 33:67).

**Au-Catalyzed conditions (Table 1, entry 3):** To a stirred solution of the silyl enol ether **13** (50 mg, 0.079 mmol) in CH<sub>2</sub>Cl<sub>2</sub> (0.25 mL) was added [(Ph<sub>3</sub>PAu)<sub>3</sub>O]BF<sub>4</sub> (4.3 mg, 0.004 mmol) at room temperature. After stirring for 7.5 h at 40 °C, the mixture was diluted with MeOH (0.5 mL). NaBH<sub>4</sub> (3.6 mg, 0.095 mmol) was added at room temperature, and the mixture was stirred for 1 h at room temperature. Concentration under pressure gave an oily residue, which was purified by flash chromatography over silica gel with *n*-hexane–EtOAc (5:1) to give **14** as a colorless oil (39.1 mg, 78% yield, **a:b** = *ca.* 80:20). Both diastereomers were isolated by HPLC [5C18-ARII column, 254 nm, MeCN:H<sub>2</sub>O = 86:14, 8 mL/min; for analytical HPLC: 1 mL/min, *t*<sub>1</sub> = 48.25 min (minor isomer), *t*<sub>2</sub> = 49.80 min (major isomer)].

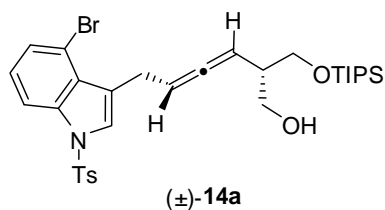

**14a**: IR (neat): 3456 (OH), 1963 (C=C=C), 1374 (NSO<sub>2</sub>), 1173 (NSO<sub>2</sub>); <sup>1</sup>H NMR (500 MHz, CDCl<sub>3</sub>) δ 1.07-1.10 (m, 21H), 2.34 (s, 3H), 2.39-2.46 (m, 1H), 2.59 (dd, *J* = 6.3, 5.2 Hz, 1H), 3.52-3.72 (m, 5H), 3.78 (dd, *J* = 9.7, 4.6 Hz, 1H), 5.02 (ddd, *J* = 9.7, 6.3, 2.9 Hz, 1H), 5.45 (ddd, *J* = 13.1, 6.3, 2.3 Hz, 1H), 7.11 (dd, *J* = 8.5, 8.0 Hz, 1H), 7.23 (d, *J* = 8.6 Hz, 2H), 7.36 (dd, *J* = 8.0, 1.1 Hz, 1H), 7.44 (s, 1H), 7.73 (d, *J* = 8.6 Hz, 2H), 7.95 (dd, *J* = 8.5, 1.1 Hz, 1H); <sup>13</sup>C NMR (125 MHz, CDCl<sub>3</sub>) δ 11.8 (3C), 17.9 (6C), 21.6, 26.5, 42.7, 65.9, 66.8, 89.8, 90.8, 112.9, 114.5, 121.8, 125.1, 125.4, 126.8 (2C), 127.7, 128.7, 129.9 (2C), 134.9, 136.5, 145.1, 204.7; HRMS (FAB) calcd C<sub>31</sub>H<sub>41</sub>BrNO<sub>4</sub>SSi: [M – H]<sup>–</sup>, 630.1714; found: [M – H]<sup>–</sup>, 630.1707.

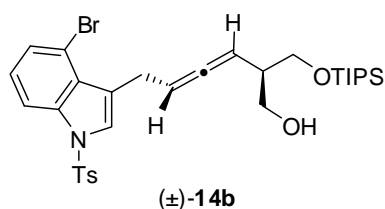

**14b**: IR (neat): 3441 (OH), 1963 (C=C=C), 1375 (NSO<sub>2</sub>), 1173 (NSO<sub>2</sub>); <sup>1</sup>H NMR (500 MHz, CDCl<sub>3</sub>) δ 1.02-1.07 (m, 21H), 2.35 (s, 3H), 2.38-2.46 (m, 1H), 2.60-2.67 (m, 1H), 3.55-3.72 (m, 5H), 3.78 (dd, *J* = 9.7, 4.0 Hz, 1H), 5.06 (ddd, *J* = 9.7, 6.3, 2.9 Hz, 1H), 5.44 (ddd, *J* = 13.2, 6.3, 2.3 Hz, 1H), 7.11 (dd, *J* = 8.0, 8.0 Hz, 1H), 7.23 (d, *J* = 8.6 Hz, 2H), 7.36 (d, *J* = 8.0 Hz, 1H), 7.43 (s, 1H), 7.73 (d, *J* = 8.6 Hz, 2H), 7.95 (d, *J* = 8.0 Hz, 1H); <sup>13</sup>C NMR (125 MHz, CDCl<sub>3</sub>) δ 11.8 (3C), 17.9 (6C), 21.6, 26.5, 42.6, 66.0, 66.9, 89.8, 90.9, 112.9, 114.5, 121.8, 125.1, 125.4, 126.8 (2C), 127.7, 128.7, 129.9 (2C), 135.0, 136.5, 145.2, 204.7; HRMS (FAB) calcd C<sub>31</sub>H<sub>41</sub>BrNO<sub>4</sub>SSi: [M – H]<sup>–</sup>, 630.1714; found: [M – H]<sup>–</sup>, 630.1705.

### Determination of Relative Configuration of **14a**:<sup>2,3</sup>

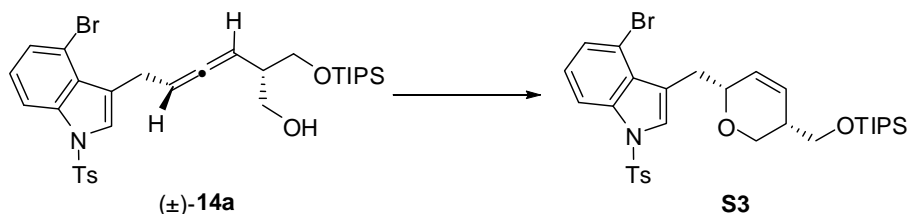

**(±)-4-Bromo-1-tosyl-3-[(2*R*,5*S*)-5-(triisopropylsilyloxymethyl)-5,6-dihydro-2*H*-pyran-2-yl]methyl-1*H*-indole (S3)**. To a stirred suspension of AgBF<sub>4</sub> (3.1 mg, 0.016 mmol) in toluene (2.5 mL) was added Ph<sub>3</sub>PAuCl (7.8 mg, 0.016 mmol) at room temperature. After stirring rapidly for 5 min, the resulting mixture was filtered through a cotton plug. To a solution of allenol **14a** (20 mg, 0.032 mmol) in toluene (0.25 mL) was added the above filtrate (0.25 mL) at room temperature. The

resulting mixture was stirred for 8.5 h at this temperature. Concentration under pressure gave an oily residue, which was purified by flash chromatography over silica gel with *n*-hexane–EtOAc (15:1) to give **S3** as a colorless oil (12.5 mg, 63% yield): IR (neat): 1598 (C=C), 1375 (NSO<sub>2</sub>), 1173 (NSO<sub>2</sub>); <sup>1</sup>H NMR (500 MHz, C<sub>6</sub>D<sub>6</sub>) δ 1.11–1.18 (m, 21H), 1.64 (s, 3H), 2.09–2.16 (br m, 1H), 3.16 (d, *J* = 6.3 Hz, 2H), 3.56 (dd, *J* = 11.2, 3.7 Hz, 1H), 3.72 (dd, *J* = 9.2, 5.4 Hz, 1H), 3.82 (dd, *J* = 9.2, 9.2 Hz, 1H), 4.15 (d, *J* = 11.2 Hz, 1H), 4.37–4.42 (m, 1H), 5.64 (d, *J* = 10.6 Hz, 1H), 5.70 (dd, *J* = 10.6, 4.3 Hz, 1H), 6.50 (d, *J* = 8.6 Hz, 2H), 6.71 (dd, *J* = 8.0, 8.0 Hz, 1H), 7.15 (d, *J* = 8.0 Hz, 1H), 7.61 (d, *J* = 8.6 Hz, 2H), 7.72 (s, 1H), 8.12 (d, *J* = 8.0 Hz, 1H); <sup>13</sup>C NMR (125 MHz, CDCl<sub>3</sub>) δ 12.0 (3C), 18.1 (6C), 21.6, 32.1, 38.3, 64.4, 73.5, 77.2, 113.0, 114.5, 119.4, 125.2, 126.4, 126.6, 126.9 (2C), 127.9, 129.0, 129.9 (2C), 131.0, 135.0, 136.5, 145.1; HRMS (FAB) calcd C<sub>31</sub>H<sub>41</sub>BrNO<sub>4</sub>SSi: [M + H]<sup>+</sup>, 630.1714; found: [M + H]<sup>+</sup>, 630.1711.

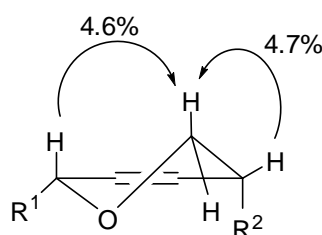

Selected NOE cross peaks for pyran **S3**

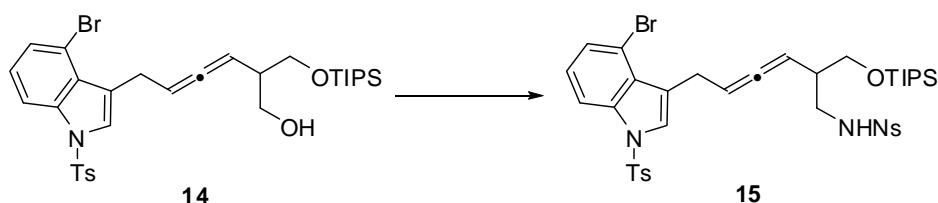

***N*-(2*S*,*aR*)-6-(4-Bromo-1-tosyl-1*H*-indol-3-yl)-2-(triisopropylsilyloxymethyl)hexa-3,4-dienyl]-2-nitrobenzenesulfonamide (15a) and Its (±)-(*2R*,*aR*)-Isomer (15b).** To a stirred mixture of the allenol **14** (*a:b* = *ca.* 80:20) (300 mg, 0.48 mmol), NsNH<sub>2</sub> (317 mg, 1.57 mmol) and PPh<sub>3</sub> (630 mg, 2.40 mmol) in benzene (18 mL) was added diethyl azodicarboxylate (40% solution in toluene; 1.10 mL, 2.40 mmol) at room temperature, and the mixture was stirred for 1.5 h at this temperature. Concentration under pressure gave an oily residue, which was purified by flash chromatography over silica gel with *n*-hexane–EtOAc (3:1) to give **15** as a pale yellow amorphous solid (276 mg, 70% yield, *a:b* = 80:20).

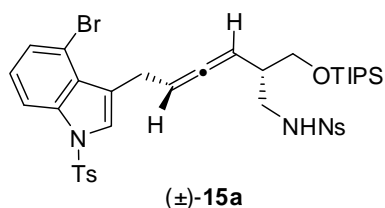

**15a** (major): IR (neat): 1962 (C=C=C), 1540 (NO<sub>2</sub>), 1372 (NSO<sub>2</sub>), 1172 (NSO<sub>2</sub>); <sup>1</sup>H NMR (500

MHz, CDCl<sub>3</sub>)  $\delta$ 0.99-1.07 (m, 21H), 2.35 (s, 3H), 2.36-2.42 (m, 1H), 3.05 (ddd,  $J = 12.6, 6.3, 5.1$  Hz, 1H), 3.27 (ddd,  $J = 12.6, 6.3, 5.3$  Hz, 1H), 3.39 (dd,  $J = 10.3, 8.0$  Hz, 1H), 3.56-3.70 (m, 2H), 3.61 (dd,  $J = 10.3, 4.6$  Hz, 1H), 5.04 (ddd,  $J = 9.7, 6.3, 2.9$  Hz, 1H), 5.49 (ddd,  $J = 13.2, 6.3, 2.3$  Hz, 1H), 5.67 (t,  $J = 6.3$  Hz, 1H), 7.10 (dd,  $J = 8.0, 8.0$  Hz, 1H), 7.23 (d,  $J = 8.6$  Hz, 2H), 7.34 (d,  $J = 8.0$  Hz, 1H), 7.38 (s, 1H), 7.64-7.70 (m, 2H), 7.72 (d,  $J = 8.6$  Hz, 2H), 7.79 (dd,  $J = 7.4, 1.7$  Hz, 1H), 7.94 (d,  $J = 8.0$  Hz, 1H), 8.09 (dd,  $J = 7.2, 2.0$  Hz, 1H); <sup>13</sup>C NMR (125 MHz, CDCl<sub>3</sub>)  $\delta$ 11.8 (3C), 18.0 (6C), 21.6, 26.5, 41.5, 45.2, 65.1, 90.1, 91.8, 112.9, 114.4, 121.7, 125.0, 125.2, 125.5, 126.8 (2C), 127.7, 128.6, 130.0 (2C), 131.0, 132.6, 133.4, 133.8, 134.9, 136.5, 145.3, 148.0, 204.5; HRMS (FAB) calcd C<sub>37</sub>H<sub>45</sub>BrN<sub>3</sub>O<sub>7</sub>S<sub>2</sub>Si: [M – H]<sup>–</sup>, 814.1657; found: [M – H]<sup>–</sup>, 814.1662.

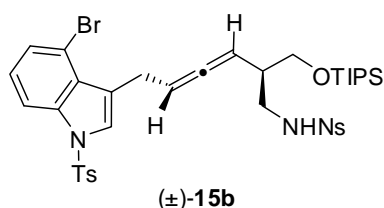

**15b** (minor): IR (neat): 1963 (C=C=C), 1541 (NO<sub>2</sub>), 1372 (NSO<sub>2</sub>), 1172 (NSO<sub>2</sub>); <sup>1</sup>H NMR (500 MHz, CDCl<sub>3</sub>)  $\delta$ 0.99-1.05 (m, 21H), 2.31-2.34 (m, 1H), 2.35 (s, 3H), 3.10 (ddd,  $J = 12.6, 6.3, 5.7$  Hz, 1H), 3.30 (ddd,  $J = 12.6, 6.3, 6.3$  Hz, 1H), 3.40 (dd,  $J = 9.7, 7.4$  Hz, 1H), 3.61 (dd,  $J = 9.7, 4.9$  Hz, 1H), 3.61-3.64 (m, 2H), 5.00 (ddd,  $J = 9.7, 6.9, 3.4$  Hz, 1H), 5.41 (ddd,  $J = 13.2, 6.9, 1.7$  Hz, 1H), 5.65 (t,  $J = 6.3$  Hz, 1H), 7.10 (dd,  $J = 8.0, 8.0$  Hz, 1H), 7.24 (d,  $J = 8.0$  Hz, 2H), 7.34 (d,  $J = 8.0$  Hz, 1H), 7.38 (s, 1H), 7.61-7.69 (m, 2H), 7.73 (d,  $J = 8.0$  Hz, 2H), 7.77 (dd,  $J = 7.6, 1.1$  Hz, 1H), 7.94 (d,  $J = 8.0$  Hz, 1H), 8.09 (dd,  $J = 7.4, 1.7$  Hz, 1H); <sup>13</sup>C NMR (125 MHz, CDCl<sub>3</sub>)  $\delta$ 11.8 (3C), 18.0 (6C), 21.6, 26.4, 41.6, 45.5, 65.1, 90.0, 91.5, 112.9, 114.5, 121.6, 125.1, 125.2, 125.4, 126.8 (2C), 127.7, 128.7, 130.0 (2C), 131.0, 132.6, 133.3, 133.8, 134.9, 136.5, 145.3, 148.0, 204.8; HRMS (FAB) calcd C<sub>37</sub>H<sub>45</sub>BrN<sub>3</sub>O<sub>7</sub>S<sub>2</sub>Si: [M – H]<sup>–</sup>, 814.1657; found: [M – H]<sup>–</sup>, 814.1655.

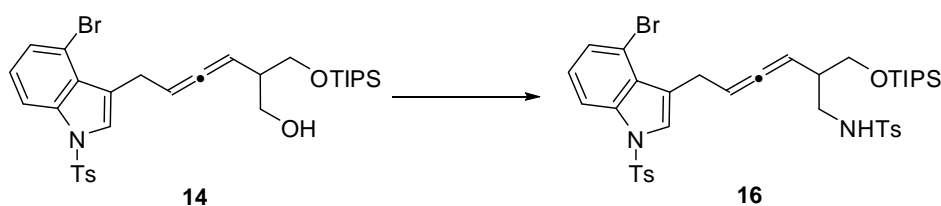

(±)-*N*-[(2*S*,*aR*)-6-(4-Bromo-1-tosyl-1*H*-indol-3-yl)-2-(triisopropylsilyloxymethyl)hexa-3,4-dienyl]-4-methylbenzenesulfonamide (**16a**) and Its (±)-(*2R*,*aR*)-Isomer (**16b**). To a stirred mixture of the allenol **14** (**a**:**b** = *ca.* 80:20; 150 mg, 0.24 mmol), FmocNHTs (308 mg, 0.78 mmol) and PPh<sub>3</sub> (312 mg, 1.19 mmol) in THF (4 mL) was added diethyl azodicarboxylate (0.54 mL, 1.19 mmol; 40% solution in toluene) at 0 °C, and the mixture was stirred for 3 h at room temperature. Concentration under pressure gave an oily residue, which was dissolved in DMF (7 mL). Piperidine (94  $\mu$ L, 0.95 mmol) was added to the mixture at 0 °C. After stirring for 50 min at room temperature, the mixture was diluted with Et<sub>2</sub>O and washed with H<sub>2</sub>O, brine and dried over MgSO<sub>4</sub>. The filtrate

was concentrated under reduced pressure to give an oily residue, which was purified by flash chromatography over silica gel with *n*-hexane–EtOAc (2:1) to give **16** as a yellow amorphous solid (136 mg, 73% yield, **a:b** = *ca.* 80:20).

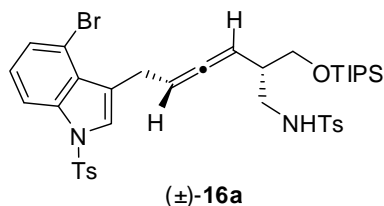

**16a** (major): IR (neat): 1964 (C=C=C), 1374 (NSO<sub>2</sub>), 1173 (NSO<sub>2</sub>); <sup>1</sup>H NMR (500 MHz, CDCl<sub>3</sub>) δ 0.98-1.04 (m, 21H), 2.29-2.34 (m, 1H), 2.34 (s, 3H), 2.40 (s, 3H), 2.98 (dd, *J* = 6.0, 6.0 Hz, 1H), 3.00 (dd, *J* = 6.0, 6.0 Hz, 1H), 3.36 (dd, *J* = 10.0, 8.3 Hz, 1H), 3.60 (dd, *J* = 10.0, 4.3 Hz, 1H), 3.60-3.64 (m, 2H), 4.96 (ddd, *J* = 9.1, 6.3, 2.9 Hz, 1H), 5.14 (t, *J* = 6.0 Hz, 1H), 5.44 (ddd, *J* = 13.2, 6.3, 2.3 Hz, 1H), 7.10 (dd, *J* = 8.0, 8.0 Hz, 1H), 7.23 (d, *J* = 8.6 Hz, 2H), 7.28 (d, *J* = 8.6 Hz, 2H), 7.34 (d, *J* = 8.0 Hz, 1H), 7.41 (s, 1H), 7.70-7.74 (m, 4H), 7.94 (d, *J* = 8.0 Hz, 1H); <sup>13</sup>C NMR (125 MHz, CDCl<sub>3</sub>) δ 11.7 (3C), 17.9 (6C), 21.5, 21.6, 26.4, 40.5, 45.9, 66.4, 90.2, 91.6, 112.9, 114.4, 121.6, 125.1, 125.5, 126.8 (2C), 127.1 (2C), 127.7, 128.6, 129.6 (2C), 130.0 (2C), 134.9, 136.5, 137.0, 143.2, 145.2, 204.5; HRMS (FAB) calcd C<sub>38</sub>H<sub>48</sub>BrN<sub>2</sub>O<sub>5</sub>S<sub>2</sub>Si: [M – H]<sup>–</sup>, 783.1963; found: [M – H]<sup>–</sup>, 783.1960.

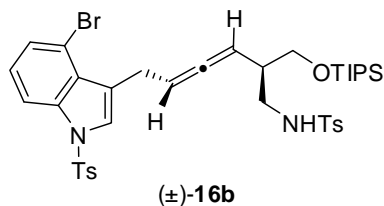

**16b** (minor): IR (neat): 1964 (C=C=C), 1374 (NSO<sub>2</sub>), 1173 (NSO<sub>2</sub>); <sup>1</sup>H NMR (500 MHz, CDCl<sub>3</sub>) δ 0.94-1.04 (m, 21H), 2.27-2.33 (m, 1H), 2.35 (s, 3H), 2.41 (s, 3H), 2.99 (ddd, *J* = 6.3, 6.3, 1.7 Hz, 1H), 3.01 (ddd, *J* = 6.3, 6.3, 1.7 Hz, 1H), 3.35 (dd, *J* = 10.0, 7.7 Hz, 1H), 3.60 (dd, *J* = 10.0, 4.3 Hz, 1H), 3.61-3.65 (m, 2H), 4.94 (ddd, *J* = 9.7, 6.3, 2.9 Hz, 1H), 5.11 (t, *J* = 6.3 Hz, 1H), 5.42 (ddd, *J* = 13.2, 6.3, 2.3 Hz, 1H), 7.10 (dd, *J* = 8.2, 8.2 Hz, 1H), 7.23 (d, *J* = 8.0 Hz, 2H), 7.28 (d, *J* = 8.0 Hz, 2H), 7.35 (d, *J* = 8.2 Hz, 1H), 7.41 (s, 1H), 7.71 (d, *J* = 8.0 Hz, 2H), 7.73 (d, *J* = 8.0 Hz, 2H), 7.94 (d, *J* = 8.2 Hz, 1H); <sup>13</sup>C NMR (125 MHz, CDCl<sub>3</sub>) δ 11.7 (3C), 17.9 (6C), 21.5, 21.6, 26.3, 40.5, 46.0, 66.4, 90.2, 91.5, 112.9, 114.4, 121.5, 125.1, 125.4, 126.8 (2C), 127.1 (2C), 127.7, 128.6, 129.6 (2C), 130.0 (2C), 134.9, 136.5, 137.0, 143.2, 145.2, 204.6; HRMS (FAB) calcd C<sub>38</sub>H<sub>48</sub>BrN<sub>2</sub>O<sub>5</sub>S<sub>2</sub>Si: [M – H]<sup>–</sup>, 783.1963; found: [M – H]<sup>–</sup>, 783.1968.

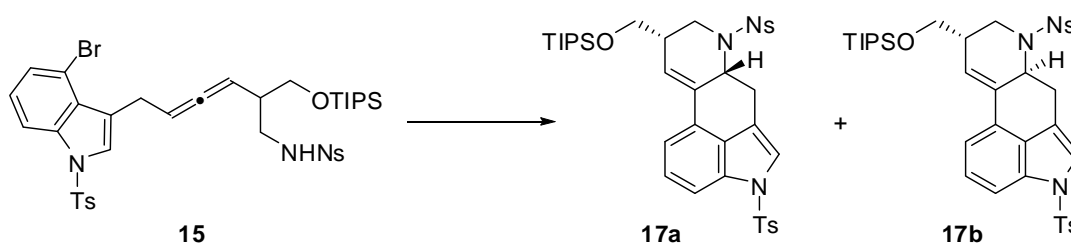

(±)-(6a*R*,9*S*)-7-(2-Nitrophenylsulfonyl)-4-tosyl-9-(triisopropylsilyloxymethyl)-4,6,6a,7,8,9-hexahydroindolo[4,3-*fg*]quinoline (**17a**) and Its (±)-(6a*S*,9*S*)-Isomer (**17b**) (Table 2, Entry 3). To a stirred mixture of allenamide **15** (**a:b** = 80:20; 30 mg, 0.037 mmol) in DMF (0.6 mL) were added Pd(PPh<sub>3</sub>)<sub>4</sub> (2.1 mg, 0.0018 mmol) and K<sub>2</sub>CO<sub>3</sub> (15 mg, 0.11 mmol) at room temperature under argon, and the mixture was stirred for 3.5 h at 100 °C. The mixture was diluted with Et<sub>2</sub>O and washed with H<sub>2</sub>O, brine and dried over MgSO<sub>4</sub>. The filtrate was concentrated under reduced pressure to give a yellow oil which was purified by flash chromatography over silica gel with *n*-hexane–EtOAc (5:1) to give **17** as a yellow amorphous solid (22.3 mg, 83% yield, **a:b** = 73:27). Both diastereomers were isolated by PTLTC with hexane–*i*-Pr<sub>2</sub>O (3:1).

**17a** (major): IR (neat): 1596 (C=C), 1544 (NO<sub>2</sub>), 1359 (NSO<sub>2</sub>), 1178 (NSO<sub>2</sub>); <sup>1</sup>H NMR (500 MHz, CDCl<sub>3</sub>) δ 0.97-1.04 (m, 21H), 2.36 (s, 3H), 2.40-2.48 (br m, 1H), 2.95 (dd, *J* = 13.7, 10.9 Hz, 1H), 2.99 (ddd, *J* = 14.9, 12.0, 2.3 Hz, 1H), 3.27 (dd, *J* = 14.9, 5.2 Hz, 1H), 3.55 (dd, *J* = 9.7, 8.0 Hz, 1H), 3.69 (dd, *J* = 9.7, 5.7 Hz, 1H), 4.10 (dd, *J* = 13.7, 5.2 Hz, 1H), 4.75-4.80 (m, 1H), 6.16 (s, 1H), 7.18-7.21 (m, 2H), 7.23-7.30 (m, 3H), 7.60-7.65 (m, 2H), 7.66-7.71 (m, 1H), 7.78 (d, *J* = 8.0 Hz, 2H), 7.79 (d, *J* = 7.4 Hz, 1H), 8.04 (dd, *J* = 8.0, 1.1 Hz, 1H); <sup>13</sup>C NMR (125 MHz, CDCl<sub>3</sub>) δ 11.8 (3C), 17.9 (6C), 21.6, 29.7, 38.2, 43.0, 54.1, 64.9, 112.7, 115.6, 117.3, 120.5, 124.0, 124.3, 125.8, 126.8 (2C), 128.2, 130.0 (2C), 130.2, 131.0, 131.8, 133.4, 133.5, 133.6, 133.8, 135.4, 144.9, 147.9; HRMS (FAB) calcd C<sub>37</sub>H<sub>44</sub>N<sub>3</sub>O<sub>7</sub>S<sub>2</sub>Si: [M – H]<sup>–</sup>, 734.2395; found: [M – H]<sup>–</sup>, 734.2392.

**17b** (minor): IR (neat): 1597 (C=C), 1542 (NO<sub>2</sub>), 1359 (NSO<sub>2</sub>), 1174 (NSO<sub>2</sub>); <sup>1</sup>H NMR (500 MHz, CDCl<sub>3</sub>) δ 0.94-1.01 (m, 21H), 2.36 (s, 3H), 2.53-2.58 (br m, 1H), 2.99 (ddd, *J* = 14.3, 12.0, 2.3 Hz, 1H), 3.12 (dd, *J* = 14.3, 5.0 Hz, 1H), 3.33 (dd, *J* = 9.7, 8.0 Hz, 1H), 3.35 (dd, *J* = 13.7, 3.4 Hz, 1H), 3.48 (dd, *J* = 9.7, 6.9 Hz, 1H), 3.97 (d, *J* = 13.7 Hz, 1H), 4.74 (dd, *J* = 12.0, 5.0 Hz, 1H), 6.31 (d, *J* = 5.2 Hz, 1H), 7.15 (d, *J* = 2.3 Hz, 1H), 7.18 (d, *J* = 6.9 Hz, 1H), 7.24 (d, *J* = 8.6 Hz, 2H), 7.28 (dd, *J* = 8.0, 8.0 Hz, 1H), 7.62-7.72 (m, 3H), 7.76 (d, *J* = 8.6 Hz, 2H), 7.78 (d, *J* = 8.0 Hz, 1H), 8.14 (dd, *J* = 7.4, 1.7 Hz, 1H); <sup>13</sup>C NMR (125 MHz, CDCl<sub>3</sub>) δ 11.9 (3C), 18.0 (6C), 21.6, 28.7, 39.5, 40.3, 53.9, 63.9, 112.7, 115.7, 117.2, 120.4, 123.1, 124.3, 125.8, 126.8 (2C), 128.2, 130.0 (2C), 130.6, 131.4, 131.9, 133.3, 133.6, 134.0, 134.1, 135.4, 144.9, 147.8; HRMS (FAB) calcd C<sub>37</sub>H<sub>44</sub>N<sub>3</sub>O<sub>7</sub>S<sub>2</sub>Si: [M – H]<sup>–</sup>, 734.2395; found: [M – H]<sup>–</sup>, 734.2392.

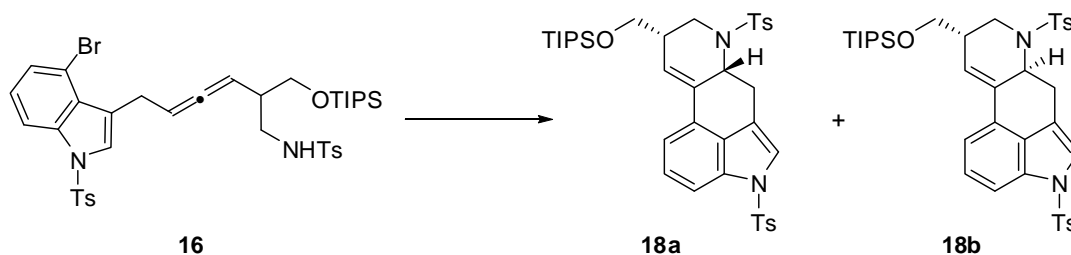

(±)-(6a*R*,9*S*)-4,7-Ditosyl-9-(triisopropylsilyloxymethyl)-4,6,6a,7,8,9-hexahydroindolo[4,3-*fg*]quinoline (**18a**) and Its (±)-(6a*S*,9*S*)-Isomer (**18b**) (Table 2, Entry 12). To a stirred mixture of allenamide **16** (**a:b** = *ca.* 80:20; 30 mg, 0.038 mmol) in DMF (0.6 mL) were added Pd(PPh<sub>3</sub>)<sub>4</sub> (2.2 mg, 0.0019 mmol) and K<sub>2</sub>CO<sub>3</sub> (15.8 mg, 0.11 mmol) at room temperature under argon, and the mixture was stirred for 3 h at 120 °C. The mixture was diluted with Et<sub>2</sub>O and washed with H<sub>2</sub>O, brine and dried over MgSO<sub>4</sub>. The filtrate was concentrated under reduced pressure to give a yellow oil which was purified by flash chromatography over silica gel with *n*-hexane–EtOAc (6:1) to give **18** as a white amorphous solid (17.3 mg, 65% yield, **a:b** = 87:13). Both diastereomers were isolated by PTLC with hexane–*i*-Pr<sub>2</sub>O (1:1).

**18a** (major): IR (neat): 1598 (C=C), 1376 (NSO<sub>2</sub>), 1178 (NSO<sub>2</sub>); <sup>1</sup>H NMR (500 MHz, CDCl<sub>3</sub>) δ 0.95-1.05 (m, 21H), 2.12-2.19 (br m, 1H), 2.35 (s, 3H), 2.39 (s, 3H), 2.84 (dd, *J* = 13.7, 10.6 Hz, 1H), 2.92 (ddd, *J* = 14.0, 12.0, 1.7 Hz, 1H), 3.33 (dd, *J* = 14.0, 5.4 Hz, 1H), 3.46 (dd, *J* = 9.6, 8.6 Hz, 1H), 3.63 (dd, *J* = 9.6, 5.4 Hz, 1H), 4.11 (dd, *J* = 13.7, 5.2 Hz, 1H), 4.67-4.73 (m, 1H), 6.07 (s, 1H), 7.15 (d, *J* = 7.4 Hz, 1H), 7.20-7.28 (m, 6H), 7.67 (d, *J* = 8.0 Hz, 2H), 7.77 (d, *J* = 8.0 Hz, 2H), 7.78 (d, *J* = 7.4 Hz, 1H); <sup>13</sup>C NMR (125 MHz, CDCl<sub>3</sub>) δ 11.9 (3C), 17.9 (6C), 21.5, 21.6, 30.0, 37.3, 42.9, 53.6, 65.0, 112.7, 115.5, 117.7, 120.5, 124.0, 125.7, 126.8 (2C), 126.9 (2C), 128.3, 129.8 (2C), 129.9 (2C), 130.2, 133.3, 133.4, 135.5, 138.0, 143.3, 144.8; HRMS (FAB) calcd C<sub>38</sub>H<sub>49</sub>N<sub>2</sub>O<sub>5</sub>S<sub>2</sub>Si: [M + H]<sup>+</sup>, 705.2852; found: [M + H]<sup>+</sup>, 705.2850.

**18b** (minor): IR (neat): 1598 (C=C), 1377 (NSO<sub>2</sub>), 1173 (NSO<sub>2</sub>), <sup>1</sup>H NMR (500 MHz, CDCl<sub>3</sub>) δ 0.99-1.05 (m, 21H), 2.35 (s, 3H), 2.40 (s, 3H), 2.49-2.55 (br m, 1H), 2.87 (ddd, *J* = 14.3, 12.0, 1.7 Hz, 1H), 3.21 (dd, *J* = 13.2, 3.7 Hz, 1H), 3.30-3.39 (m, 3H), 3.89 (d, *J* = 13.2 Hz, 1H), 4.64 (dd, *J* = 11.5, 4.6 Hz, 1H), 6.29 (d, *J* = 5.2 Hz, 1H), 7.13 (d, *J* = 7.4 Hz, 1H), 7.18 (s, 1H), 7.22-7.29 (m, 5H), 7.72 (d, *J* = 8.0 Hz, 2H), 7.77 (d, *J* = 8.0 Hz, 2H), 7.78 (d, *J* = 8.0 Hz, 1H); <sup>13</sup>C NMR (125 MHz, CDCl<sub>3</sub>) δ 11.9 (3C), 18.0 (6C), 21.5, 21.6, 28.4, 39.5, 39.9, 53.7, 64.3, 112.7, 115.6, 117.6, 120.5, 123.6, 125.8, 126.8 (2C), 127.1 (2C), 128.3, 129.7 (2C), 129.9 (2C), 130.7, 133.3, 134.1, 135.5, 138.1, 143.2, 144.8; HRMS (FAB) calcd C<sub>38</sub>H<sub>49</sub>N<sub>2</sub>O<sub>5</sub>S<sub>2</sub>Si: [M + H]<sup>+</sup>, 705.2852; found: [M + H]<sup>+</sup>, 705.2849.



### Determination of Relative Configuration of 18a:

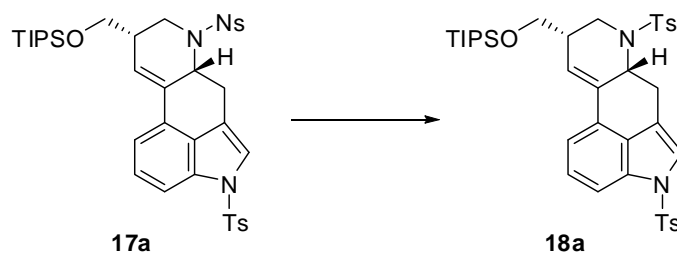

To a stirred mixture of **17a** (25 mg, 0.034 mmol) in DMF (0.2 mL) were added LiOH·H<sub>2</sub>O (14.3 mg 0.34 mmol) and HSCH<sub>2</sub>CO<sub>2</sub>H (11.8 μL, 0.17 mmol) at 0 °C. After stirring for 1 h at room temperature, the mixture was diluted with EtOAc was washed with saturated NaHCO<sub>3</sub>, brine and dried over MgSO<sub>4</sub>. The filtrate was concentrated under reduced pressure to give a crude amine as an oily residue, which was used without further purification. To a stirred solution of this amine in CH<sub>2</sub>Cl<sub>2</sub> (0.25 mL) were added Et<sub>3</sub>N (14.2 μL, 0.102 mmol) and TsCl (9.7 mg, 0.051 mmol) at 0 °C. After stirring for 2 h at room temperature, the mixture was diluted with EtOAc and washed with H<sub>2</sub>O, brine and dried over MgSO<sub>4</sub>. The filtrate was concentrated under reduced pressure to give an oily residue, which was purified by flash chromatography over silica gel with *n*-hexane–EtOAc (6:1) to give **18a** as a white amorphous solid (18.1 mg, 76% yield).

### Determination of Relative Configuration of 18b:

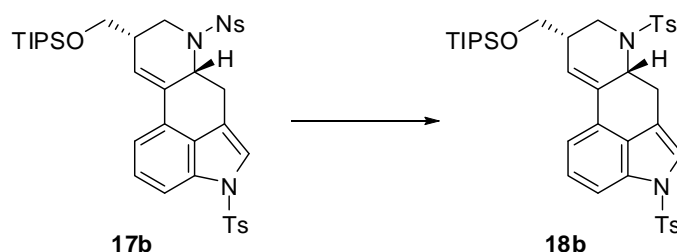

By a procedure identical with that described for synthesis of **18a** from **17a**, the nosylamide **17b** (24 mg, 0.033 mmol) was converted into **18b** as a white amorphous solid (13.8 mg, 59% yield).

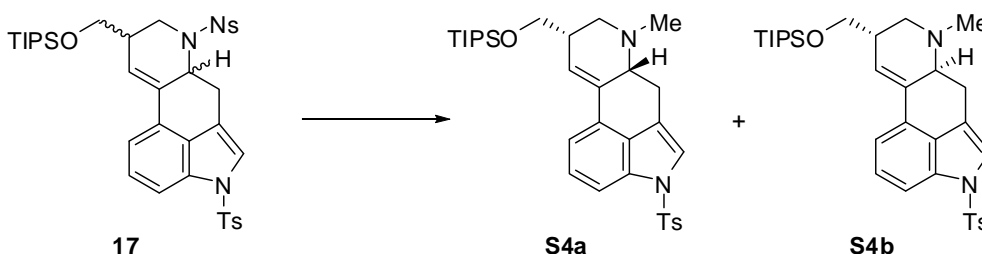

(±)-(6a*R*,9*S*)-7-Methyl-4-tosyl-9-(triisopropylsilyloxymethyl)-4,6,6a,7,8,9-hexahydroindolo[4,3-*fg*]quinoline (**S4a**) and Its (±)-(6a*S*,9*S*)-Isomer (**S4b**). To a stirred mixture of **17** (a:b = 74:26) (136 mg, 0.19 mmol) in DMF (1.1 mL) were added LiOH·H<sub>2</sub>O (78 mg 1.9 mmol) and HSCH<sub>2</sub>CO<sub>2</sub>H (64 μL, 0.92 mmol) at 0 °C. After stirring for 1 h at room temperature, the mixture was diluted with

EtOAc and washed with saturated NaHCO<sub>3</sub>, brine and dried over MgSO<sub>4</sub>. The filtrate was concentrated under reduced pressure to give a crude amine as an oily residue, which was used without further purification. To a stirred solution of this amine in DMF (2.0 mL) were added K<sub>2</sub>CO<sub>3</sub> (41 mg, 0.30 mmol) and MeI (15  $\mu$ L, 0.24 mmol) at 0 °C. After stirring for 5 h at room temperature, the mixture was diluted with EtOAc and washed with saturated NaHCO<sub>3</sub>, brine and dried over MgSO<sub>4</sub>. The filtrate was concentrated under reduced pressure to give an oily residue, which was purified by flash chromatography over silica gel with *n*-hexane–EtOAc (5:1 to 3:1) to give **S4a** (53.4 mg, 52% yield) and **S4b** (16.7 mg, 16% yield) both as a brown amorphous solid.

**S4a**: IR (neat): 1599 (C=C), 1379 (NSO<sub>2</sub>), 1177 (NSO<sub>2</sub>), <sup>1</sup>H NMR (500 MHz, CDCl<sub>3</sub>)  $\delta$  1.03-1.09 (m, 21H), 2.33 (s, 3H), 2.46 (s, 3H), 2.48-2.53 (m, 3H), 2.95-3.04 (m, 2H), 3.37 (dd, *J* = 15.4, 5.4 Hz, 1H), 3.72 (dd, *J* = 9.3, 5.2 Hz, 1H), 3.78 (dd, *J* = 9.3, 9.0 Hz, 1H), 6.37 (d, *J* = 3.9 Hz, 1H), 7.16-7.21 (m, 1H), 7.19 (d, *J* = 8.3 Hz, 2H), 7.23-7.29 (m, 2H), 7.72-7.76 (m, 1H), 7.74 (d, *J* = 8.3 Hz, 2H); <sup>13</sup>C NMR (125 MHz, CDCl<sub>3</sub>)  $\delta$  12.0 (3C), 18.0 (6C), 21.5, 27.2, 39.2, 43.7, 53.0, 62.2, 65.0, 112.2, 116.1, 118.4, 119.7, 123.2, 125.8, 126.7 (2C), 128.6, 129.8 (2C), 129.9, 133.5, 135.0, 135.5, 144.6; HRMS (FAB) calcd C<sub>32</sub>H<sub>43</sub>N<sub>2</sub>O<sub>3</sub>SSi: [M – H]<sup>–</sup>, 563.2769; found: [M – H]<sup>–</sup>, 563.2770.

**S4b**: IR (neat): 1599 (C=C), 1379 (NSO<sub>2</sub>), 1178 (NSO<sub>2</sub>), <sup>1</sup>H NMR (500 MHz, CDCl<sub>3</sub>)  $\delta$  1.05-1.09 (m, 21H), 2.22 (dd, *J* = 10.7, 10.7 Hz, 1H), 2.33 (s, 3H), 2.50-2.58 (m, 4H), 2.82-2.93 (m, 1H), 2.98-3.01 (m, 1H), 3.07 (dd, *J* = 11.1, 5.0 Hz, 1H), 3.43 (dd, *J* = 15.1, 5.4 Hz, 1H), 3.65 (dd, *J* = 9.5, 7.6 Hz, 1H), 3.71 (dd, *J* = 9.5, 6.3 Hz, 1H), 6.38 (s, 1H), 7.19 (s, 1H), 7.20 (d, *J* = 8.3 Hz, 2H), 7.24-7.30 (m, 2H), 7.73-7.77 (m, 1H), 7.76 (d, *J* = 8.3 Hz, 2H); <sup>13</sup>C NMR (125 MHz, CDCl<sub>3</sub>)  $\delta$  12.0 (3C), 18.0 (6C), 21.5, 27.0, 39.4, 44.0, 56.8, 62.5, 65.7, 112.2, 116.3, 118.1, 119.7, 123.9, 125.8, 126.7 (2C), 128.5, 129.6, 129.8, 133.5 (2C), 133.8, 135.6, 144.6; HRMS (FAB) calcd C<sub>32</sub>H<sub>43</sub>N<sub>2</sub>O<sub>3</sub>SSi: [M – H]<sup>–</sup>, 563.2769; found: [M – H]<sup>–</sup>, 563.2770.

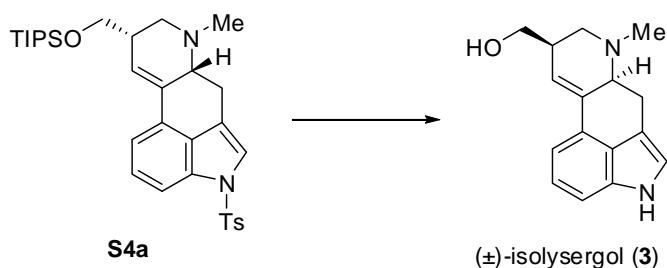

**(±)-Isolysergol (3)**. To a stirred solution of **S4a** (8.3 mg, 0.015 mmol) in THF (0.33 mL) was added TBAF (1.00 M solution in THF; 18  $\mu$ L, 0.018 mmol) at 0 °C. The mixture was stirred for 1 h at room temperature and quenched with H<sub>2</sub>O. The whole was extracted with EtOAc. The extract was washed with H<sub>2</sub>O, brine and dried over MgSO<sub>4</sub>. The filtrate was concentrated under reduced pressure to give a crude alcohol as a brown amorphous solid, which was used without further purification. To a stirred solution of this alcohol in MeOH (0.45 mL) was added Mg (3.6 mg, 0.15 mmol) at room temperature. The mixture was stirred for 2 h at this temperature. Concentration

under pressure gave an oily residue, which was purified by PTLC with EtOAc–MeOH (3:1) to give isolysergol **3** as a pale brown solid (3.8 mg, 99% yield): IR (neat): 3213 (OH), 1604 (C=C), The IR spectra was found to be identical with that of natural isolysergol.<sup>4</sup> <sup>1</sup>H NMR (500 MHz, CDCl<sub>3</sub>–CD<sub>3</sub>OD)  $\delta$  2.44–2.50 (m, 1H), 2.55 (s, 3H), 2.65 (ddd,  $J$  = 14.3, 11.5, 1.7 Hz, 1H), 2.85 (ddd,  $J$  = 11.5, 4.0, 1.7 Hz, 1H), 3.04 (d,  $J$  = 11.5 Hz, 1H), 3.14–3.19 (m, 1H), 3.53 (dd,  $J$  = 14.3, 5.7 Hz, 1H), 3.80 (ddd,  $J$  = 10.3, 3.6, 1.7 Hz, 1H), 3.96 (dd,  $J$  = 10.3, 3.4 Hz, 1H), 6.46 (d,  $J$  = 5.7 Hz, 1H), 6.89 (d,  $J$  = 1.7 Hz, 1H), 7.14–7.17 (m, 2H), 7.18–7.22 (m, 1H); The <sup>1</sup>H NMR spectra was found to be identical with that of synthesized isolysergol reported by Ninomiya and Naito.<sup>5</sup> <sup>13</sup>C NMR (125 MHz, CDCl<sub>3</sub>–CD<sub>3</sub>OD)  $\delta$  27.3, 36.3, 43.3, 57.4, 63.0, 66.0, 109.5, 109.9, 111.7, 118.2, 121.0, 122.9, 126.0, 128.0, 133.8, 136.7; HRMS (FAB) calcd C<sub>16</sub>H<sub>17</sub>N<sub>2</sub>O: [M – H]<sup>–</sup>, 253.1346; found: [M – H]<sup>–</sup>, 253.1352.

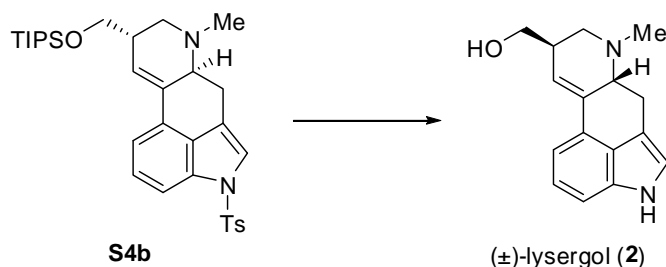

**(±)-Lysergol (2).** To a stirred solution of **S4b** (16.7 mg, 0.030 mmol) in THF (0.7 mL) was added TBAF (1.00 M solution in THF; 39  $\mu$ L, 0.039 mmol) at 0 °C. The mixture was stirred for 1.5 h at room temperature and quenched with H<sub>2</sub>O. The whole was extracted with EtOAc. The extract was washed with H<sub>2</sub>O, brine and dried over MgSO<sub>4</sub>. The filtrate was concentrated under reduced pressure to give a crude alcohol as a brown amorphous solid, which was used without further purification. To a stirred solution of this alcohol in MeOH (0.85 mL) was added Mg (7.3 mg, 0.30 mmol) at room temperature. The mixture was stirred for 3 h at this temperature. Concentration under pressure gave an oily residue, which was purified by PTLC with EtOAc –MeOH (2:1) to give lysergol **2** as a pale brown solid (7.0 mg, 92% yield): IR (neat): 3427 (OH), 1606 (C=C), <sup>1</sup>H NMR (500 MHz, CDCl<sub>3</sub>–CD<sub>3</sub>OD)  $\delta$  2.36 (dd,  $J$  = 10.9, 10.9 Hz, 1H), 2.61 (s, 3H), 2.74 (ddd,  $J$  = 13.7, 12.0, 1.7 Hz, 1H), 2.85–2.93 (m, 1H), 3.17 (dd,  $J$  = 10.9, 5.2 Hz, 1H), 3.23–3.30 (m, 1H), 3.51–3.59 (m, 2H), 3.70 (dd,  $J$  = 10.9, 5.7 Hz, 1H), 6.41 (s, 1H), 6.94 (s, 1H), 7.13–7.18 (m, 2H), 7.20–7.25 (m, 1H); <sup>13</sup>C NMR (125 MHz, CDCl<sub>3</sub>–CD<sub>3</sub>OD)  $\delta$  26.3, 38.1, 43.2, 56.5, 63.1, 64.6, 109.5 (2C), 111.6, 118.4, 121.0, 122.8, 125.8, 127.6, 133.9, 135.0; The IR, <sup>1</sup>H NMR and <sup>13</sup>C NMR spectra were found to be identical with those of natural lysergol. HRMS (FAB) calcd C<sub>16</sub>H<sub>17</sub>N<sub>2</sub>O: [M – H]<sup>–</sup>, 253.1346; found: [M – H]<sup>–</sup>, 253.1349.

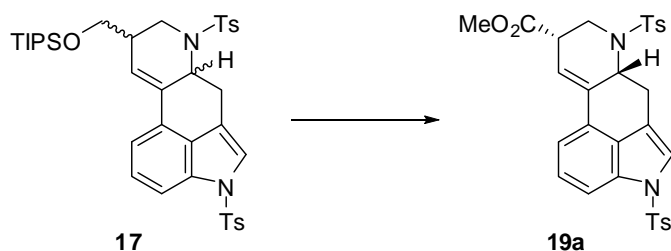

**Methyl (±)-(6a*R*,9*S*)-4,7-ditosyl-4,6,6a,7,8,9-hexahydroindolo[4,3-*fg*]quinoline-9-carboxylate (19a).** To a stirred solution of **17** (a:b = 74:26) (190 mg, 0.27 mmol) in THF (5 mL) was added TBAF (1.00 M solution in THF; 0.32 mL, 0.32 mmol) at 0 °C. The mixture was stirred for 40 min at room temperature and quenched with H<sub>2</sub>O. The whole was extracted with EtOAc. The extract was washed with H<sub>2</sub>O, brine and dried over MgSO<sub>4</sub>. Concentration of the filtrate under reduced pressure followed by filtration through a short pad of SiO<sub>2</sub> with EtOAc give a crude alcohol. To a stirred solution of this alcohol in CH<sub>2</sub>Cl<sub>2</sub> (10 mL) was added Dess-Martin periodinane (230 mg, 0.54 mmol) at 0 °C. After stirring for 30 min at this temperature, the mixture was warming to room temperature. The mixture was stirred for further 1 h at this temperature and filtrated through a short pad of SiO<sub>2</sub> with EtOAc to give a crude aldehyde. To a stirred mixture of the crude aldehyde and 2-methylbut-2-ene (1.66 mL, 16.2 mmol) in a mixed solvent of THF (2.9 mL) and *t*-BuOH (2.9 mL) were added NaClO<sub>2</sub> (117 mg, 1.30 mmol) and NaH<sub>2</sub>PO<sub>4</sub> (155 mg, 1.30 mmol) at room temperature. After stirring for 1.5 h at room temperature, brine was added to the mixture. The whole was extracted with EtOAc. The extract was washed with brine and dried over MgSO<sub>4</sub>. The filtrate was concentrated under reduced pressure to give a crude carboxylic acid. To a stirred solution of this acid in a mixed solvent of toluene (1.7 mL) and MeOH (1.2 mL) was added TMSCHN<sub>2</sub> (2.00 M solution in Et<sub>2</sub>O; 0.35 mL, 0.70 mmol) at 0 °C. The mixture was stirred for 30 min at room temperature. Concentration under pressure gave an oily residue, which was purified by flash chromatography over silica gel with *n*-hexane–EtOAc (4:1) to give **19a** as a pale yellow amorphous solid (96.4 mg, 62% yield): IR (neat): 1736 (C=O), 1597 (C=C), 1347 (NSO<sub>2</sub>), 1177 (NSO<sub>2</sub>), <sup>1</sup>H NMR (500 MHz, CDCl<sub>3</sub>) δ 2.35 (s, 3H), 2.42 (s, 3H), 2.92 (ddd, *J* = 14.9, 12.0, 2.3 Hz, 1H), 3.03–3.08 (m, 1H), 3.19 (dd, *J* = 14.3, 10.9 Hz, 1H), 3.27 (dd, *J* = 14.9, 5.2 Hz, 1H), 3.70 (s, 3H), 4.26 (dd, *J* = 14.3, 5.2 Hz, 1H), 4.69–4.75 (m, 1H), 6.37 (s, 1H), 7.18–7.30 (m, 7H), 7.69 (d, *J* = 8.0 Hz, 2H), 7.76 (d, *J* = 8.0 Hz, 2H), 7.81 (d, *J* = 8.6 Hz, 1H); <sup>13</sup>C NMR (125 MHz, CDCl<sub>3</sub>) δ 21.5, 21.6, 29.4, 40.2, 40.8, 52.3, 53.0, 113.1, 115.9, 117.2, 120.4, 120.7, 125.8, 126.7 (4C), 128.3, 129.6, 129.9 (2C), 130.0 (2C), 133.4, 134.1, 135.4, 137.8, 143.7, 144.9, 171.2; HRMS (FAB) calcd for C<sub>30</sub>H<sub>29</sub>N<sub>2</sub>O<sub>6</sub>S<sub>2</sub>: [M + H]<sup>+</sup>, 577.1467; found: [M + H]<sup>+</sup>, 577.1471.

### Determination of Relative Configuration of **19a**:

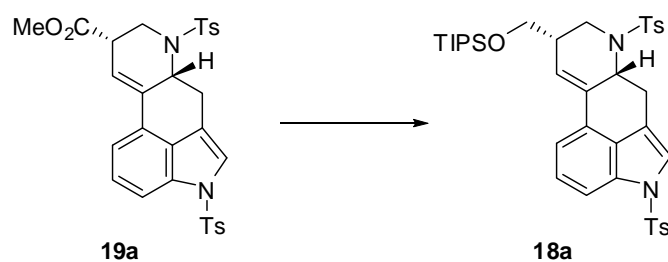

To a stirred solution of **19a** (5.0 mg, 0.0086 mmol) in MeOH (0.5 mL) was added NaBH<sub>4</sub> (1.63 mg, 0.043 mmol) at room temperature.<sup>6</sup> After stirring for 1 h at this temperature, H<sub>2</sub>O was added, and the mixture was concentrated under reduced pressure. The residue was dissolved in EtOAc and washed with brine and dried over MgSO<sub>4</sub>. The filtrate was concentrated under reduced pressure to give a crude alcohol, which was used without further purification. To a stirred solution of this alcohol in DMF (0.2 mL) were added imidazole (16.6 mg, 0.24 mmol) and TIPSCl (0.026 mL, 0.12 mmol) at 0 °C. After stirring overnight at room temperature, the mixture was diluted with Et<sub>2</sub>O and washed with H<sub>2</sub>O, brine and dried over MgSO<sub>4</sub>. The filtrate was concentrated under reduced pressure to give an oily residue, which was purified by PTLC with *n*-hexane–EtOAc (3:1) to give **18a** as a white amorphous solid (4.1 mg, 68% yield).

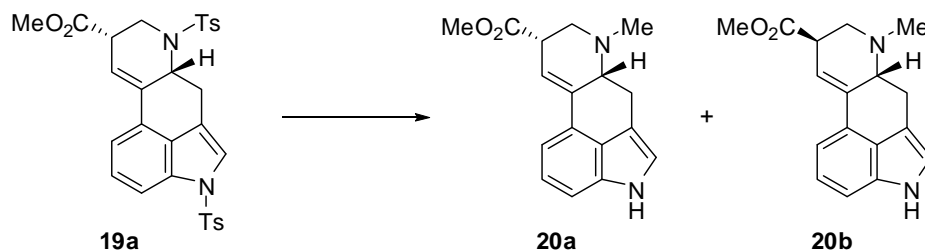

**(±)-Methyl Isolysergate (20a) and (±)-Methyl Lysergate (20b).** To a stirred solution of **19a** (30 mg, 0.052 mmol) in THF (1.6 mL) was added sodium naphthalenide (0.67 M solution in THF; 0.78 mL, 0.52 mmol)<sup>7</sup> at –78 °C under argon. The mixture was stirred for 10 min at this temperature and quenched with saturated NH<sub>4</sub>Cl. The mixture was made basic with saturated NaHCO<sub>3</sub>. The whole was extracted with EtOAc. The extract was washed with brine and dried over MgSO<sub>4</sub>. Concentration of the filtrate under reduced pressure gave a crude amine which was used without further purification. To a stirred solution of this amine in MeOH (3.0 mL) were added formalin (0.02 mL, 0.26 mmol), NaBH<sub>3</sub>CN (16.3 mg, 0.26 mmol) and AcOH (55 μL) at room temperature. After stirring for 1.5 h at this temperature, the mixture was quenched with saturated NaHCO<sub>3</sub>. The mixture was concentrated under pressure followed by filtration through a short pad of SiO<sub>2</sub> with EtOAc. The filtrate was concentrated under reduced pressure to give a yellow solid, which was purified by flash chromatography over silica gel with *n*-hexane–EtOAc (1:10) to give **20a** and **20b** as a yellow solid (9.0 mg, 61% yield, **a:b** = 35:65). <sup>1</sup>H NMR spectra of **20a** and **20b** were in agreement with those reported by Hendrickson<sup>8</sup>: <sup>1</sup>H NMR (400 MHz, CDCl<sub>3</sub>) of methyl

lysergate **20b** (major isomer):  $\delta$  2.63 (s, 3H), 2.68-2.73 (m, 2H), 3.20-3.27 (m, 1H), 3.30 (dd,  $J$  = 11.6, 4.9 Hz, 1H), 3.53 (dd,  $J$  = 14.5, 5.5 Hz, 1H), 3.73-3.76 (m, 1H), 3.79 (s, 3H), 6.60 (s, 1H), 6.92 (t,  $J$  = 1.8 Hz, 1H), 7.16-7.25 (m, 3H), 7.92 (br s, 1H); methyl isolysergate **20a** (minor isomer):  $\delta$  2.59 (s, 3H), 2.75-2.81 (m, 2H), 3.20-3.27 (m, 1H), 3.29-3.34 (m, 1H), 3.38 (dd,  $J$  = 11.6, 3.0 Hz, 1H), 3.44 (dd,  $J$  = 14.6, 5.4 Hz, 1H), 3.73 (s, 3H), 6.56 (d,  $J$  = 5.4 Hz, 1H), 6.91 (t,  $J$  = 1.8 Hz, 1H), 7.16-7.25 (m, 3H), 7.92 (br s, 1H); IR (neat): 3410 (NH), 1731 (C=O), 1604 (C=C); HRMS (FAB) calcd  $C_{17}H_{17}N_2O_2$ :  $[M - H]^-$ , 281.1296; found:  $[M - H]^-$ , 281.1304.

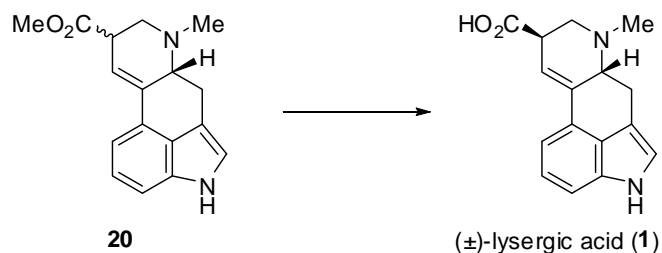

**(±)-Lysergic Acid (1).** The preparation of lysergic acid (**1**) was carried out according to the method of Hendrickson<sup>8</sup> and Szántay<sup>9</sup>: To solution of diastereomixture of methyl lysergate and isolysergate (20.6 mg, 0.073 mmol, **20a:b** = 35:65) in EtOH (0.68 mL) was added 1N NaOH (0.68 mL). The reaction mixture was stirred at 35 °C for 2 h. 0.1 N HCl solution was used to carefully adjust the pH to 6.2 and stirred for further 2 h at 0 °C while a solid material was formed. The precipitate was filtered off and washed with cold water and acetone to give **1** as a pale brown solid (10.6 mg, 54% yield). The IR, <sup>1</sup>H NMR and <sup>13</sup>C NMR spectra were in agreement with those reported by Hendrickson<sup>8</sup> and Szántay<sup>9</sup>: IR (neat): 3240 (OH), 1589 (C=O), <sup>1</sup>H NMR (500 MHz, C<sub>5</sub>D<sub>5</sub>N)  $\delta$  2.53 (s, 3H), 2.88-2.96 (m, 2H), 3.27-3.33 (m, 1H), 3.53 (dd,  $J$  = 11.2, 5.4 Hz, 1H), 3.64 (dd,  $J$  = 14.6, 5.4 Hz, 1H), 4.03-4.08 (m, 1H), 7.20-7.26 (m, 2H), 7.30 (dd,  $J$  = 8.0, 8.0 Hz, 1H), 7.43 (d,  $J$  = 8.0 Hz, 1H), 7.45 (d,  $J$  = 8.0 Hz, 1H), 11.68 (s, 1H); <sup>1</sup>H NMR (500 MHz, (CD<sub>3</sub>)<sub>2</sub>SO)  $\delta$  2.47 (s, 3H), 2.48-2.51 (m, 2H), 2.96-3.02 (m, 1H), 3.13 (dd,  $J$  = 11.5, 5.2 Hz, 1H), 3.46 (dd,  $J$  = 14.6, 5.4 Hz, 1H), 3.47-3.52 (m, 1H), 6.47 (br s, 1H), 7.01-7.08 (m, 3H), 7.18 (d,  $J$  = 7.4 Hz, 1H), 10.70 (br s, 1H); <sup>13</sup>C NMR (125 MHz, C<sub>5</sub>D<sub>5</sub>N)  $\delta$  27.8, 43.2, 43.9, 56.0, 63.7, 110.4, 110.5, 112.2, 119.8, 120.1, 127.3, 128.8, 135.8, 136.7, 175.0 (one of the sp<sup>2</sup> carbons was overlapped with C<sub>5</sub>D<sub>5</sub>N solvent peaks); <sup>13</sup>C NMR [125 MHz, (CD<sub>3</sub>)<sub>2</sub>SO]  $\delta$  26.6, 41.7, 43.2, 54.6, 62.5, 108.8, 109.9, 111.0, 118.7, 119.3, 122.3, 125.9, 127.3, 133.8, 135.4, 173.4; HRMS (FAB) calcd  $C_{16}H_{17}N_2O_2$ :  $[M - H]^-$ , 269.1290; found:  $[M - H]^-$ , 269.1289.

## Reference:

- (1) Lauchli, R.; Shea, K. J. *Org. Lett.* **2006**, 8, 5287-5289.
- (2) Sherry, B. D.; Toste, F. D. *J. Am. Chem. Soc.* **2004**, 126, 15978-15979.
- (3) Gockel, B.; Krause, N. *Org. Lett.* **2006**, 8, 4485-4488.
- (4) Agurell, S. *Acta Pharm. Suecica* **1966**, 3, 7-10.

- (5) Ninomiya, I.; Hashimoto, C.; Kiguchi, T.; Naito, T.; Barton, D. H. R.; Lusinchi, X.; Milliet, P. *J. Chem. Soc., Perkin Trans. 1* **1990**, 707-713.
- (6) Ballabio, M.; Sbraletta, P.; Mantegani, S.; Brambilla, E. *Tetrahedron* **1992**, 48, 4555-4566.
- (7) Hong, S.; Yang, J.; Weinreb, S. M. *J. Org. Chem.* **2006**, 71, 2078-2089.
- (8) Hendrickson, J. B.; Wang, J. *Org. Lett.* **2004**, 6, 3-5.
- (9) Moldvai, I.; Temesvári-Major, E.; Incze, M.; Szentirmay, É.; Gács-Baitz, E.; Szántay, C. *J. Org. Chem.* **2004**, 69, 5993-6000.

single\_pulse

DFILE 1016C-40-2-1.als  
 COMNT single\_pulse  
 DATIM 20-06-2007 17:36:01  
 OBNUC 1H  
 EXMOD single\_pulse.ex2  
 OBFRQ 500.16 MHz  
 OBSET 2.41 KHz  
 OBFIN 6.01 Hz  
 POINT 52428  
 FREQU 7507.39 Hz  
 SCANS 8  
 ACQTM 6.9835 sec  
 PD 5.0000 sec  
 PW1 6.25 usec  
 IRNUC 1H  
 CTEMP 25.0 c  
 SLVNT CDCl3  
 EXREF 0.00 ppm  
 BF 1.20 Hz  
 RGAIN 44

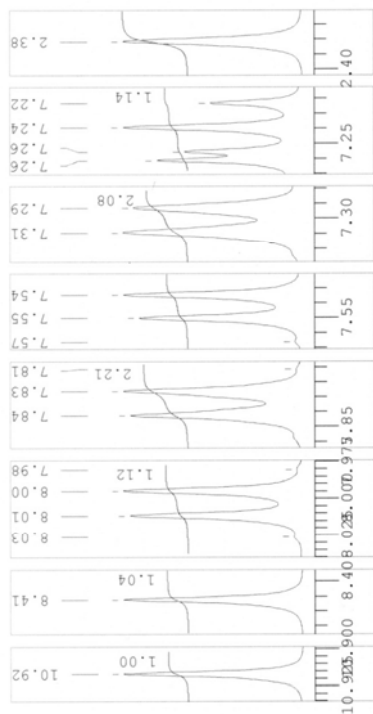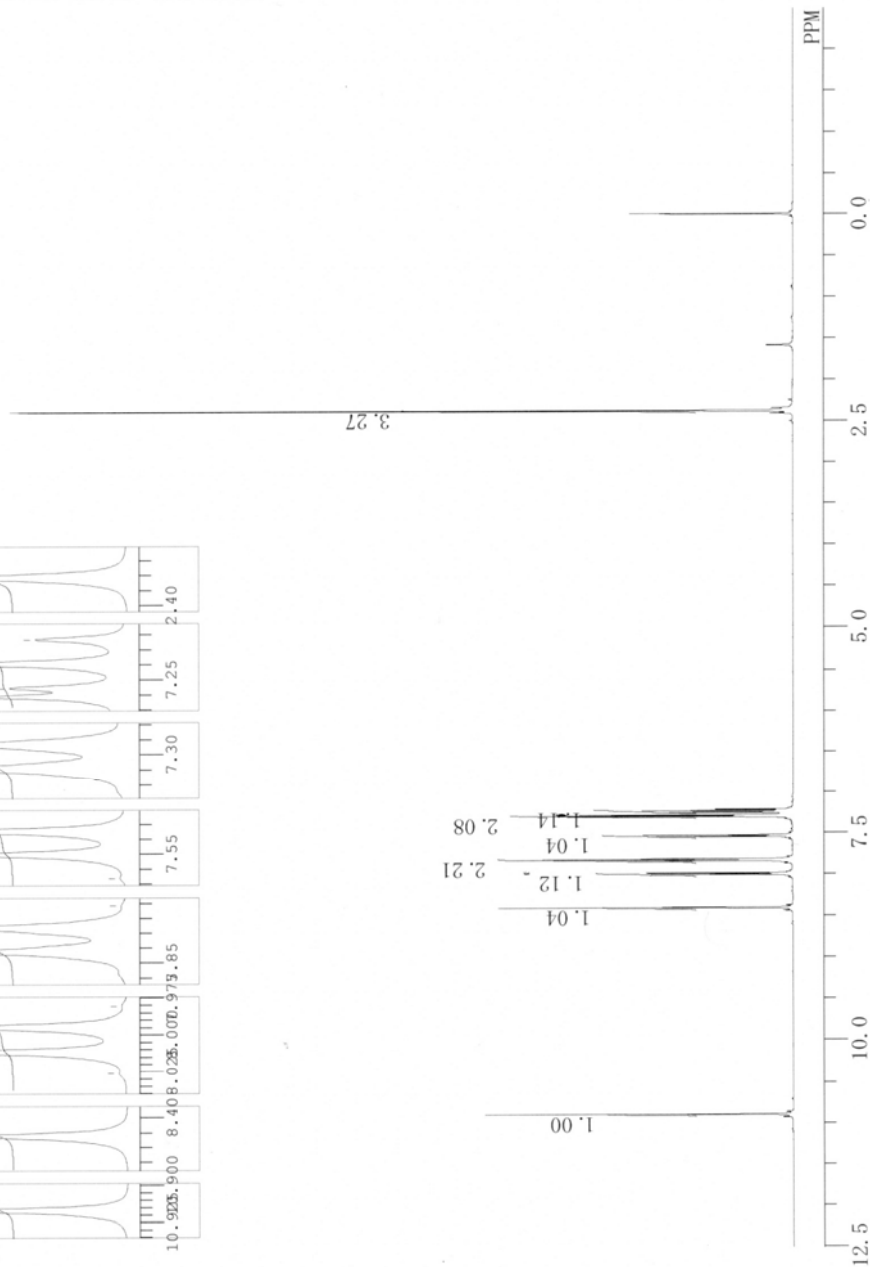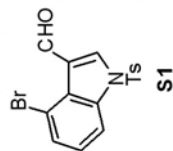



1016C-40-2BCM

DFILE 1016C-40-2BCM1BCM\_E16\_FT.a  
 COMNT 1016C-40-2BCM  
 DATIM Wed Jun 20 16:33:50 2007  
 OBNUC 13C  
 EXMOD BCM  
 OBFRQ 100.40 MHz  
 OBSET 125.00 KHz  
 OBFIN 10500.00 Hz  
 POINT 32768  
 FREQU 27118.64 Hz  
 SCANS 512  
 ACQTM 1.2083 sec  
 PD 1.7920 sec  
 PW1 5.10 usec  
 IRNUC 1H  
 CTEMP 23.7 c  
 SLVNT CDCl3  
 EXREF 77.00 ppm  
 BF 1.20 Hz  
 RGAIN 25

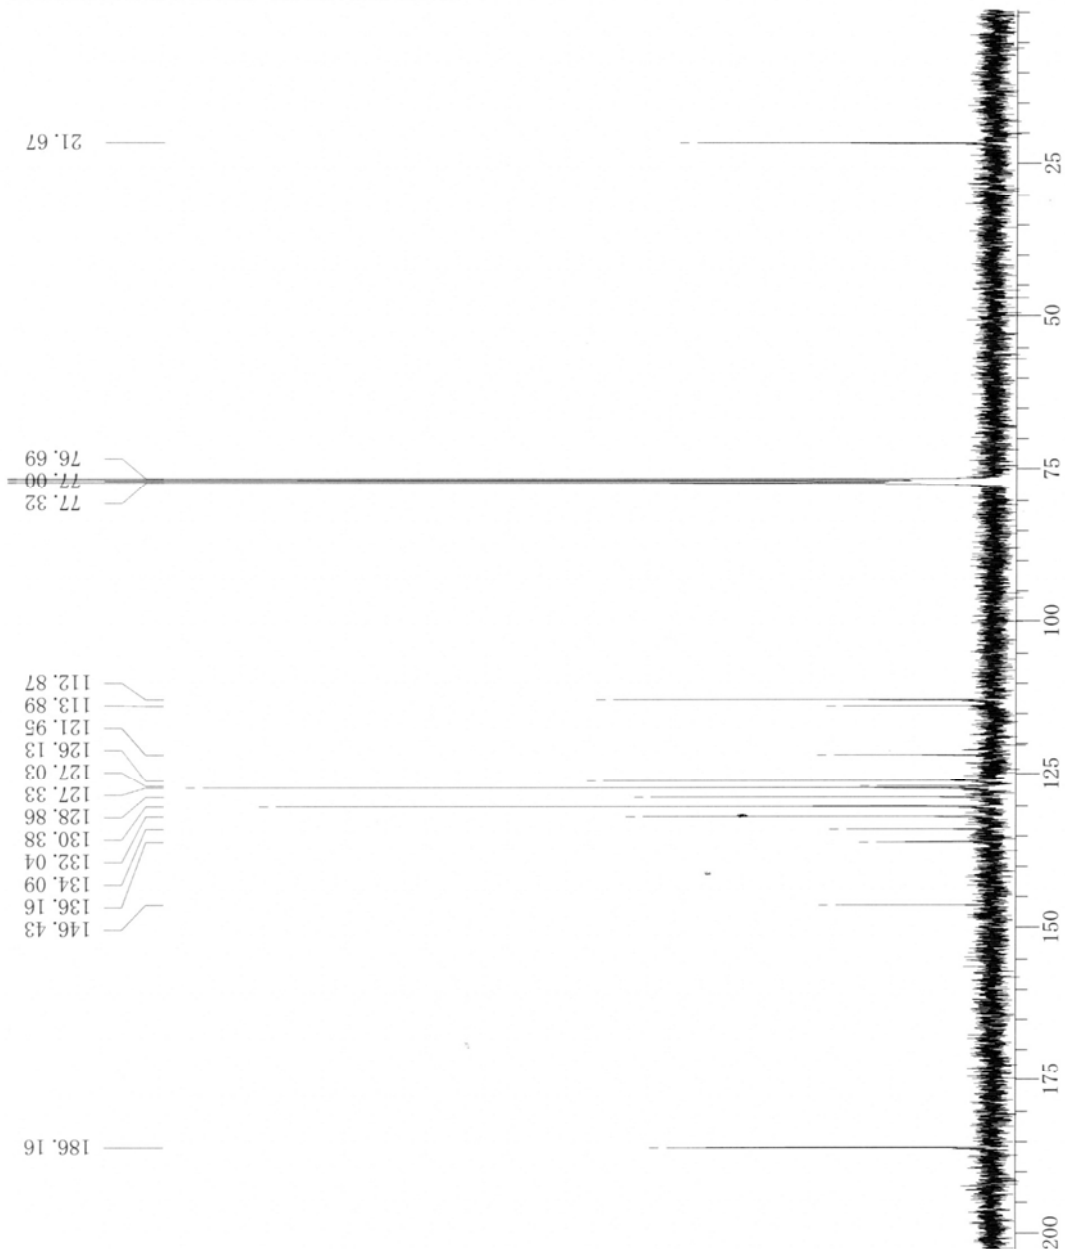

single\_pulse

DFILE 1016C-43-1-1.als  
 COMNT single\_pulse  
 DATIM 22-06-2007 10:13:12  
 OBNUC 1H  
 EXMOD single\_pulse.ex2  
 OBFREQ 500.16 MHz  
 OBSET 2.41 KHz  
 OBFIN 6.01 Hz  
 POINT 52428  
 FREQU 7507.39 Hz  
 SCANS 8  
 ACQTM 6.9835 sec  
 PD 5.0000 sec  
 PW1 6.25 usec  
 IRNUC 1H  
 CTEMP 25.2 c  
 SLVNT CDCL3  
 EXREF 0.00 ppm  
 BF 1.20 Hz  
 RGAIN 46

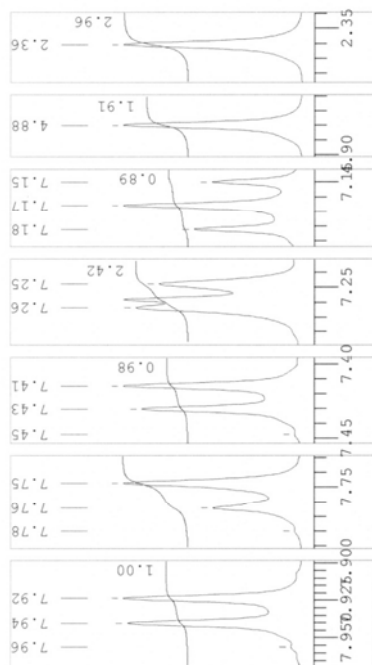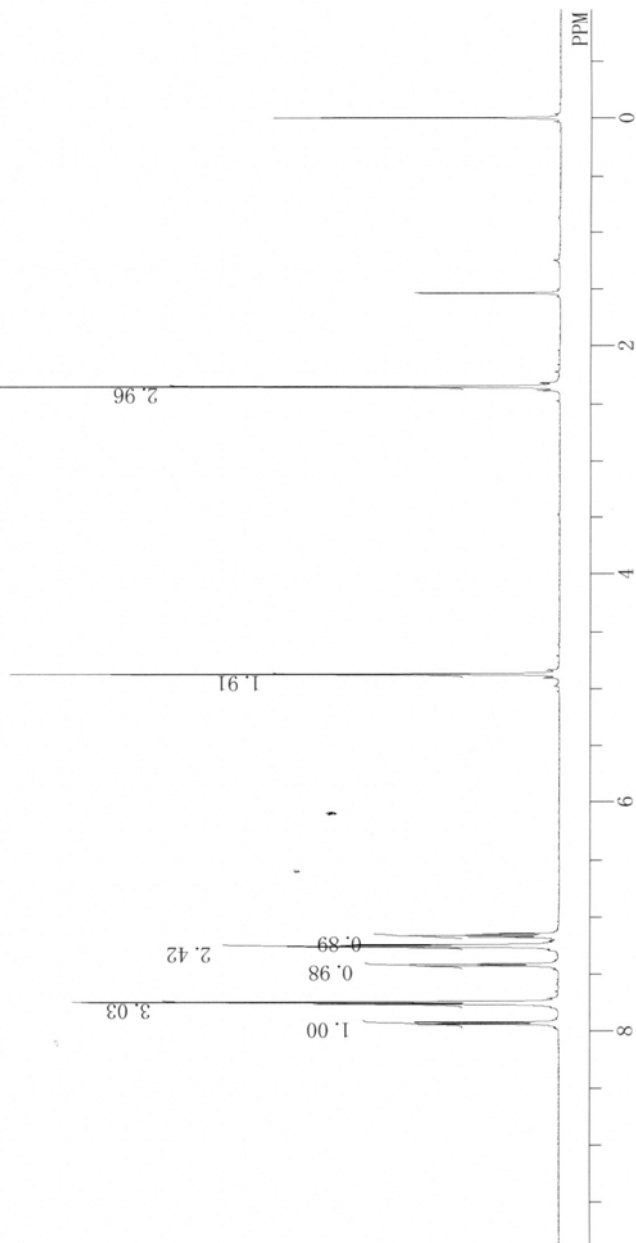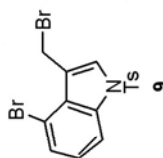

1016C-43BCM

DFILE 1016C-43BCM1BCM\_E1\_FT.als  
 COMNT 1016C-43BCM  
 DATIM Fri Jun 22 11:10:12 2007  
 OBNUC <sup>13</sup>C  
 EXMOD BCM  
 OBFREQ 100.40 MHz  
 OBSFET 125.00 KHz  
 OBFIN 10500.00 Hz  
 POINT 32768  
 FREQU 27118.64 Hz  
 SCANS 1024  
 ACQTM 1.2083 sec  
 PD 1.7920 sec  
 PW1 5.10 usec  
 IRNUC <sup>1</sup>H  
 CTEMP 23.7 c  
 SLVNT CDCl<sub>3</sub>  
 EXREF 77.00 ppm  
 BF 1.20 Hz  
 RGAIN 25

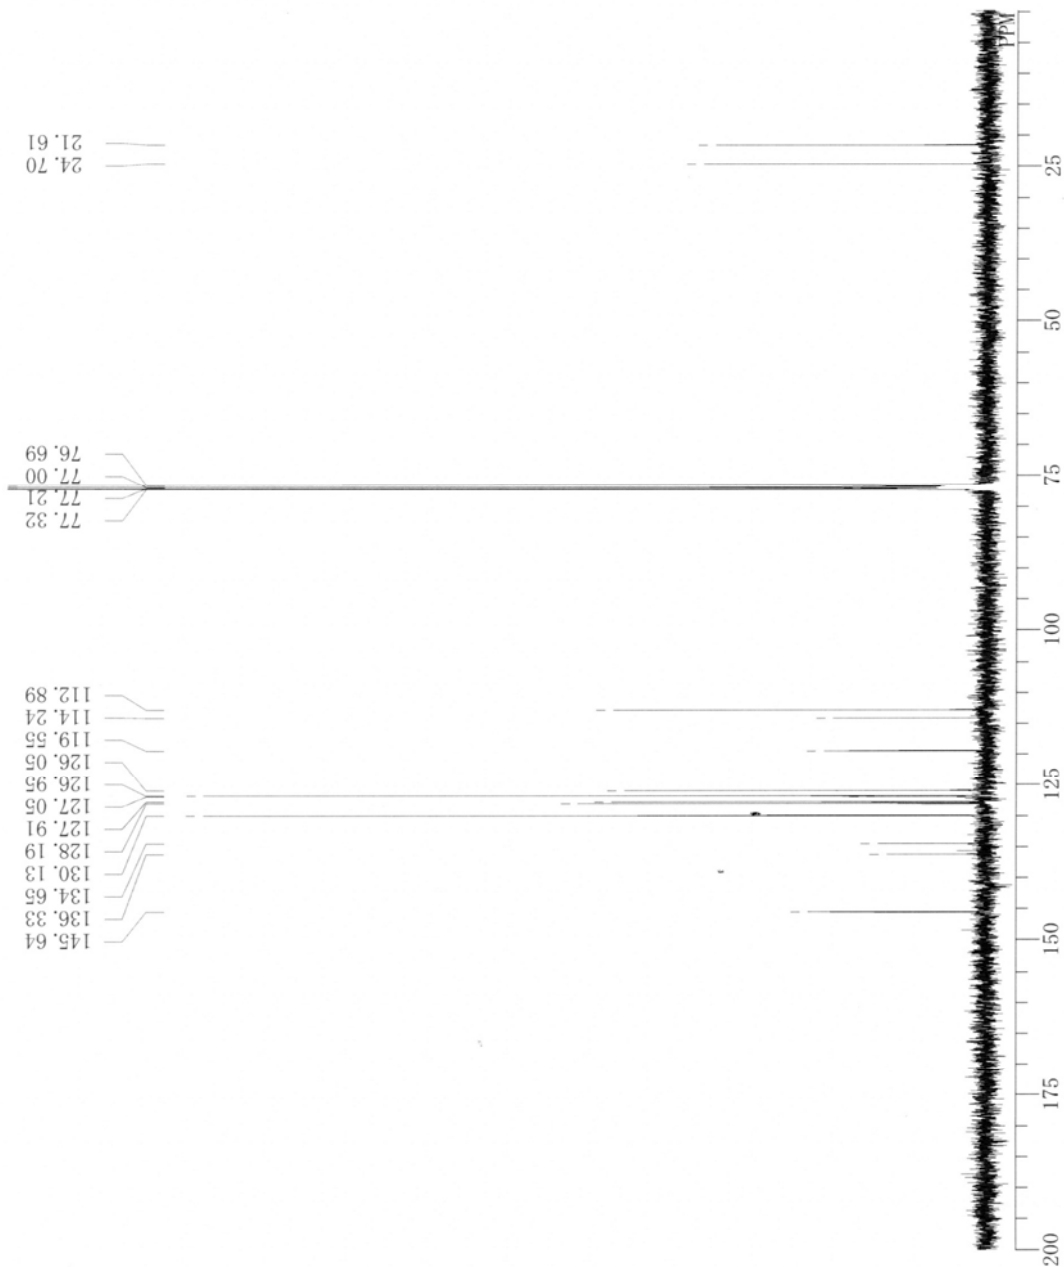

single\_pulse

DFILE 1016C127 070915-2-2.als  
 COMNT single\_pulse  
 DATIM 15-09-2007 14:50:37  
 OBNUC 1H  
 EXMOD single\_pulse.ex2  
 OBFRQ 500.16 MHz  
 OBSET 2.41 KHz  
 OBFIN 6.01 Hz  
 POINT 52428  
 FREQU 7507.39 Hz  
 SCANS 8  
 ACQTM 6.9835 sec  
 PD 5.0000 sec  
 PW1 6.05 usec  
 IRNUC 1H  
 CTEMP 25.3 c  
 SLVNT CDCl3  
 EXREF 0.00 ppm  
 BF 1.20 Hz  
 RGAIN 44

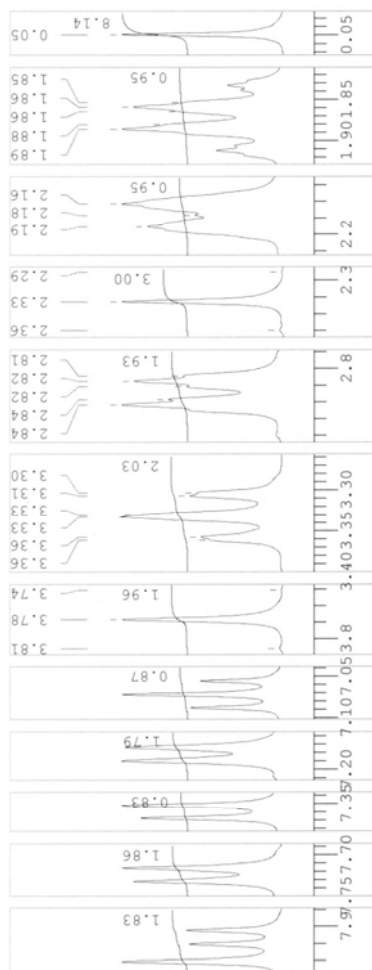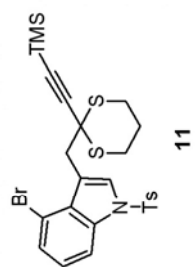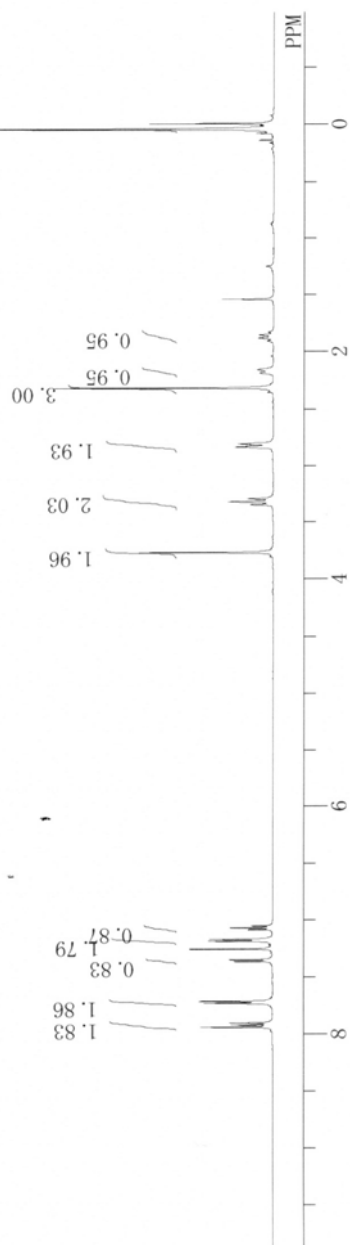

single pulse decoupled gated NOE

DFILE 1016C127BCM-1.als  
 COMNT single pulse decoupled gate  
 DATIM 15-09-2007 15:40:15  
 OBNLC 13C  
 EXMOD single\_pulse\_dec  
 OBFRQ 125.77 MHz  
 OBSET 7.87 KHz  
 OBFIN 4.21 Hz  
 POINT 26214  
 FREQU 31446.06 Hz  
 SCANS 1024  
 ACQTM 0.8336 sec  
 PD 2.0000 sec  
 PW1 3.83 usec  
 IRNLC 1H  
 CTEMP 25.5 c  
 SLVNT CDCL3  
 EXREF 0.00 ppm  
 BF 1.20 Hz  
 RGAIN 58

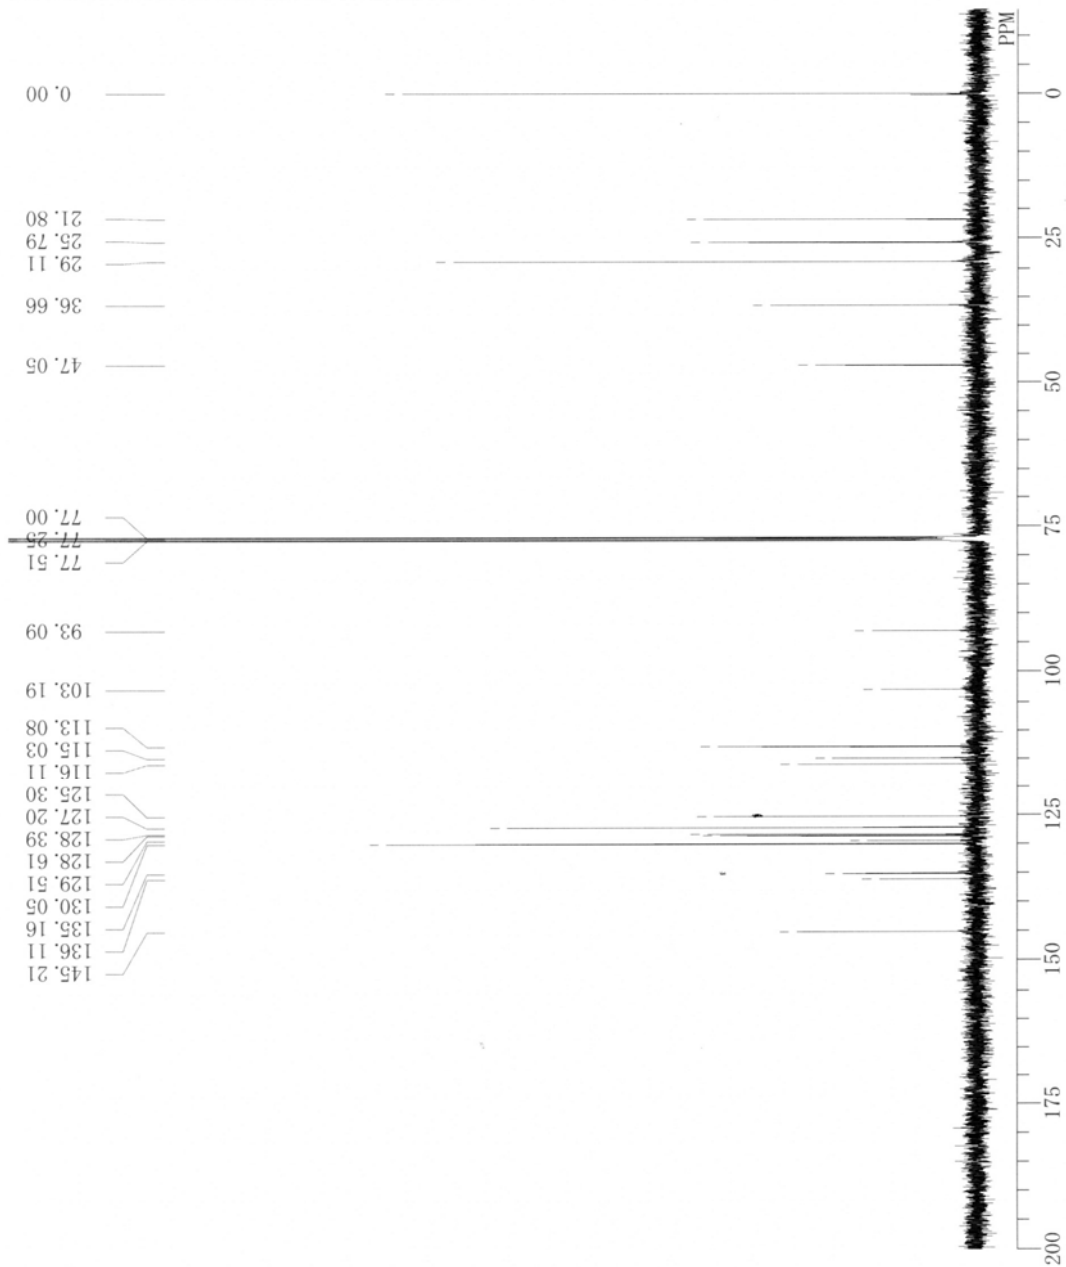

single\_pulse

DFILE 1016D4-1.als  
 COMNT single\_pulse  
 DATIM 24-11-2007 11:39:40  
 OBNUC 1H  
 EXMOD single\_pulse.ex2  
 OBFREQ 500.16 MHz  
 OBSET 2.41 KHz  
 OBFIN 6.01 Hz  
 POINT 13107  
 FREQU 7507.39 Hz  
 SCANS 8  
 ACQTM 1.7459 sec  
 PD 5.0000 sec  
 PW1 6.05 usec  
 IRNUC 1H  
 CTMP 27.9 c  
 SLVNT CDCL3  
 EXREF 0.00 ppm  
 BF 0.12 Hz  
 RGAIN 50

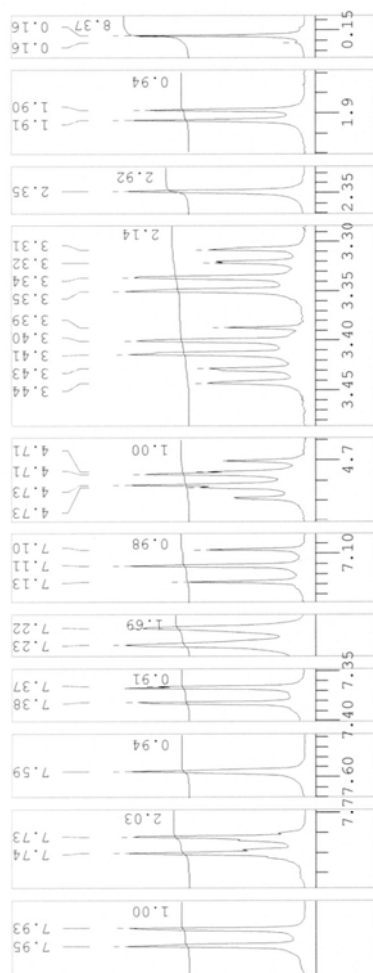

8.37

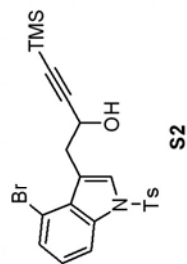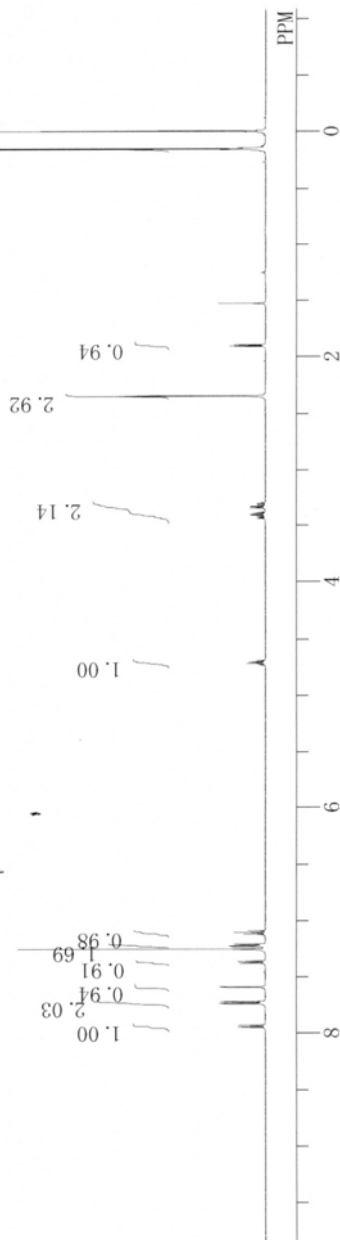

single pulse decoupled gated NOE

DFILE 1016C198BCM-date-1.als  
 COMNT single pulse decoupled gate  
 DATIM 21-11-2007 01:12:48  
 OBNUC 13C  
 EXMOD single\_pulse\_dec  
 OBFREQ 125.77 MHz  
 OBSET 7.87 KHz  
 OBFIN 4.21 Hz  
 POINT 26214  
 FREQU 31446.06 Hz  
 SCANS 1024  
 ACQTM 0.8336 sec  
 PD 2.0000 sec  
 PW1 3.83 usec  
 IRNUC 1H  
 CTEMP 28.4 c  
 SLVNT CDCL3  
 EXREF 0.00 ppm  
 BF 0.12 Hz  
 RGAIN 60

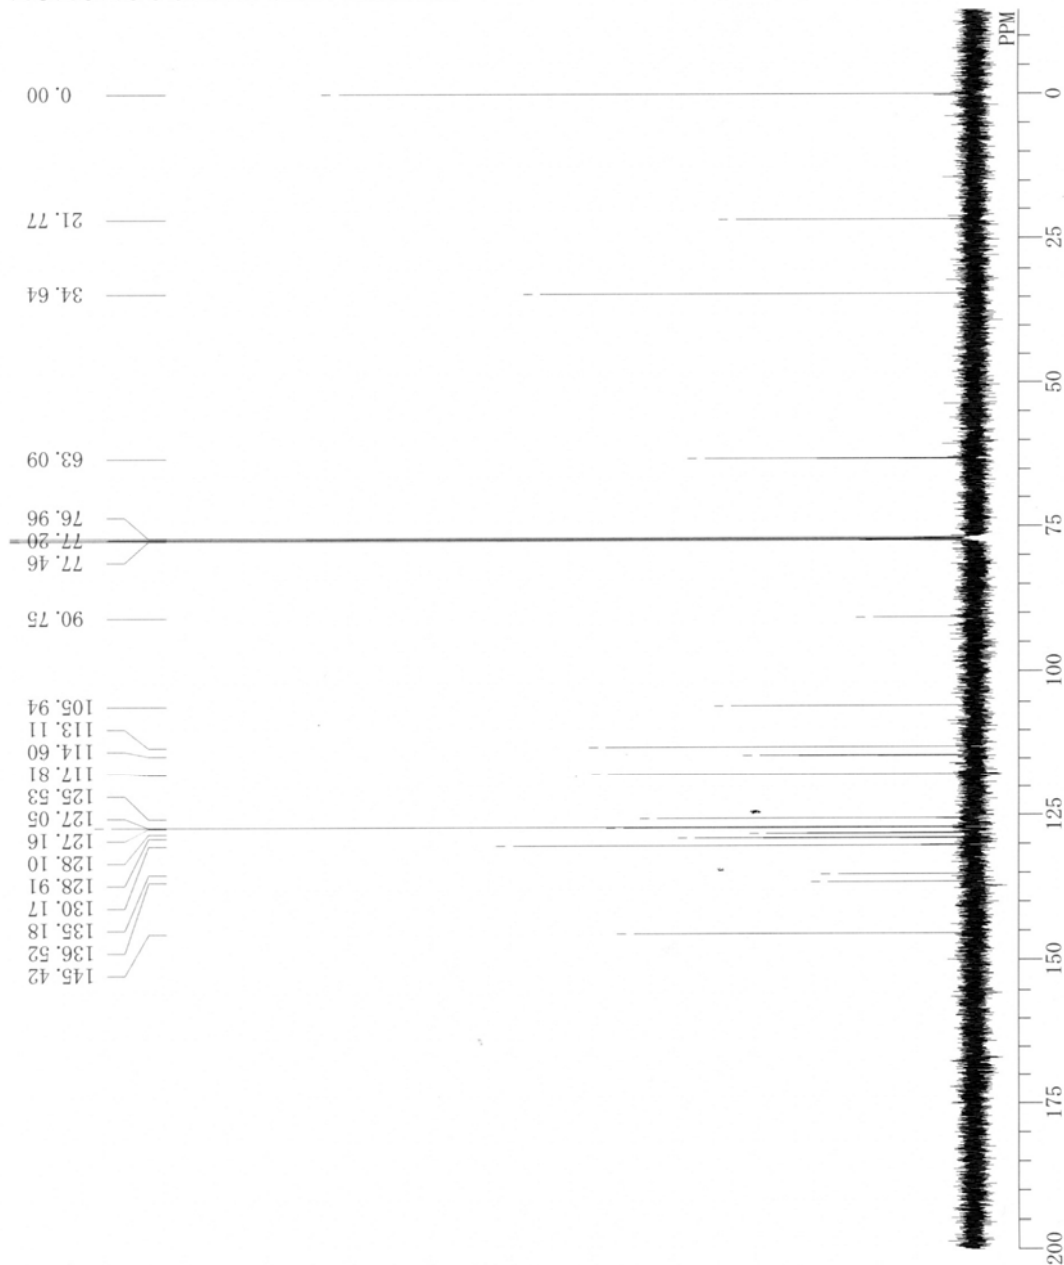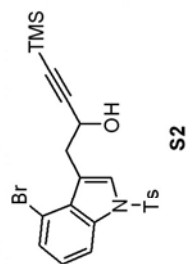

DFILE 1016D93a.als  
 COMET Wed Feb 20 22:24:20 2008  
 DATIM 1H  
 OBNUC NON  
 EXMOD  
 OBFREQ 399.65 MHz  
 OBSFREQ 124.00 KHz  
 OBFIN 10500.00 Hz  
 POINT 32768  
 FREQU 7992.01 Hz  
 SCANS 8  
 ACQTM 4.1001 sec  
 PD 2.9000 sec  
 5.50 usec  
 1H 27.1 c  
 CDCL3  
 CTEMP 0.00 ppm  
 SLVNT 0.12 Hz  
 EXREF 23  
 BF  
 RGAIN

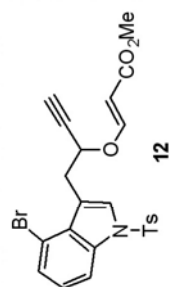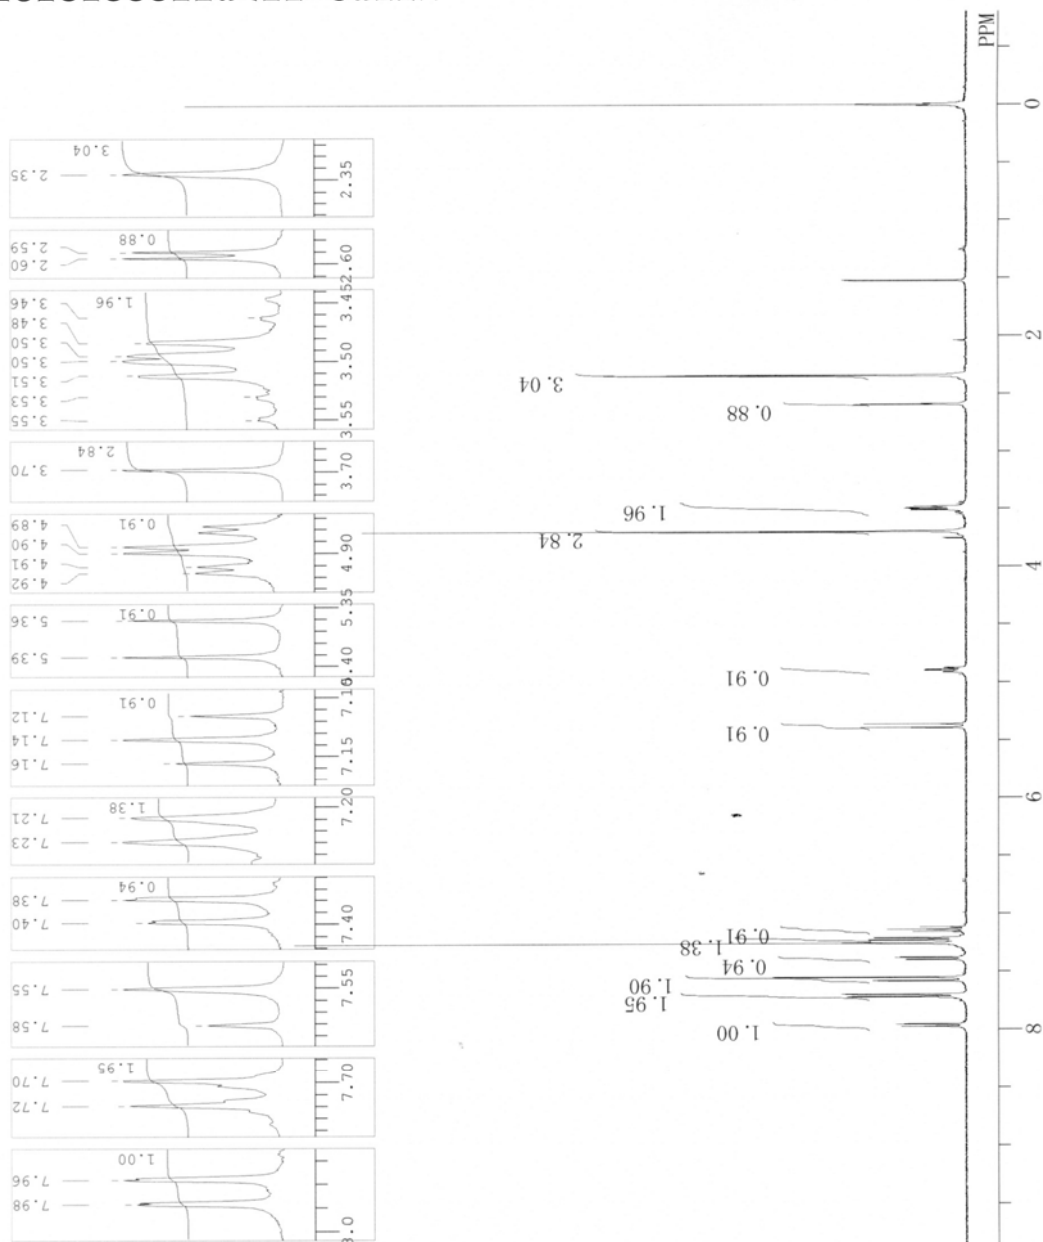



single pulse decoupled gated NOE

DFILE 1016D93BCM-1.als  
 COMNT single pulse decoupled gate  
 DATIM 20-02-2008 23:12:49  
 ORNUC <sup>13</sup>C  
 EXMOD single\_pulse\_dec  
 OBFREQ 125.77 MHz  
 OBSET 7.87 KHz  
 OBFIN 4.21 Hz  
 POINT 26214  
 FREQU 31446.06 Hz  
 SCANS 512  
 ACQTM 0.8336 sec  
 PD 2.0000 sec  
 PW1 3.83 usec  
 IRNUC <sup>1</sup>H  
 CTEMP 27.6 c  
 SLVNT CDCL3  
 EXREF 77.00 ppm  
 BF 0.12 Hz  
 RGAIN 60

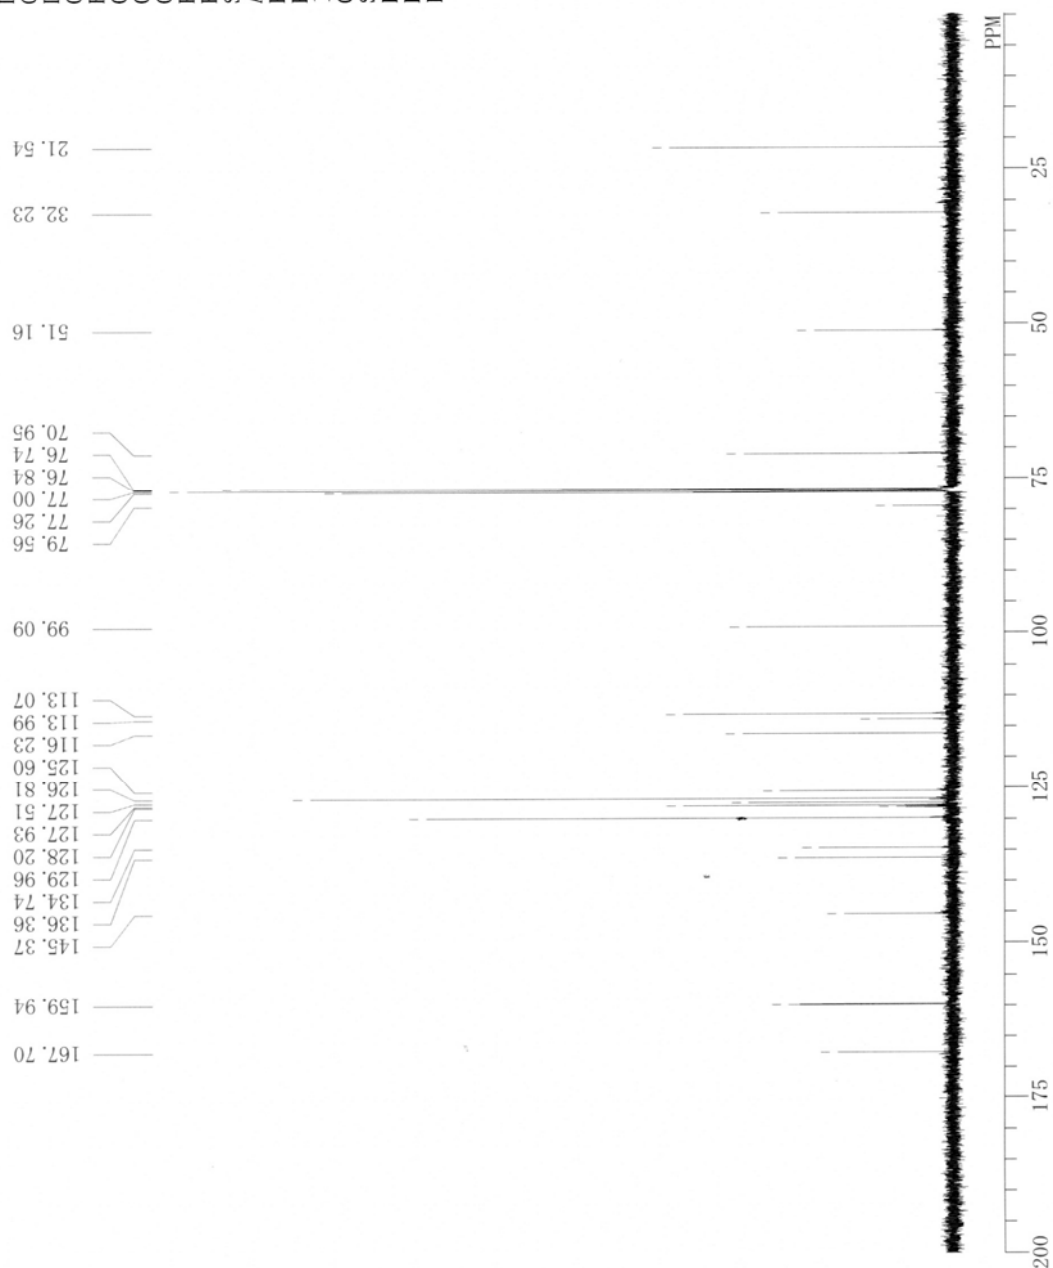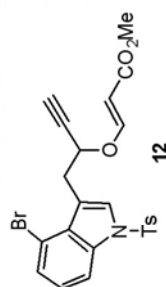

single\_pulse

DFILE 1016D105c-1.als  
 COMNT single\_pulse  
 DATIM 26-02-2008 19:08:22  
 OBNUC 1H  
 EXMOD single\_pulse.ex2  
 OBFRQ 500.16 MHz  
 OBSET 2.41 KHz  
 OBFIN 6.01 Hz  
 POINT 13107  
 FREQU 7507.39 Hz  
 SCANS 8  
 ACQTM 1.7459 sec  
 PD 5.0000 sec  
 PW1 6.05 usec  
 IRNUC 1H  
 CTEMP 27.3 c  
 SLVNT CDCL3  
 EXREF 0.00 ppm  
 BF 0.12 Hz  
 RGAIN 40

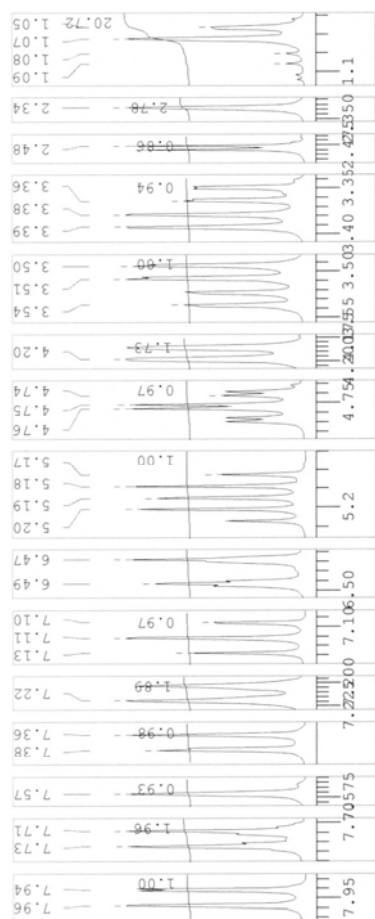

20.72

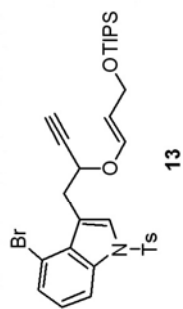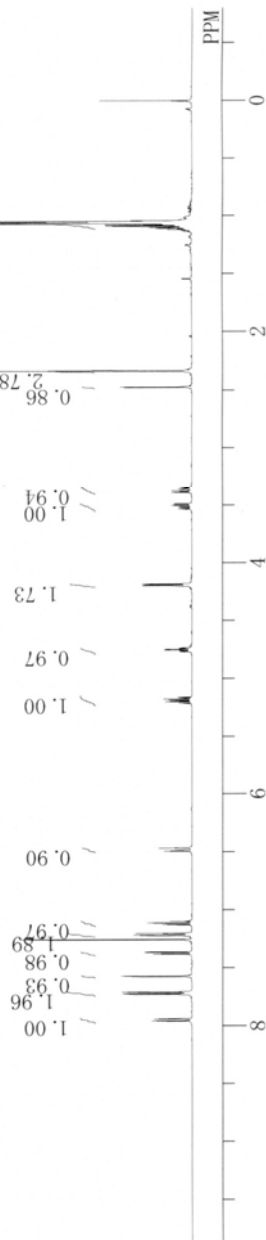

single pulse decoupled gated NOE

1016D105 BCM-1.als  
 single pulse decoupled gate  
 26-02-2008 19:41:12  
 13C  
 EXMOD single\_pulse\_dec  
 OBFREQ 125.77 MHz  
 OBSFREQ 7.87 KHz  
 OBSFREQ 4.21 Hz  
 POINT 26214  
 FREQU 31446.06 Hz  
 SCANS 500  
 ACQTM 0.8336 sec  
 PD 2.0000 sec  
 PW1 3.83 usec  
 1H  
 IRNUC 1H  
 CTMP 27.7 c  
 SLVNT CDCL3  
 EXREF 77.00 ppm  
 BF 0.12 Hz  
 RGAIN 60

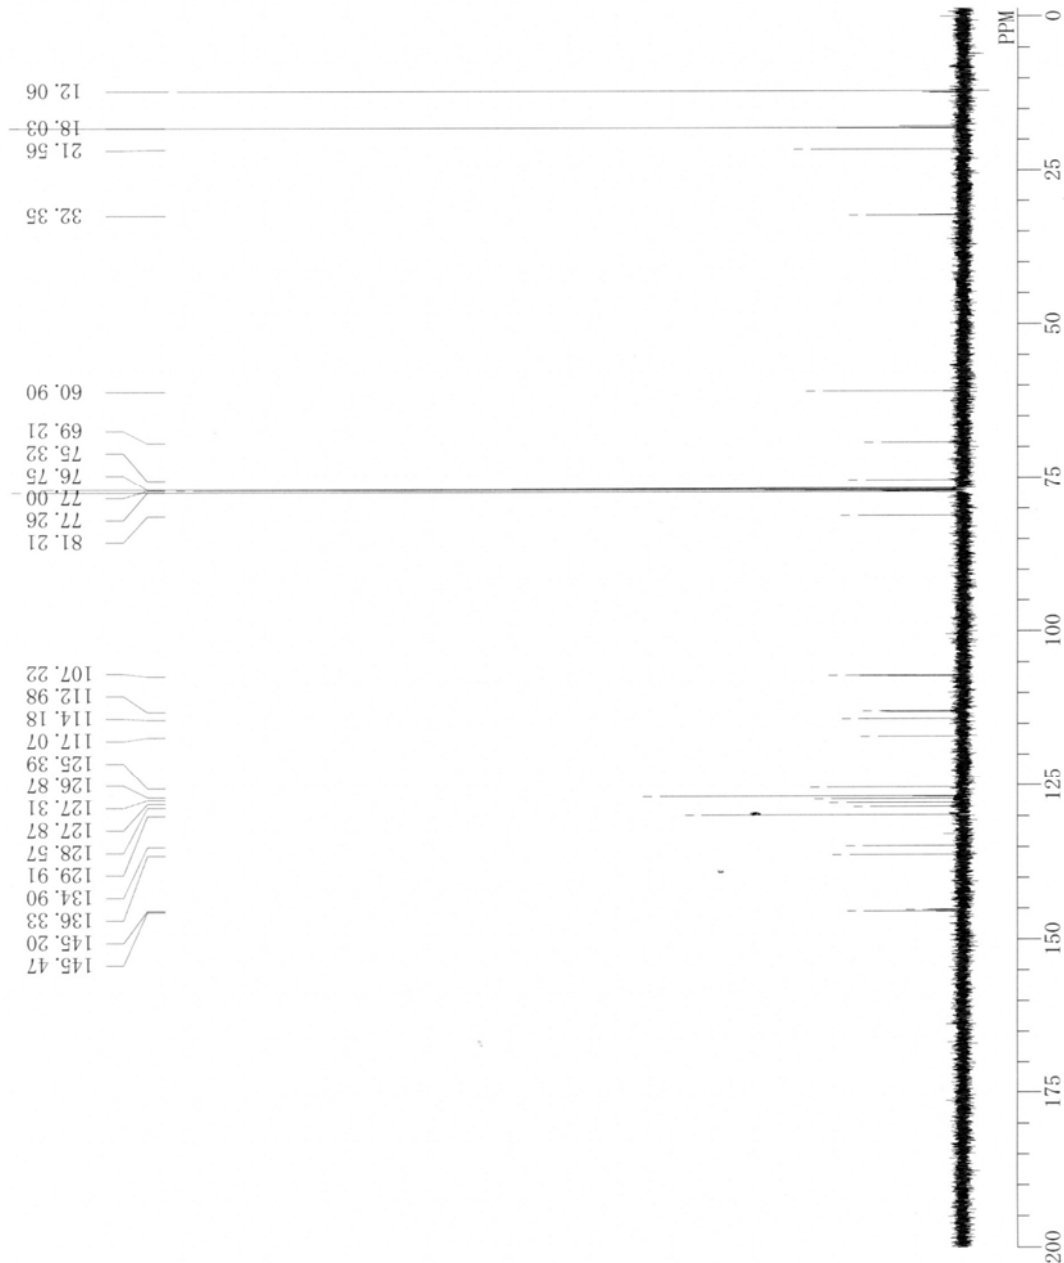

single\_pulse

DFILE 1016D10-major-b-1.als  
 COMNT single\_pulse  
 DATIM 09-12-2007 21:05:27  
 OBNUC 1H  
 EXMOD single\_pulse.ex2  
 OBRFQ 500.16 MHz  
 OBSET 2.41 KHz  
 OBFIN 6.01 Hz  
 POINT 13107  
 FREQU 7507.39 Hz  
 SCANS 8  
 ACQTM 1.7459 sec  
 PD 5.0000 sec  
 PW1 6.05 usec  
 IIRNUC 1H  
 CTMP 25.8 c  
 SLVNT CDCl3  
 EXREF 0.00 ppm  
 BF 0.12 Hz  
 RGAIN 36

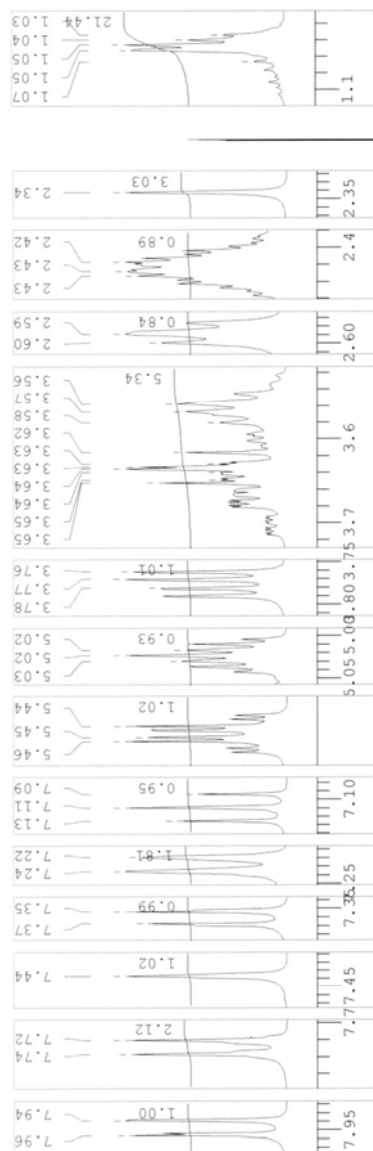

21.44

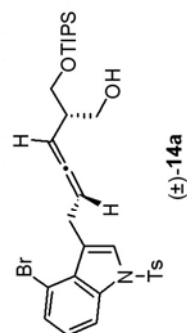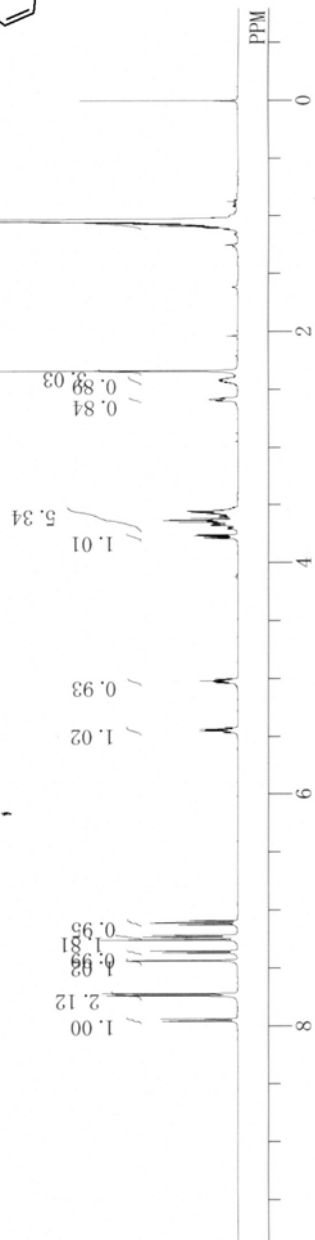

single pulse decoupled gated NOE

DFILE 1016D10major-BCM-1.als  
 COMNT single pulse decoupled gate  
 DATIM 09-12-2007 21:31:34  
 OBNUC <sup>13</sup>C  
 EXMOD single\_pulse\_dec  
 OBFRQ 125.77 MHz  
 OBSET 7.87 KHz  
 OBFIN 4.21 Hz  
 POINT 26214  
 FREQU 31446.06 Hz  
 SCANS 512  
 ACQTM 0.8336 sec  
 PD 2.0000 sec  
 PW1 3.83 usec  
 IRNUC <sup>1</sup>H  
 CTEMP 26.1 c  
 SLVNT CDCL3  
 EXREF 77.00 ppm  
 BF 0.12 Hz  
 RGAIN 58

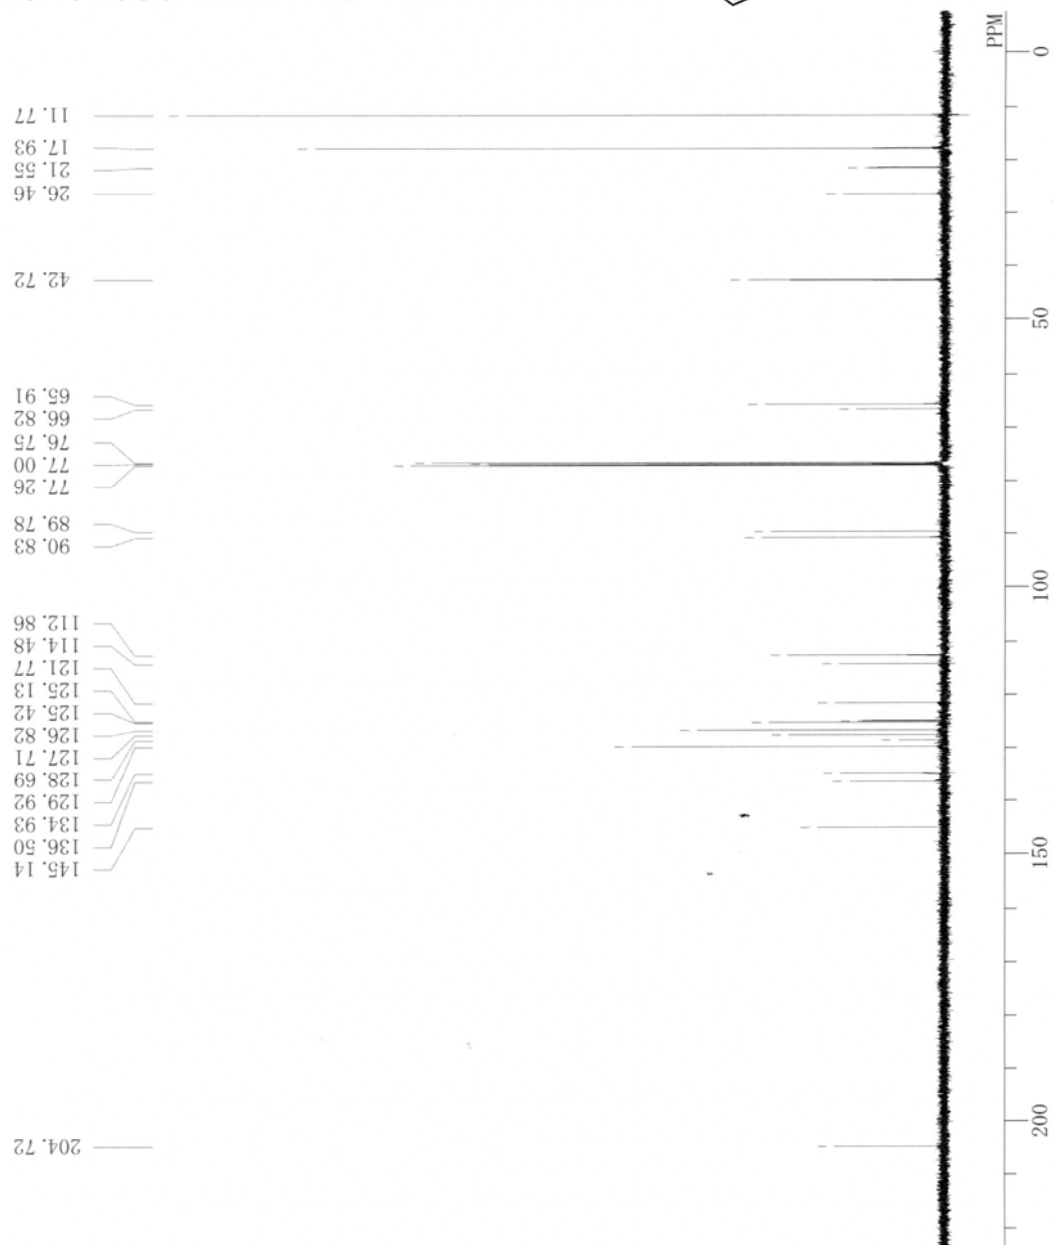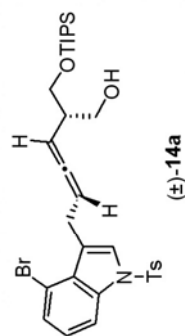

single\_pulse

DFILE 1016D10-miner-1.als  
 COMNT single\_pulse  
 DATIM 09-12-2007 20:54:03  
 OBNUC 1H  
 EXMOD single\_pulse.ex2  
 OBFRQ 500.16 MHz  
 OBSET 2.41 KHz  
 OBFIN 6.01 Hz  
 POINT 13107  
 FREQU 7507.39 Hz  
 SCANS 8  
 ACQTM 1.7459 sec  
 PD 5.0000 sec  
 PW1 6.05 usec  
 IRNUC 1H  
 CTEMP 25.8 c  
 SLVNT CDCl3  
 EXREF 0.00 ppm  
 BF 0.12 Hz  
 RGAIN 38

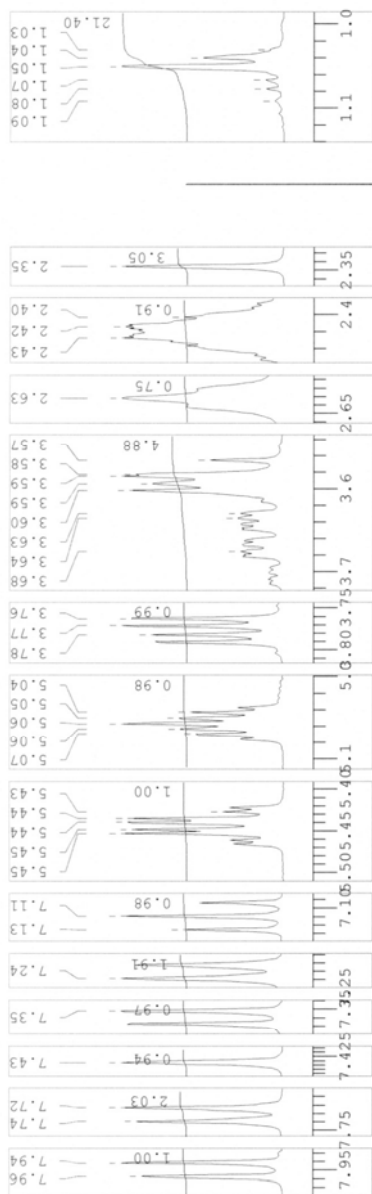

21.40

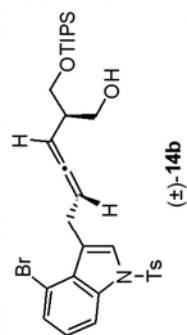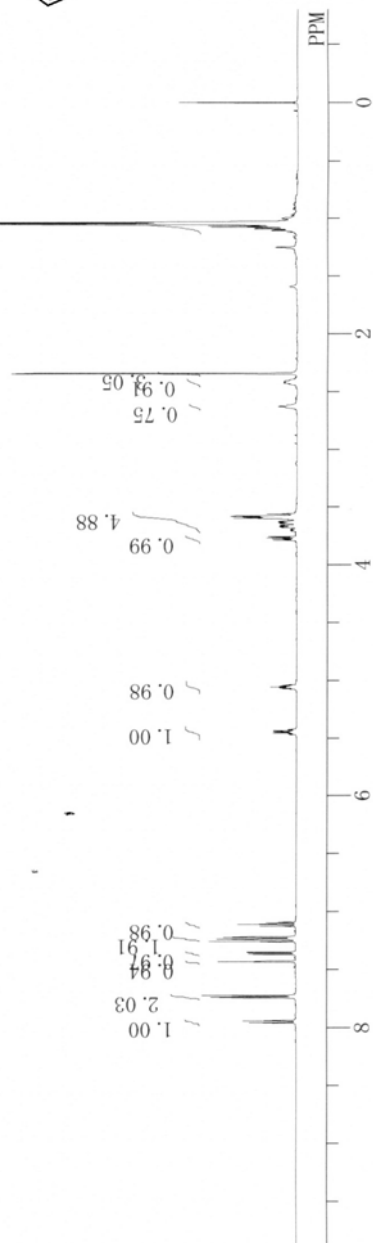

single pulse decoupled gated NOE

DFILE 1016D10miner-RCM-1.als  
 COMNT single pulse decoupled gate  
 DATIM 09-12-2007 22:00:29  
 OBNUC <sup>13</sup>C  
 EXMOD single pulse dec  
 OBFREQ 125.77 MHz  
 OBSET 7.87 kHz  
 OBFIN 4.21 Hz  
 POINT 26214  
 FREQU 31446.06 Hz  
 SCANS 512  
 ACQTM 0.8336 sec  
 PD 2.0000 sec  
 PW1 3.83 usec  
 IRNUC <sup>1</sup>H  
 CTEMP 26.1 c  
 SLVNT CDCL<sub>3</sub>  
 EXREF 77.00 ppm  
 BF 0.12 Hz  
 RGAIN 58

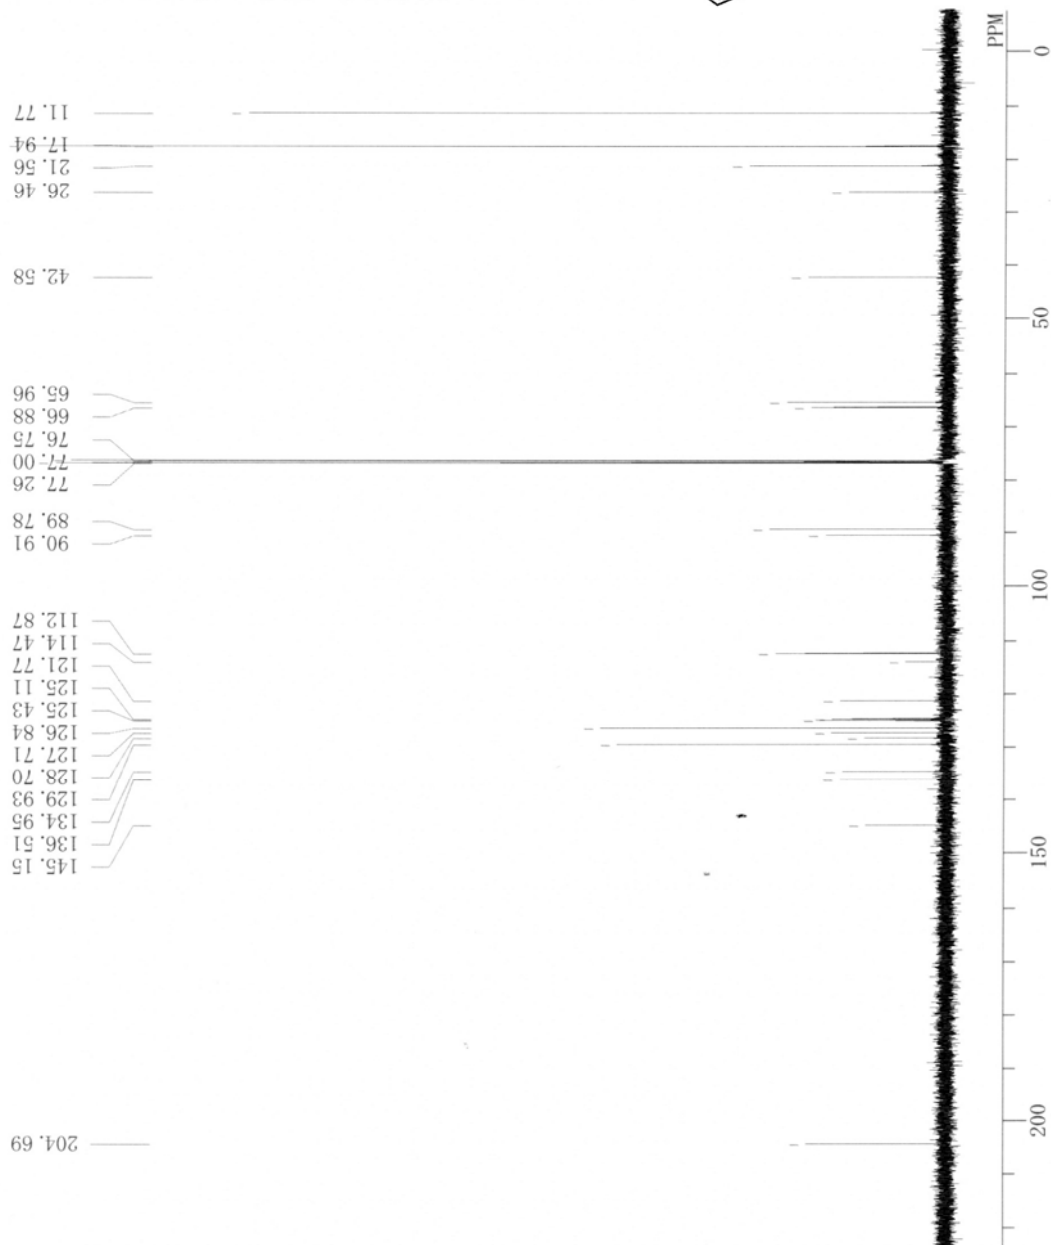

single\_pulse

DFILE 1016D68 benzene-d-1.als  
 COMNT single\_pulse  
 DATIM 19-01-2008 17:58:41  
 OBNUC 1H  
 EXMOD single\_pulse,ex2  
 OBFREQ 500.16 MHz  
 OBSET 2.41 KHz  
 OBFIN 6.01 Hz  
 POINT 13107  
 FREQU 7507.39 Hz  
 SCANS 8  
 ACQTM 1.7459 sec  
 PD 5.0000 sec  
 PW1 6.05 usec  
 IIRUC 1H  
 CTEMP 25.7 c  
 SLVNT C6D6  
 EXREF 0.00 ppm  
 BF 0.10 Hz  
 RGAIN 40

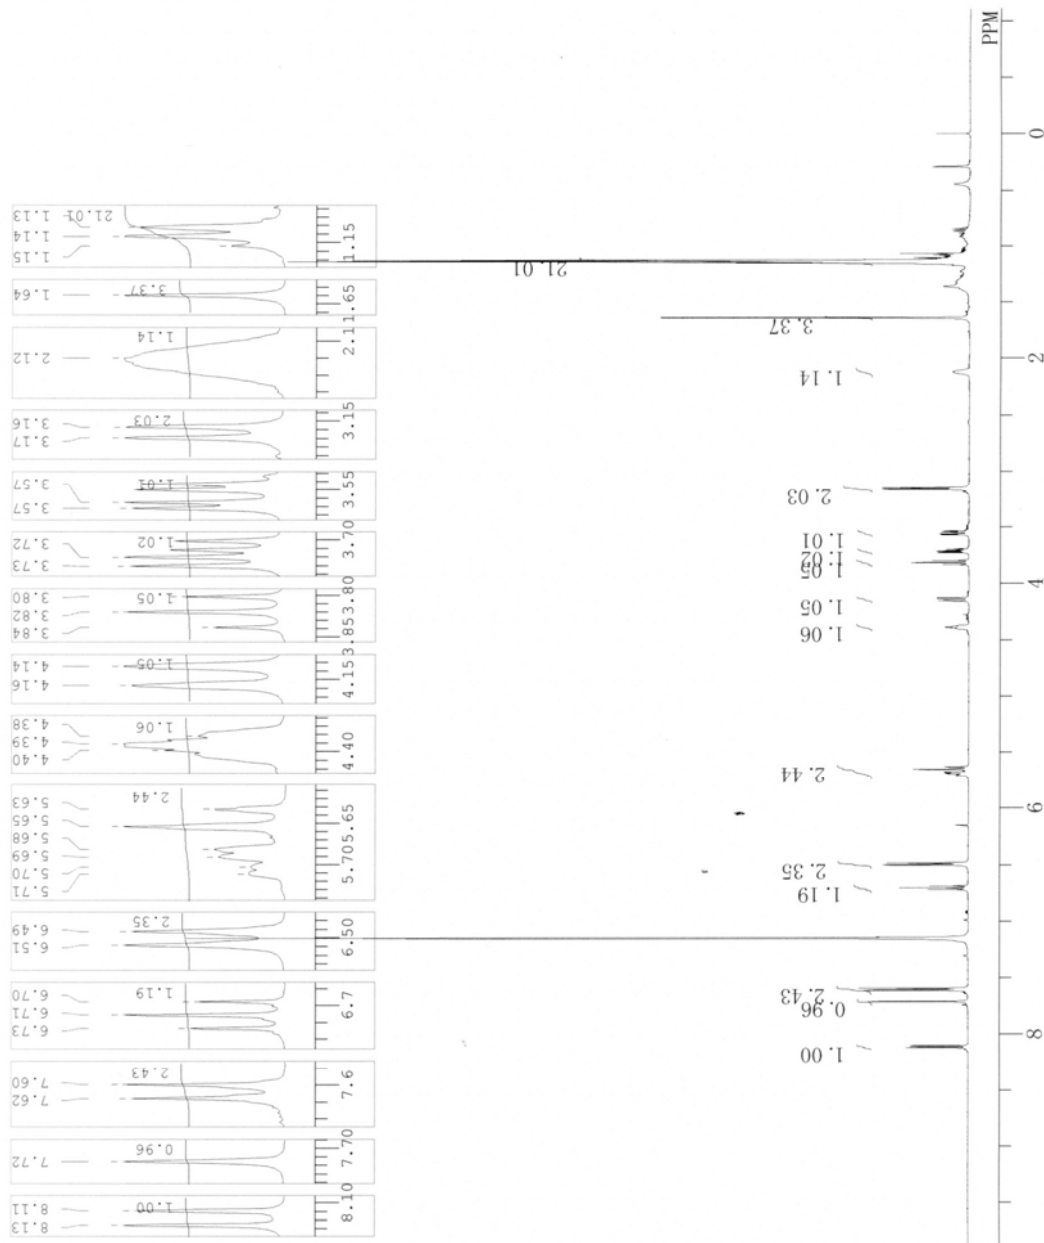



DFILE 1016D28-1BCM1BCM\_E5\_FT.a1s  
COMNT 1016D28-1BCM  
DATIM Thu Dec 20 03:28:29 2007  
ORNUC 13C  
EXMOD BCM  
OBFRQ 100.40 MHz  
OBSET 125.00 KHz  
OBFIN 10500.00 Hz  
POINT 32768  
FREQU 27118.64 Hz  
SCANS 2048  
ACQTM 1.2083 sec  
PD 1.7920 sec  
PW1 5.10 usec  
IRNUC 1H  
CTEMP 24.4 c  
SLVNT CDCL3  
EXREF 0.00 ppm  
BF 1.20 Hz  
RGAIN 26

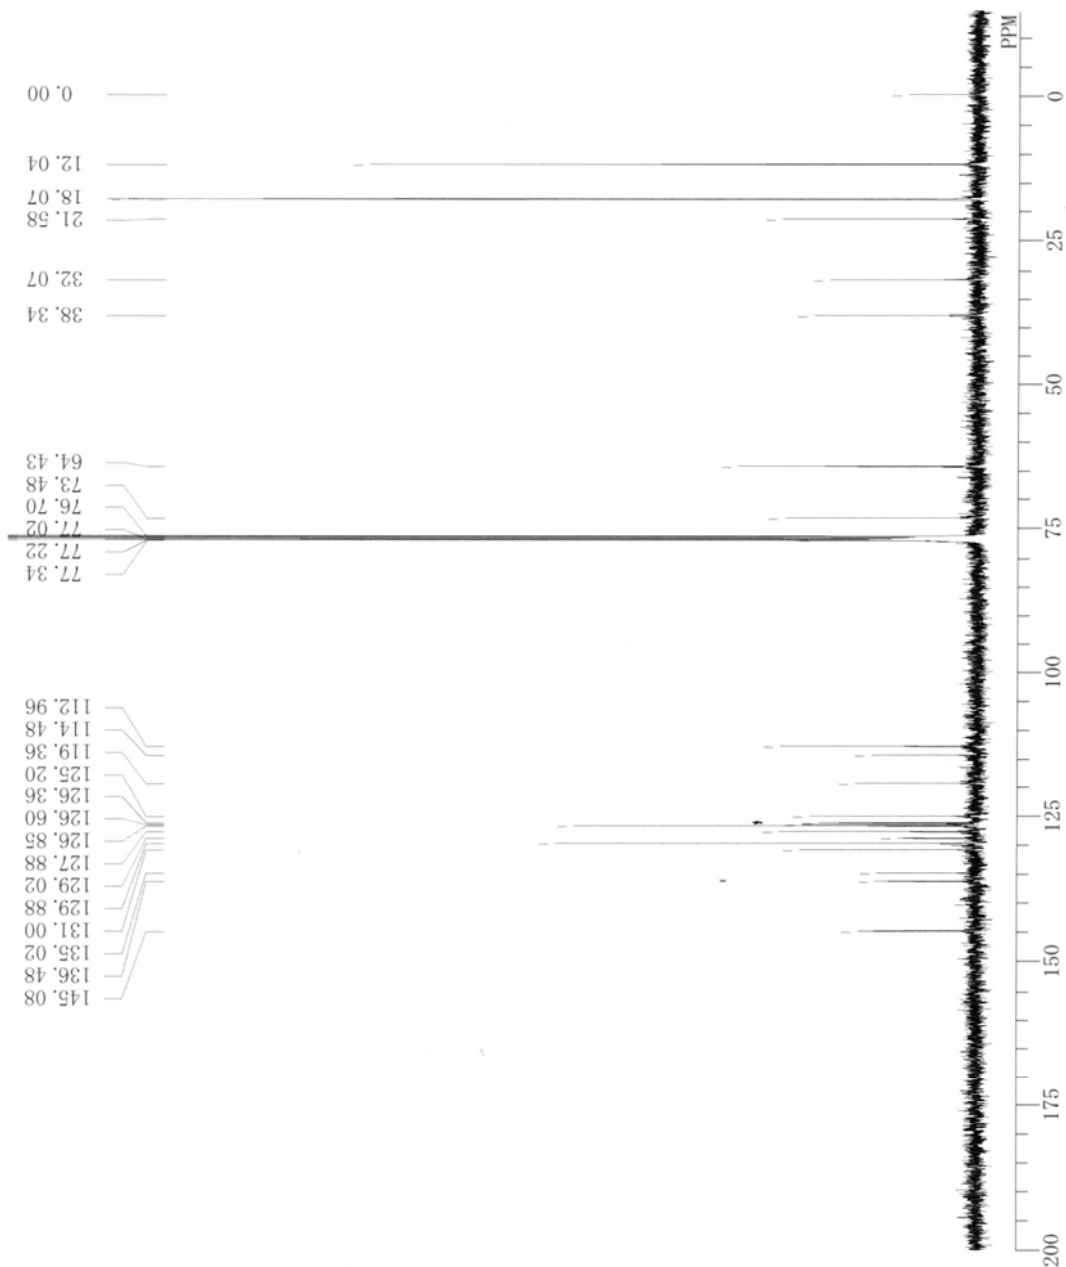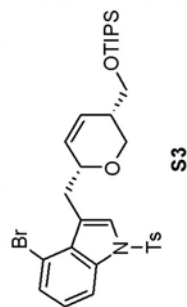

|       |                      |
|-------|----------------------|
| DFILE | I016D18major-a-1.als |
| COMNT | single_pulse         |
| DATIM | 14-12-2007 21:06:33  |
| OBNUC | 1H                   |
| EXMOD | single_pulse.ex2     |
| OBFRQ | 500.16 MHz           |
| OBSET | 2.41 KHz             |
| OBFIN | 6.01 Hz              |
| POINT | 13107                |
| FREQU | 7507.39 Hz           |
| SCANS | 8                    |
| ACQTM | 1.7459 sec           |
| PD    | 5.0000 sec           |
| PW1   | 6.05 usec            |
| IRNUC | 1H                   |
| CTEMP | 26.7 c               |
| SLVNT | CDCl3                |
| EXREF | 0.00 ppm             |
| BF    | 0.12 Hz              |
| RGAIN | 38                   |

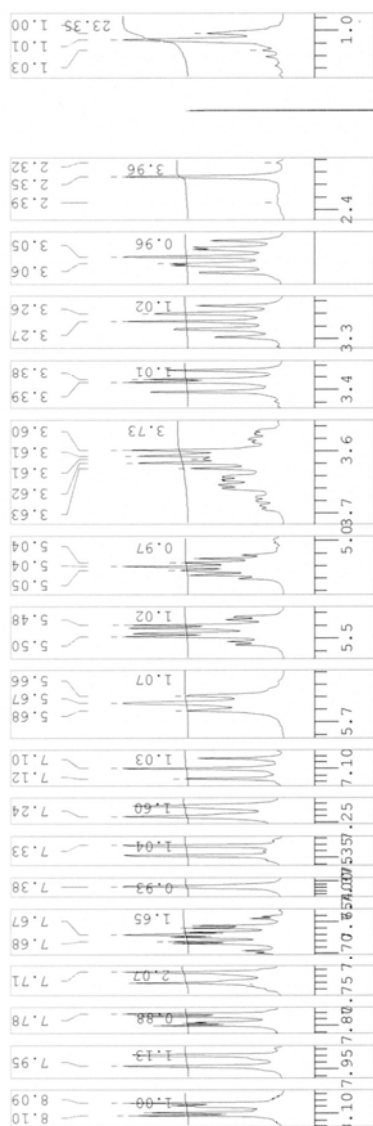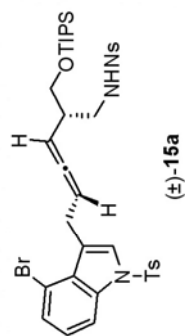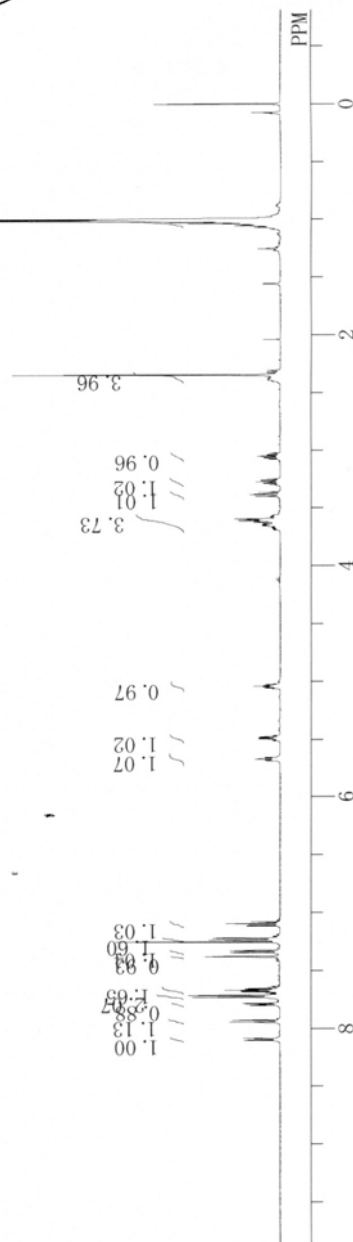

single pulse decoupled gated NOE

| DFILE | 1016D18major                | BCM-1.als |
|-------|-----------------------------|-----------|
| COMNT | single pulse decoupled gate |           |
| DATIM | 13-12-2007 22:17:26         |           |
| OBNUC | 13C                         |           |
| EXMOD | single_pulse_dec            |           |
| OBFRQ | 125.77 MHz                  |           |
| OBSET | 7.87 KHz                    |           |
| OBFIN | 4.21 Hz                     |           |
| POINT | 26214                       |           |
| FREQU | 31446.06 Hz                 |           |
| SCANS | 512                         |           |
| ACQTM | 0.8336 sec                  |           |
| PD    | 2.0000 sec                  |           |
| PW1   | 3.83 usec                   |           |
| IRNUC | 1H                          |           |
| CTEMP | 26.8 c                      |           |
| SLVNT | CDCL3                       |           |
| EXREF | 77.00 ppm                   |           |
| BF    | 0.12 Hz                     |           |
| RGAIN | 60                          |           |

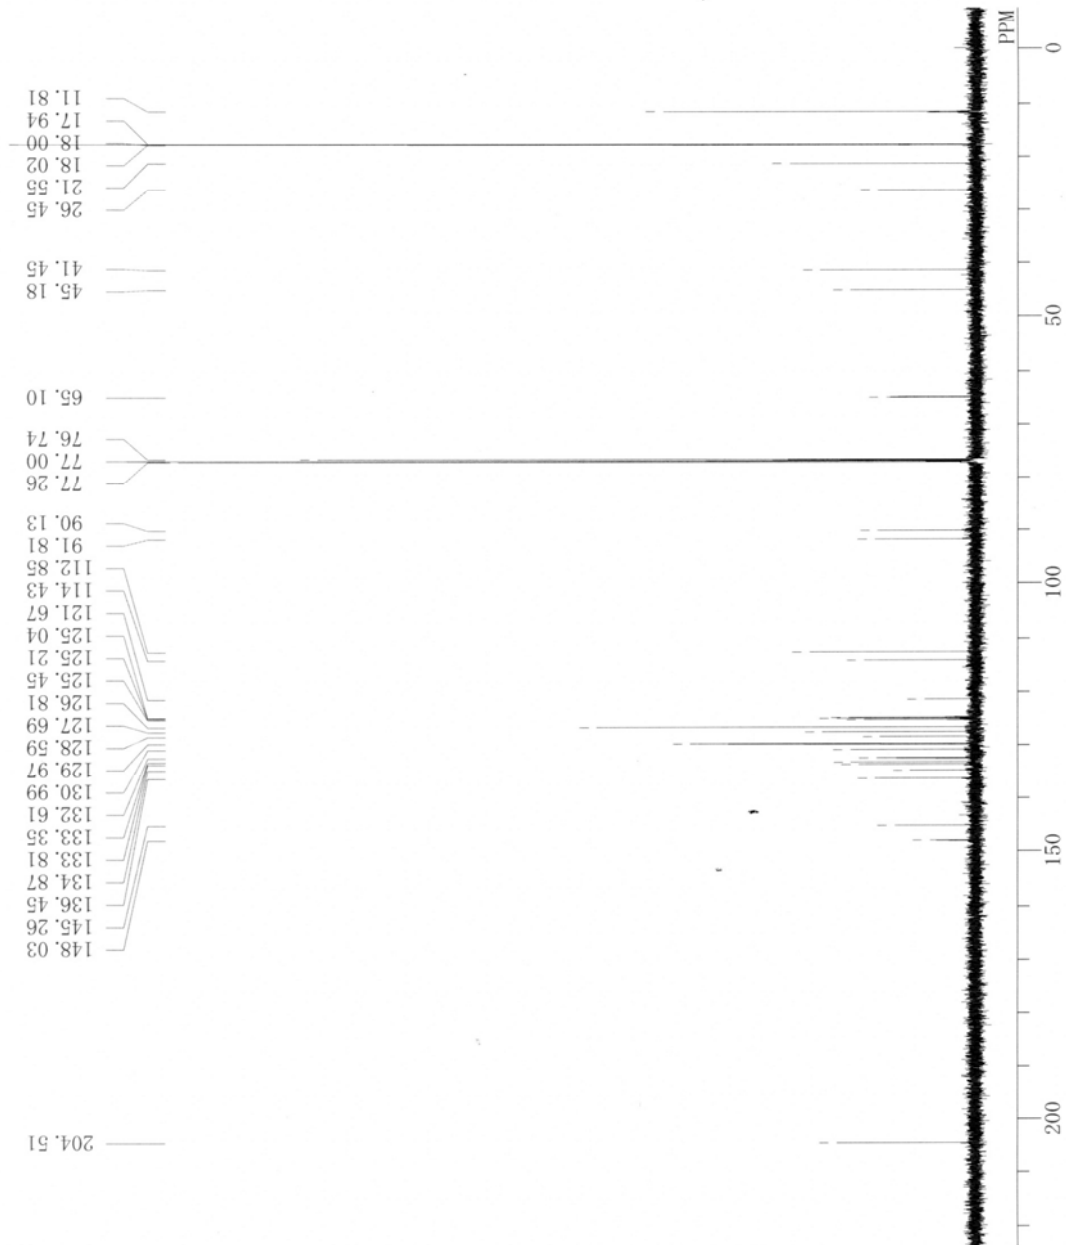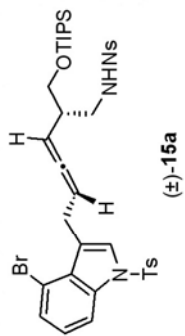

|       |                      |
|-------|----------------------|
| DFILE | I016D19minor-a-1.als |
| COMNT | single_pulse         |
| DATIM | 14-12-2007 20:54:54  |
| ORNUC | 1H                   |
| EXMOD | single_pulse.ex2     |
| OBFRQ | 500.16 MHz           |
| OBSET | 2.41 KHz             |
| OBFIN | 6.01 Hz              |
| POINT | 13107                |
| FREQU | 7507.39 Hz           |
| SCANS | 8                    |
| ACQTM | 1.7459 sec           |
| PD    | 5.0000 sec           |
| PW1   | 6.05 usec            |
| IRNUC | 1H                   |
| CTEMP | 26.6 c               |
| SLVNT | CDCl3                |
| EXREF | 0.00 ppm             |
| BF    | 0.12 Hz              |
| RGAIN | 42                   |

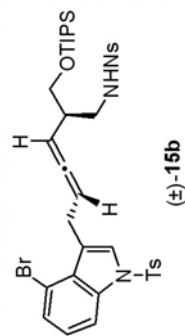

single pulse decoupled gated NOE

DFILE 1016D19minor BCM-1.als  
 COMNT single pulse decoupled gate  
 DATIM 13-12-2007 22:51:48  
 OBNUC 13C  
 EXMOD single\_pulse\_dec  
 OBFREQ 125.77 MHz  
 OBSET 7.87 KHz  
 OBFIN 4.21 Hz  
 POINT 26214  
 FREQU 31446.06 Hz  
 SCANS 512  
 ACQTM 0.8336 sec  
 PD 2.0000 sec  
 PW1 3.83 usec  
 IRNUC 1H  
 CTEMP 26.9 c  
 SLVNT CDCl3  
 EXREF 77.00 ppm  
 BF 0.12 Hz  
 RGAIN 60

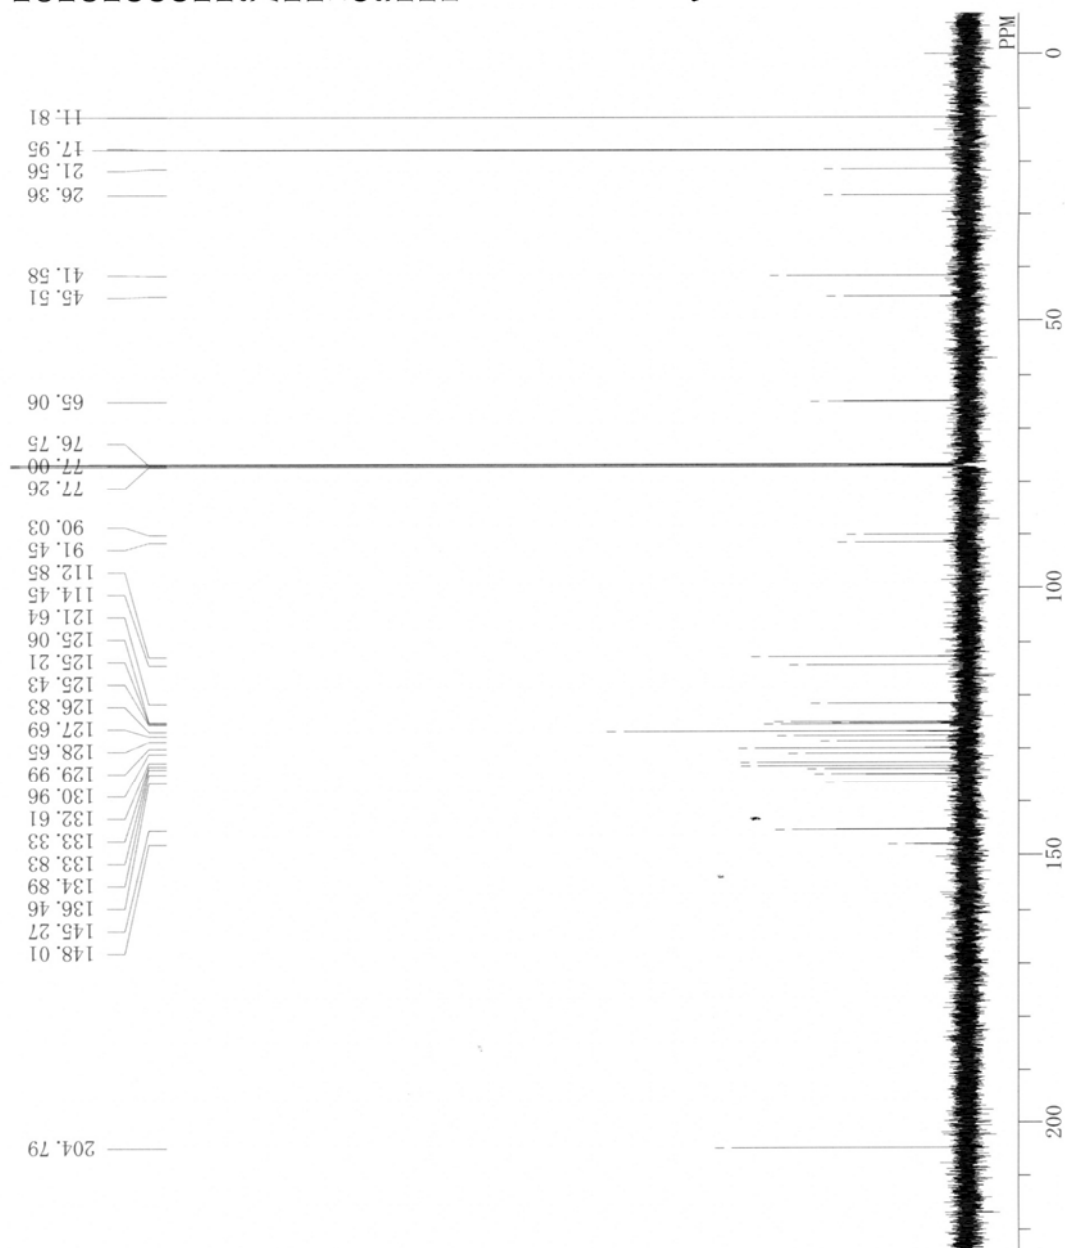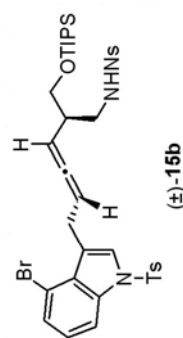

single\_pulse

DFILE 1016D181-1.als  
 COMNT single\_pulse  
 DATIM 09-05-2008 20:21:21  
 OBNUC 1H  
 EXMOD single\_pulse.ex2  
 OBFREQ 500.16 MHz  
 OBSFET 2.41 KHz  
 OBFIN 6.01 Hz  
 POINT 13107  
 FREQU 7507.39 Hz  
 SCANS 8  
 ACQTM 1.7459 sec  
 PD 5.0000 sec  
 PW1 6.05 usec  
 IRNUC 1H  
 CTMP 26.2 c  
 SLVT CDCl3  
 EXREF 0.00 ppm  
 BF 0.12 Hz  
 RGAIN 38

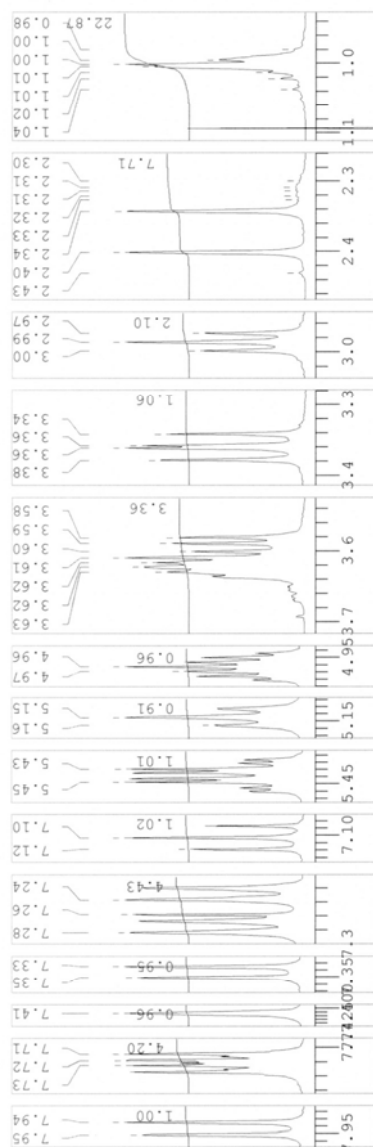

22.87

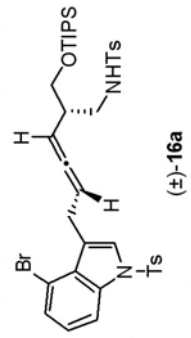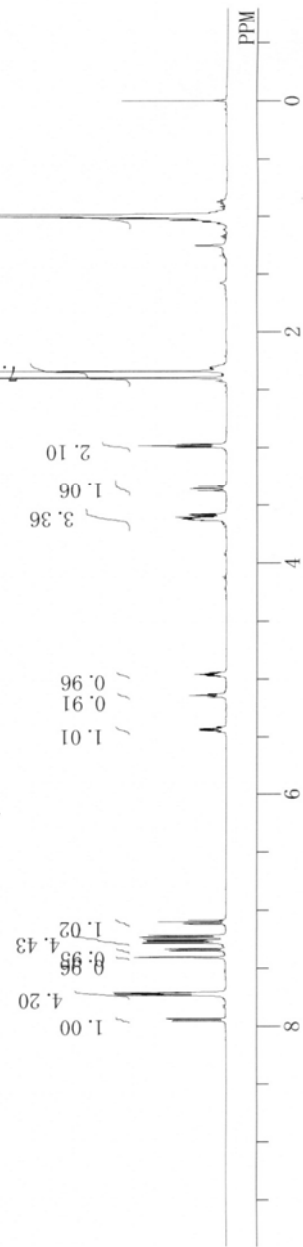

single pulse decoupled gated NOE

DFILE 1016D181 BCM512-1.als  
 COMNT single pulse decoupled gate  
 DATIM 09-05-2008 21:01:49  
 OBNUC 13C  
 EXMOD single\_pulse\_dec  
 OBFRQ 125.77 MHz  
 OBSET 7.87 KHz  
 OBFIN 4.21 Hz  
 POINT 26214  
 FREQU 31446.06 Hz  
 SCANS 500  
 ACQTM 0.8336 sec  
 PD 2.0000 sec  
 PW1 3.83 usec  
 IRNUC 1H  
 CTEMP 26.5 c  
 SLVNT CDCL3  
 EXREF 77.00 ppm  
 BF 0.12 Hz  
 RGAIN 60

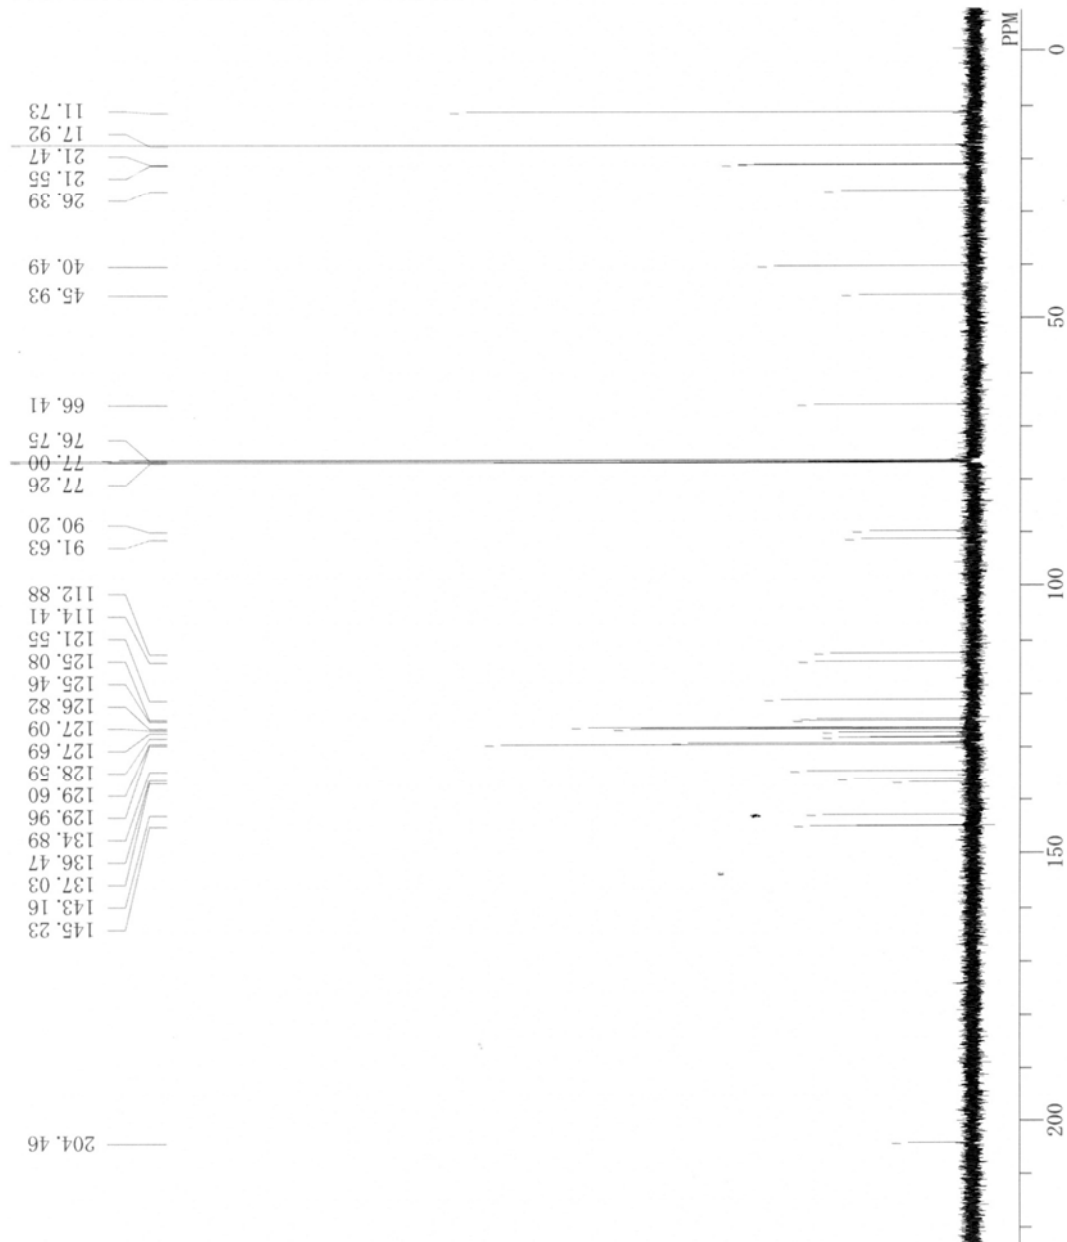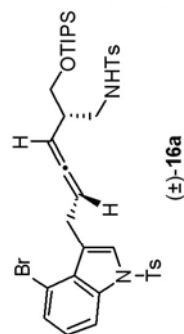

single\_pulse

DFILE 1016D182-1.als  
 COMNT single\_pulse  
 DATIM 10-05-2008 18:22:42  
 OBNUC 1H  
 EXMOD single\_pulse.ex2  
 OBRFQ 500.16 MHz  
 OBSET 2.41 KHz  
 OBFIN 6.01 Hz  
 POINT 13107  
 FREQU 7507.39 Hz  
 SCANS 8  
 ACQTM 1.7459 sec  
 PD 5.0000 sec  
 PW1 6.05 usec  
 IIRUC 1H  
 CTEMP 25.7 c  
 SLVNT CDCl3  
 EXREF 0.00 ppm  
 BF 0.12 Hz  
 RGAIN 38

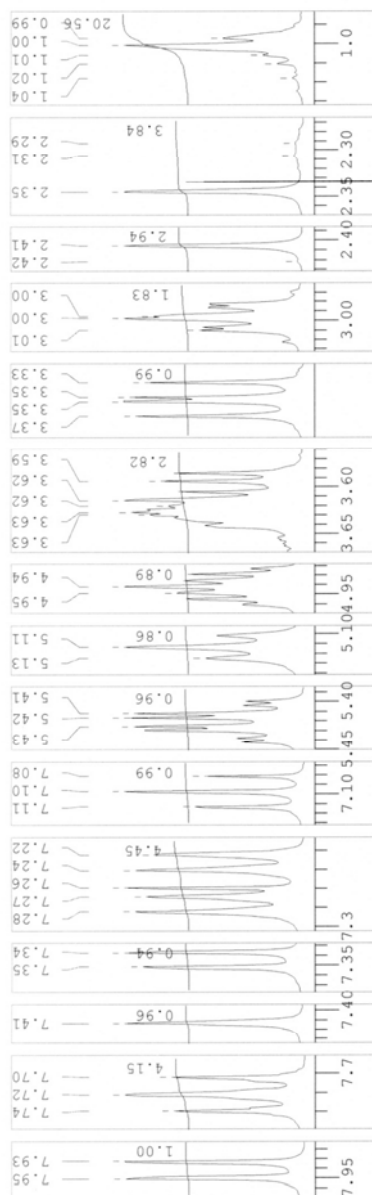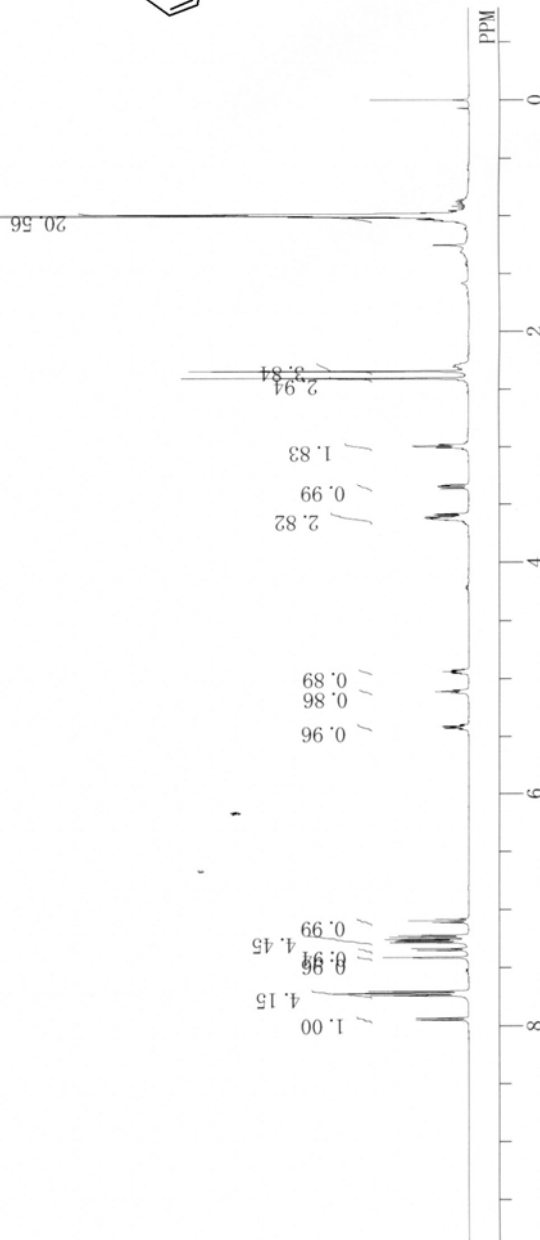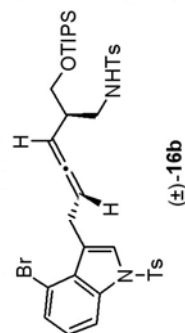



single pulse decoupled gated NOE

DFILE 1016D182 BCM-1.als  
 COMNT single pulse decoupled gate  
 DATIM 10-05-2008 19:04:01  
 OBNUC 13C  
 EXMOD single\_pulse\_dec  
 OBFREQ 125.77 MHz  
 OBSFET 7.87 KHz  
 OBSFIN 4.21 Hz  
 POINT 26214  
 FREQU 31446.06 Hz  
 SCANS 500  
 ACQTM 0.8336 sec  
 PD 2.0000 sec  
 PW1 3.83 usec  
 IRNUC 1H  
 CTEMP 26.2 c  
 SLVNT CDCL3  
 EXREF 77.00 ppm  
 BF 0.12 Hz  
 RGAIN 60

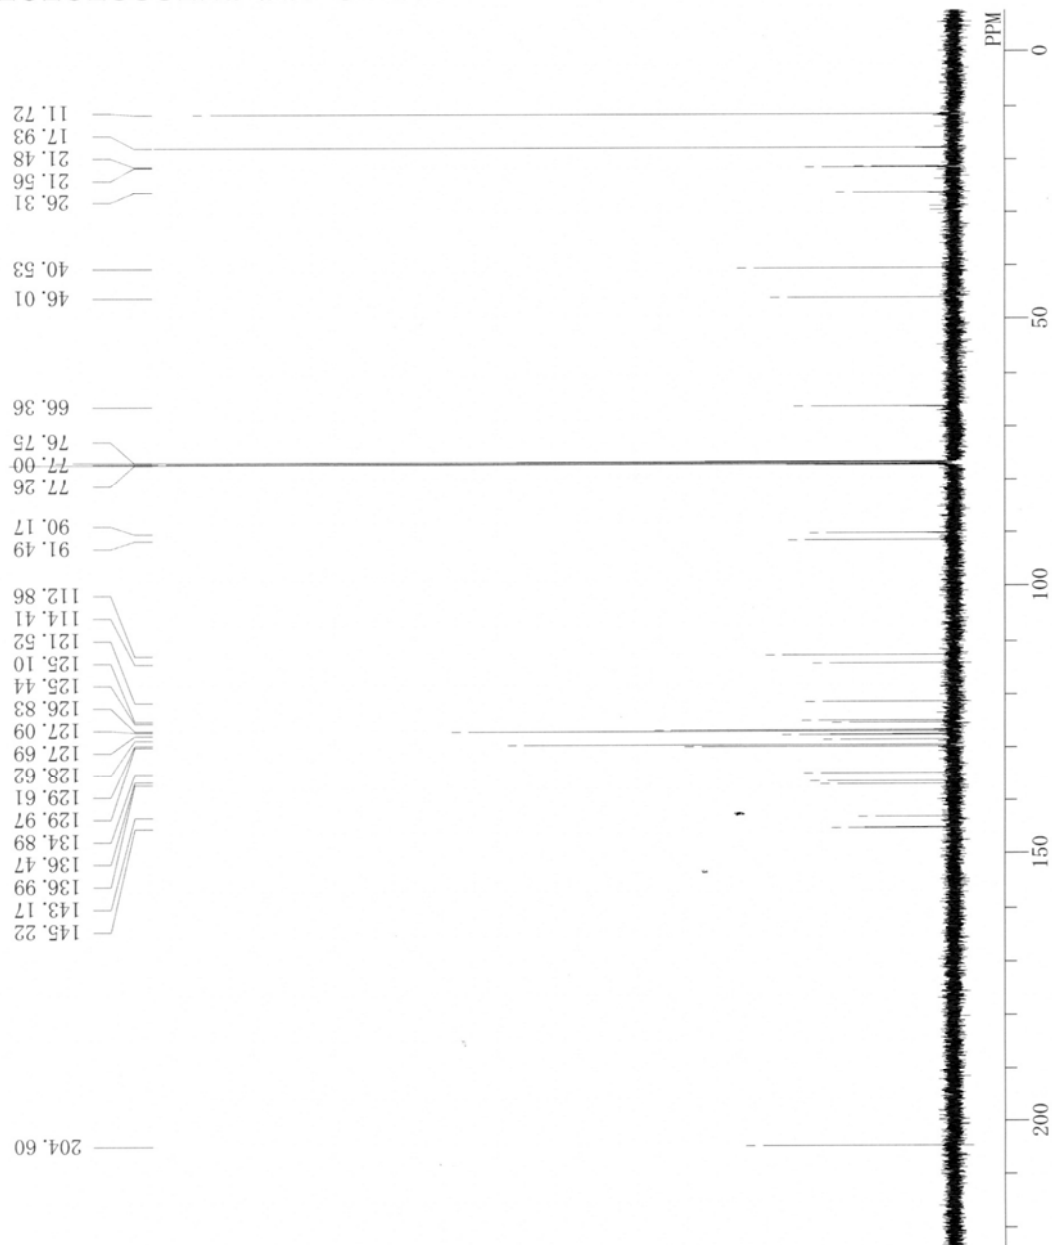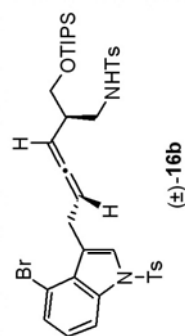

single\_pulse

DFILE 1016C160 080201 H-1.als  
 COMNT single\_pulse  
 DATIM 01-02-2008 15:34:49  
 OBNUC 1H  
 EXMOD single\_pulse.ex2  
 OBRFQ 500.16 MHz  
 OBSFQ 2.41 KHz  
 OBFIN 6.01 Hz  
 POINT 13107  
 FREQU 7507.39 Hz  
 SCANS 8  
 ACQTM 1.7459 sec  
 PD 5.0000 sec  
 PW1 6.05 usec  
 IIRUC 1H  
 CTMP 28.2 c  
 SLVNT CDCl3  
 EXREF 0.00 ppm  
 BF 0.12 Hz  
 RGAIN 48

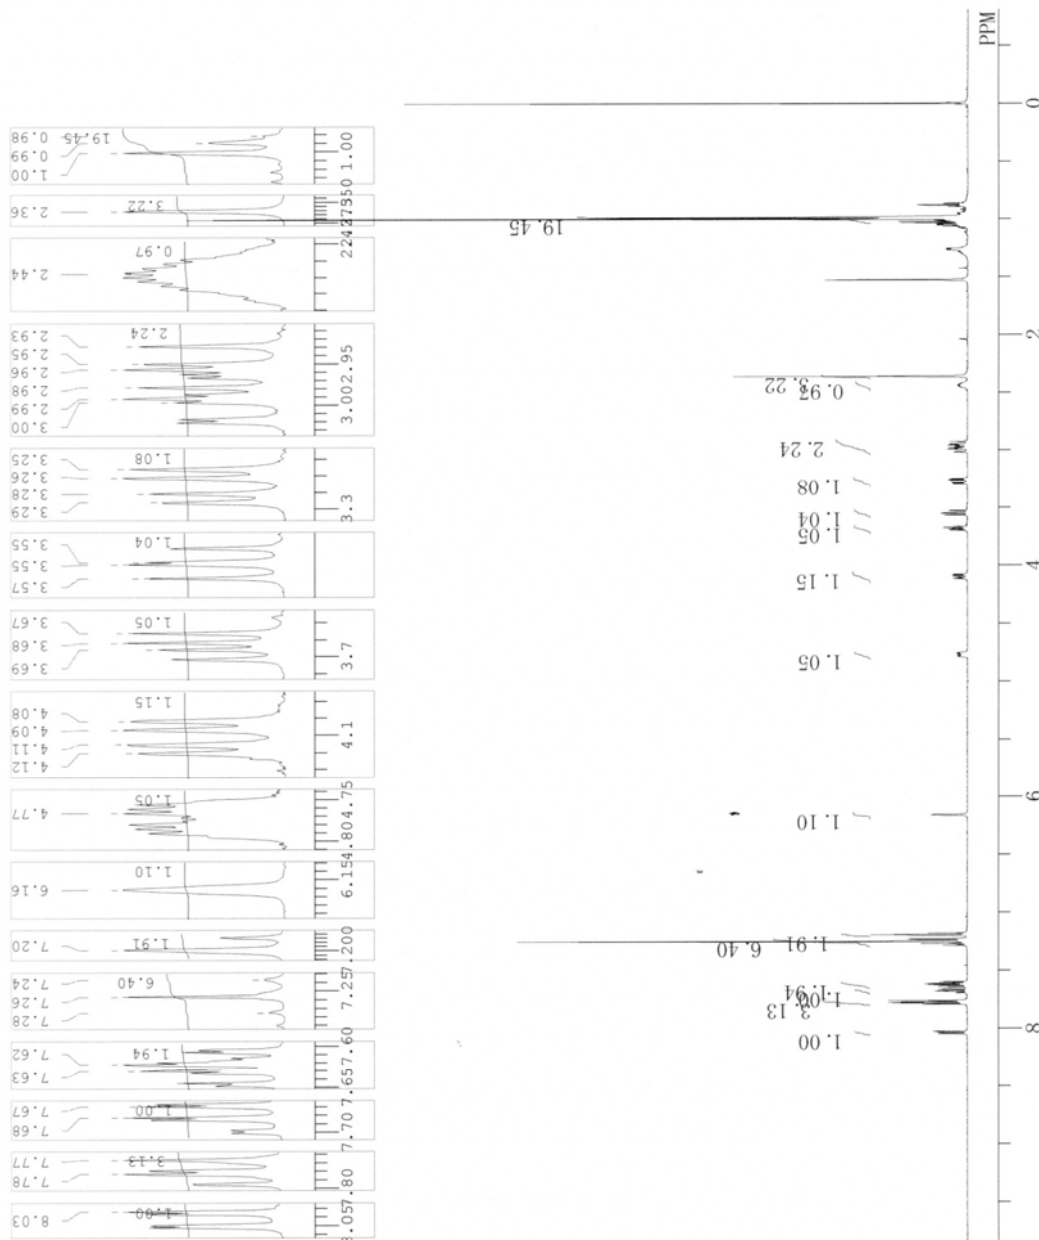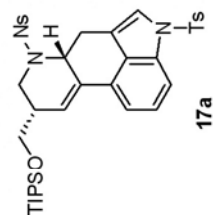

single pulse decoupled gated NOE

DFILE 1016D50 080201 BCM-1.als  
 COMNT single pulse decoupled gate  
 DATIM 01-02-2008 21:37:25  
 OBNUC <sup>13</sup>C  
 EXMOD single\_pulse\_dec  
 OBFREQ 125.77 MHz  
 OBSET 7.87 KHz  
 OBFIN 4.21 Hz  
 POINT 26214  
 FREQU 31446.06 Hz  
 SCANS 512  
 ACQTM 0.8336 sec  
 PD 2.0000 sec  
 PW1 3.83 usec  
 IIRNUC <sup>1</sup>H  
 CTEMP 26.7 c  
 SLVNT CDCl<sub>3</sub>  
 EXREF 77.00 ppm  
 BF 0.12 Hz  
 RGAIN 60

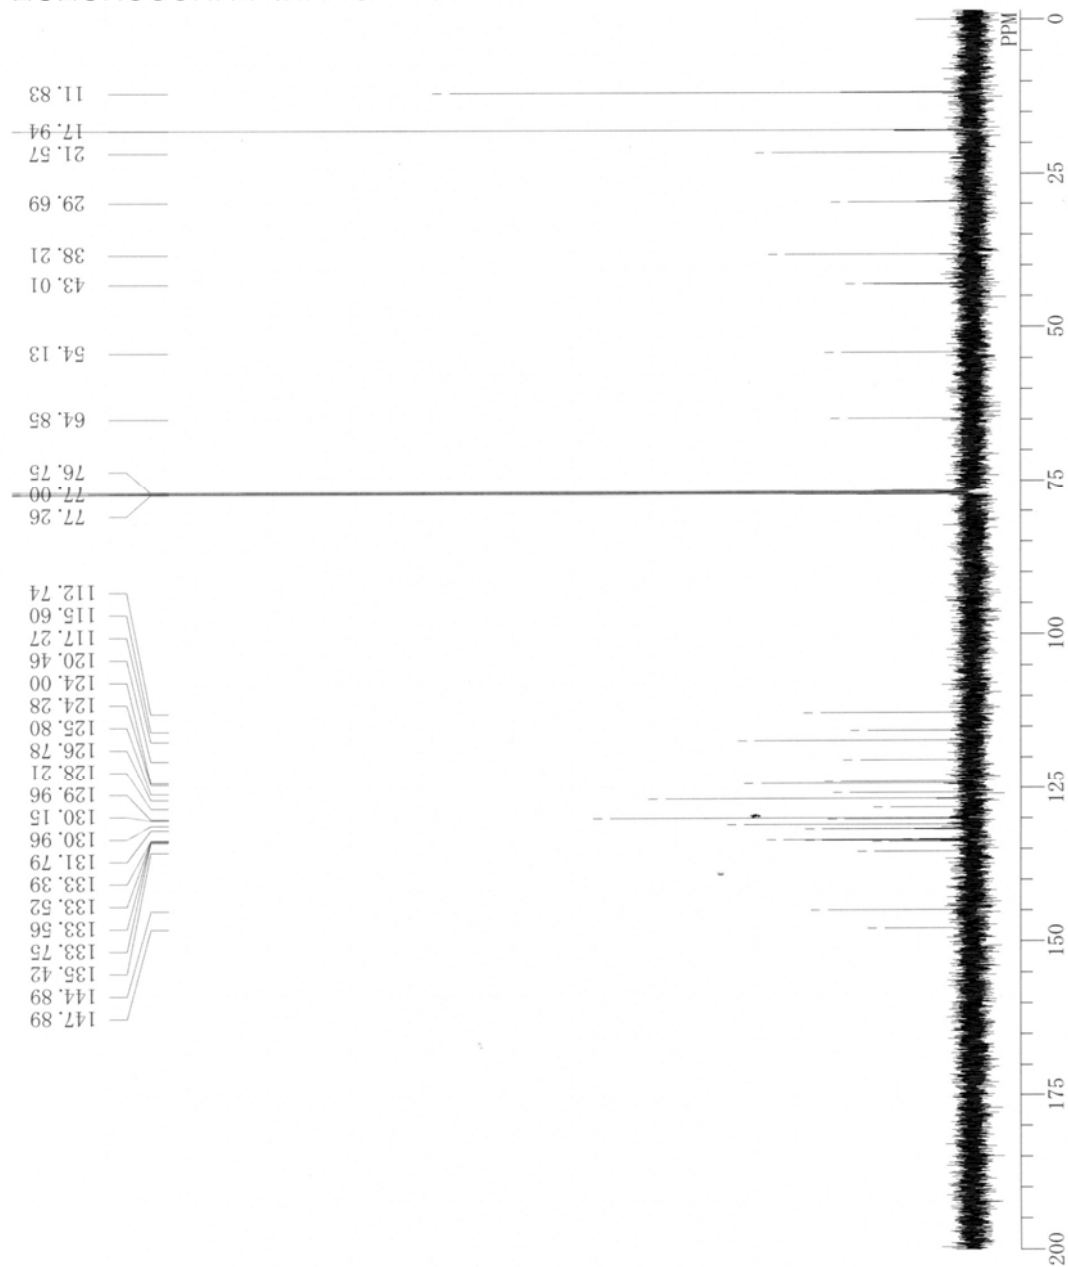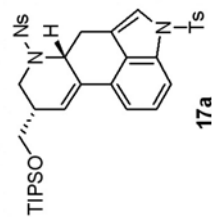

single\_pulse

DFILE 1016D113 080308-1.als  
 COMNT single\_pulse  
 DATIM 08-03-2008 14:49:28  
 OBNUC 1H  
 EXMOD single\_pulse.ex2  
 OBRFQ 500.16 MHz  
 OBSET 2.41 KHz  
 OBFIN 6.01 Hz  
 POINT 13107  
 FREQU 7507.39 Hz  
 SCANS 8  
 ACQTM 1.7459 sec  
 PD 5.0000 sec  
 PW1 6.05 usec  
 1H  
 IRNUC 25.8 c  
 CTMP CDCL3  
 SLVNT  
 EXREF 0.00 ppm  
 BF 0.12 Hz  
 RGAIN 40

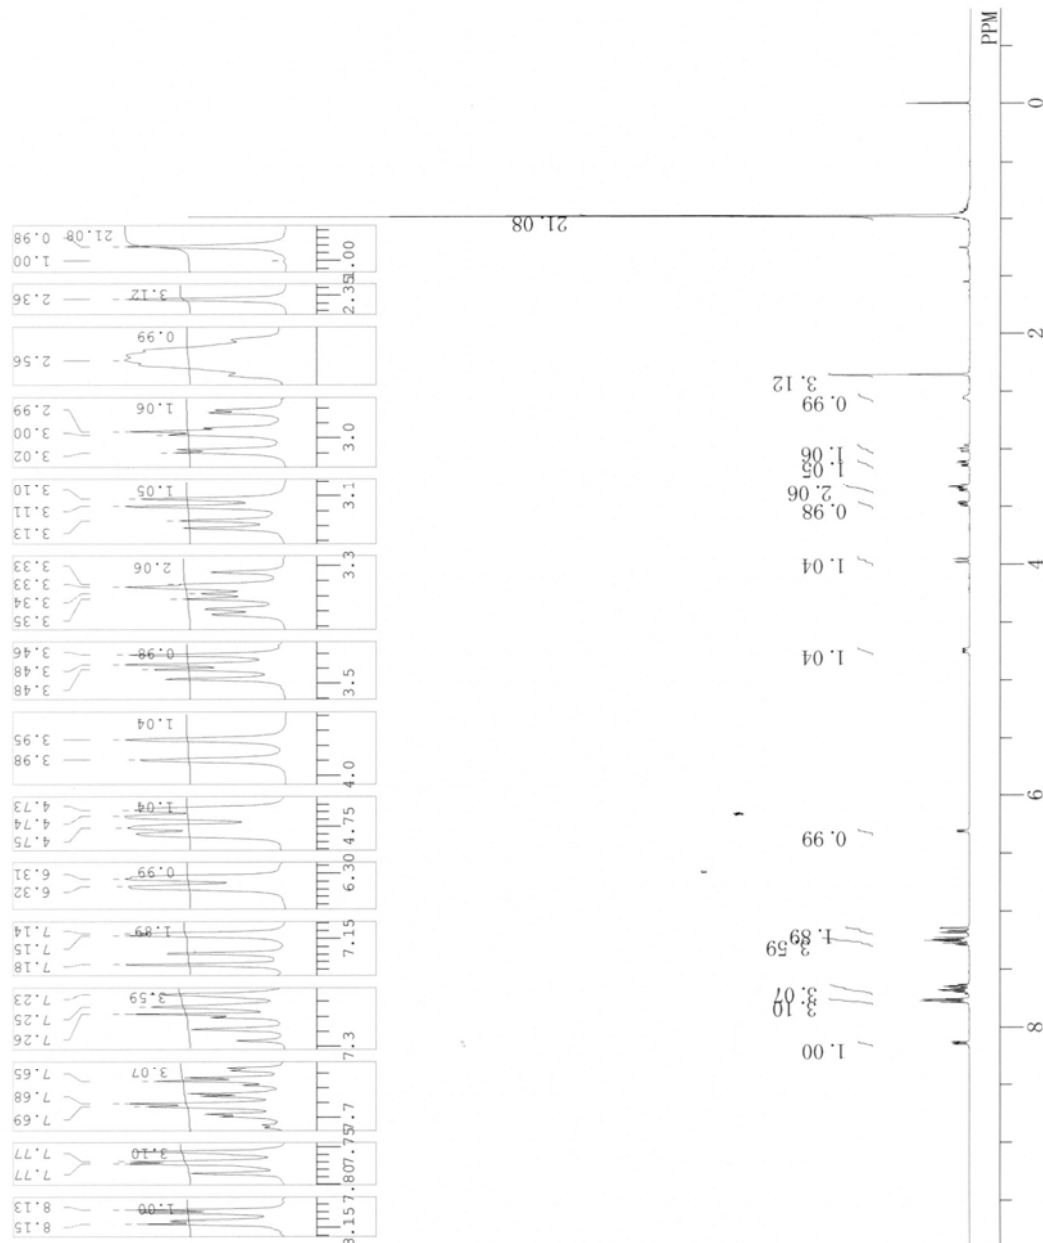

single pulse decoupled gated NOE

DFILE 1016D113 080308 BCM-1.als  
 COMNT single pulse decoupled gate  
 DATIM 08-03-2008 15:37:47  
 OBNUC <sup>13</sup>C  
 EXMOD single\_pulse\_dec  
 OBFREQ 125.77 MHz  
 OBSET 7.87 KHz  
 OBFIN 4.21 Hz  
 POINT 26214  
 FREQU 31446.06 Hz  
 SCANS 1000  
 ACQTM 0.8336 sec  
 PD 2.0000 sec  
 PW1 3.83 usec  
 IRNUC <sup>1</sup>H  
 CTEMP 25.9 c  
 SLVNT CDCl<sub>3</sub>  
 EXREF 77.00 ppm  
 BF 0.12 Hz  
 RGAIN 60

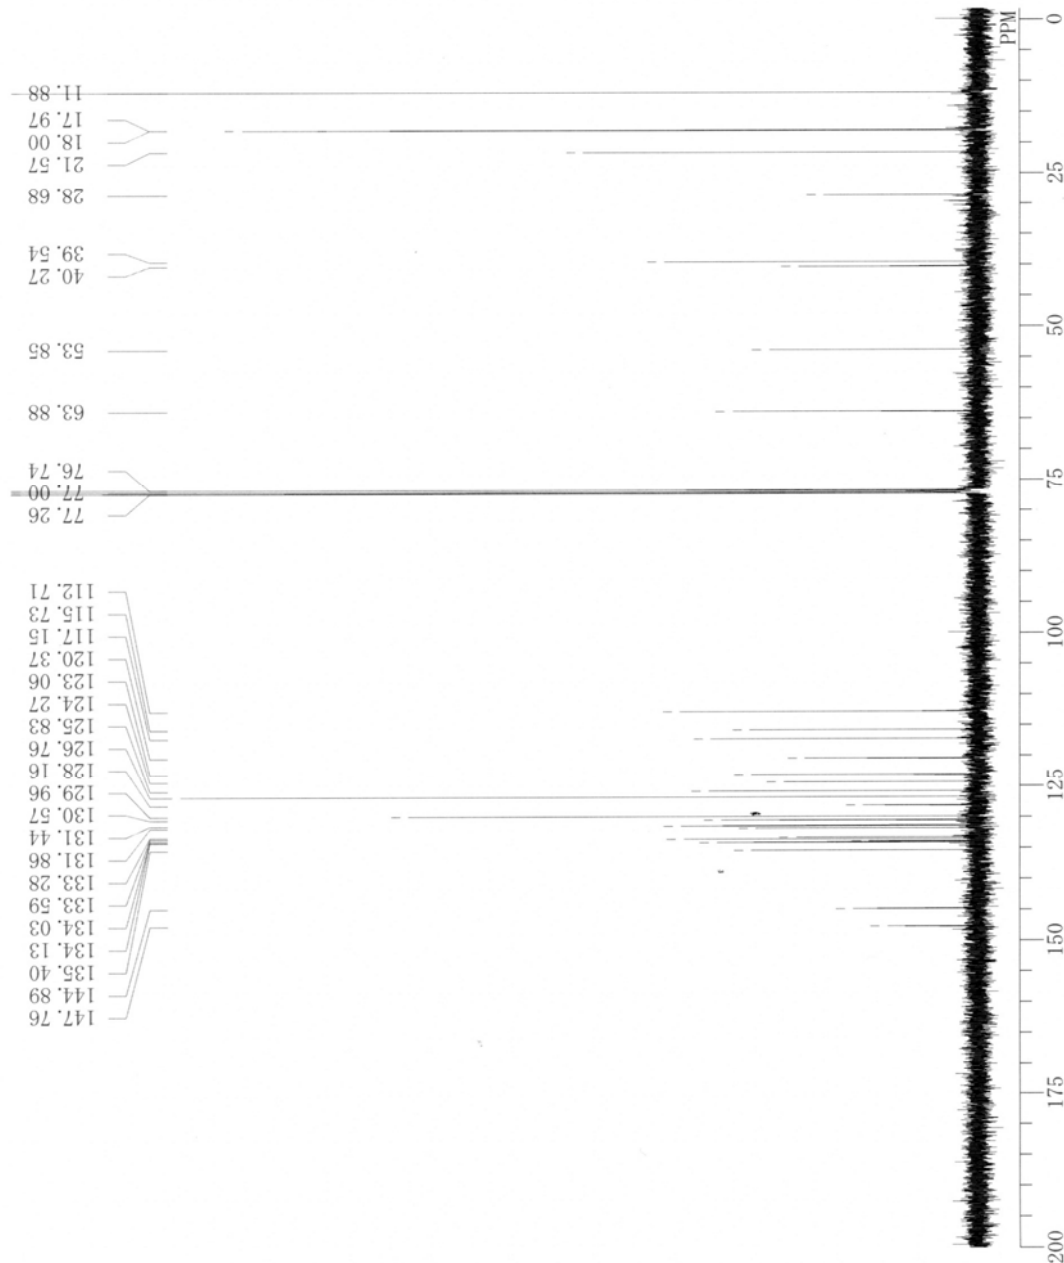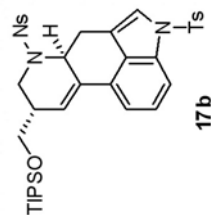

single\_pulse

DFILE 1016D192-1.als  
 COMNT single\_pulse  
 DATIM 19-05-2008 10:45:05  
 OBNUC 1H  
 EXMOD single\_pulse,ex2  
 OBRFQ 500.16 MHz  
 OBSST 2.41 KHz  
 OBFIN 6.01 Hz  
 POINT 13107  
 FREQU 7507.39 Hz  
 SCANS 8  
 ACQTM 1.7459 sec  
 PD 5.0000 sec  
 PW1 6.05 usec  
 IRNUC 1H  
 CTEMP 22.7 c  
 SLVNT CDCl3  
 EXREF 0.00 ppm  
 BF 0.12 Hz  
 RGAIN 40

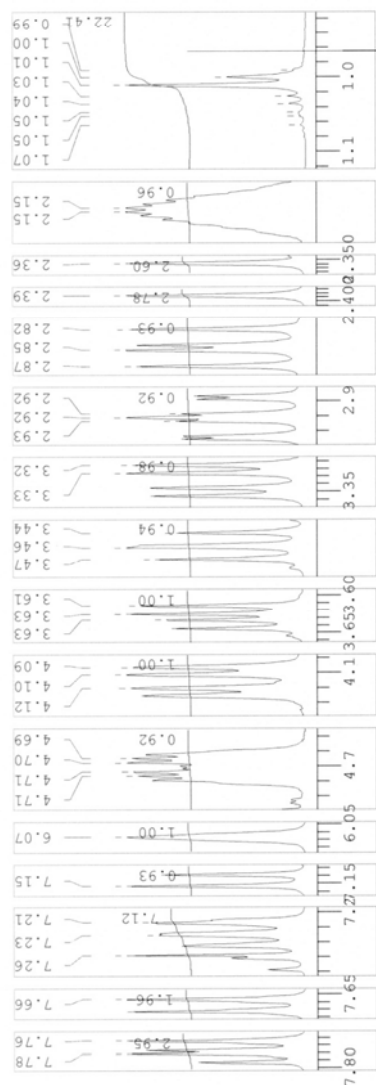

22.41

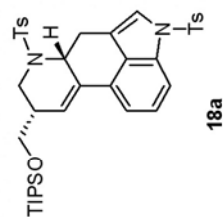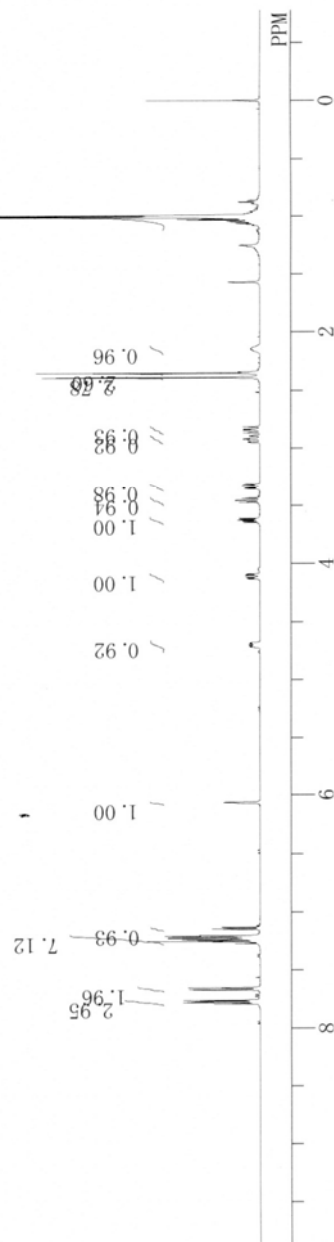

single pulse decoupled gated NOE

DFILE 1016D192BCM 080520-1.als  
 COMNT single pulse decoupled gate  
 DATIM 21-05-2008 00:29:35  
 OBNUC <sup>13</sup>C  
 EXMOD single\_pulse\_dec  
 OBFREQ 125.77 MHz  
 OBSET 7.87 KHz  
 OBFIN 4.21 Hz  
 POINT 26214  
 FREQU 31446.06 Hz  
 SCANS 800  
 ACQTM 0.8336 sec  
 PD 2.0000 sec  
 PW1 3.83 usec  
 IRNUC <sup>1</sup>H  
 CTEMP 26.2 c  
 SLVNT CDCL3  
 EXREF 77.00 ppm  
 BF 0.12 Hz  
 RGAIN 60

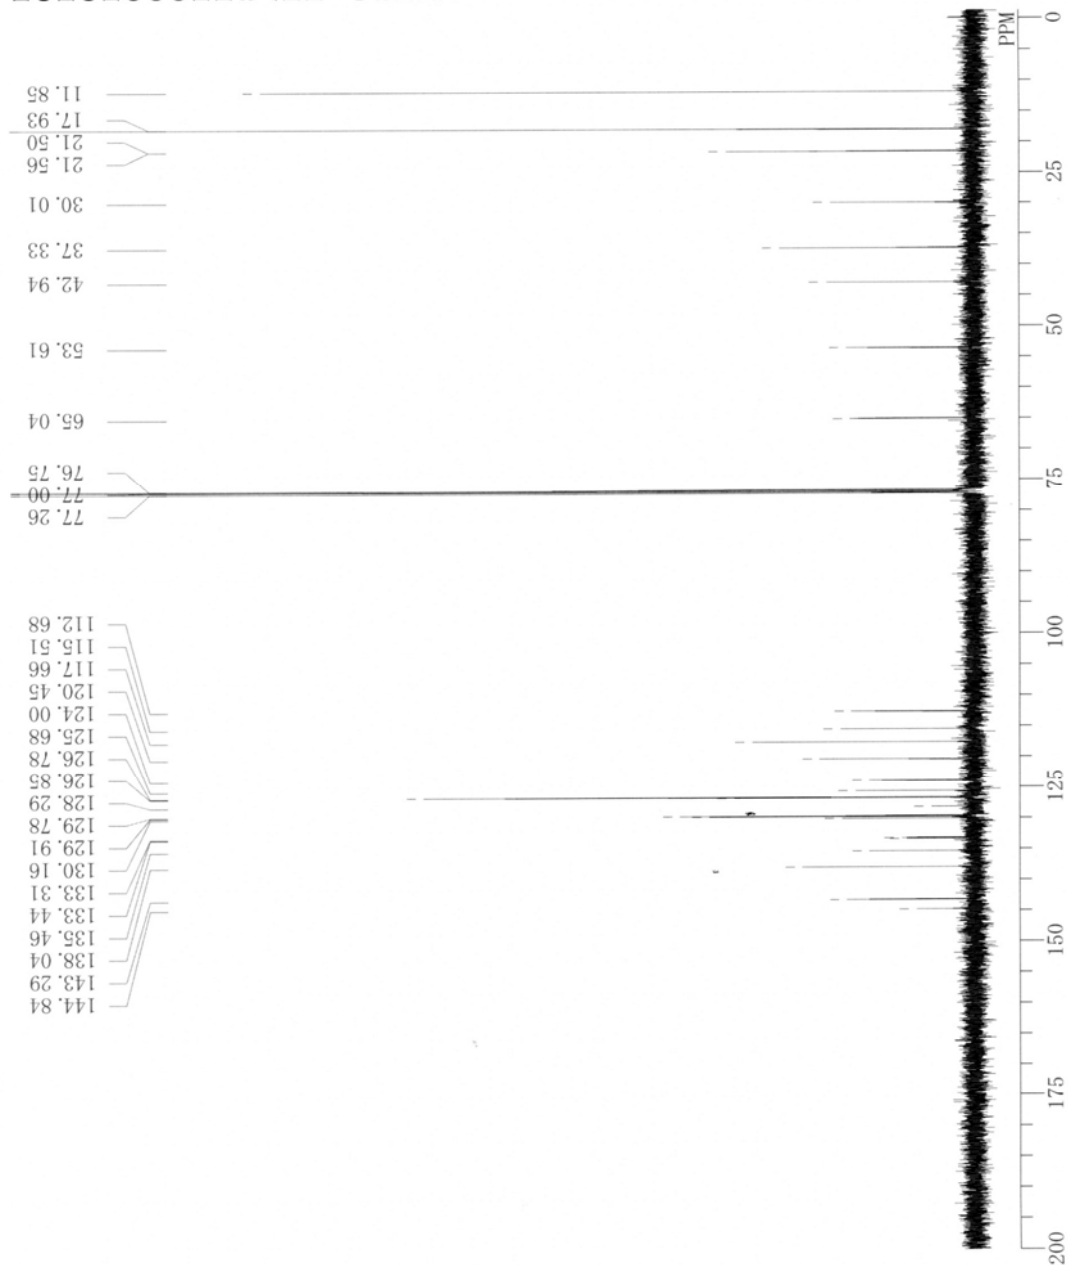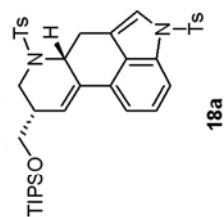

single\_pulse

DFILE 1016D197-1.als  
 COMNT single\_pulse  
 DATIM 22-05-2008 10:15:09  
 OBNUC 1H  
 EXMOD single\_pulse.ex2  
 OBRFQ 500.16 MHz  
 OBSET 2.41 KHz  
 OBFIN 6.01 Hz  
 POINT 13107  
 FREQU 7507.39 Hz  
 SCANS 8  
 ACQTM 1.7459 sec  
 PD 5.0000 sec  
 PW1 6.05 usec  
 IRNUC 1H  
 CTMP 26.0 c  
 SLVNT CDCl3  
 EXREF 0.00 ppm  
 BF 0.12 Hz  
 RGAIN 40

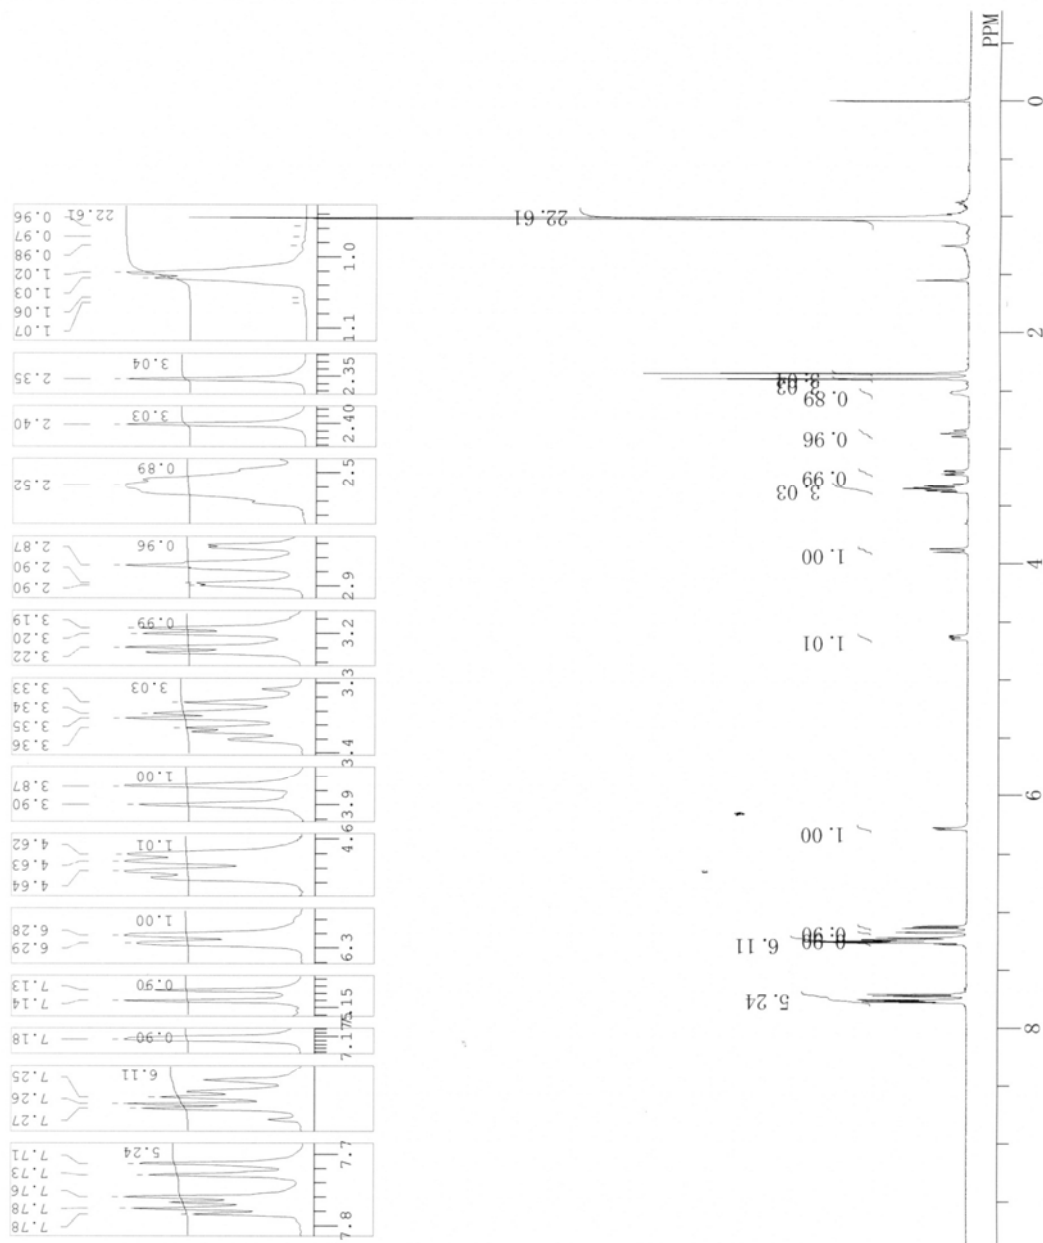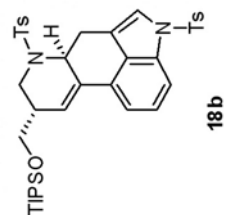



single pulse decoupled gated NOE

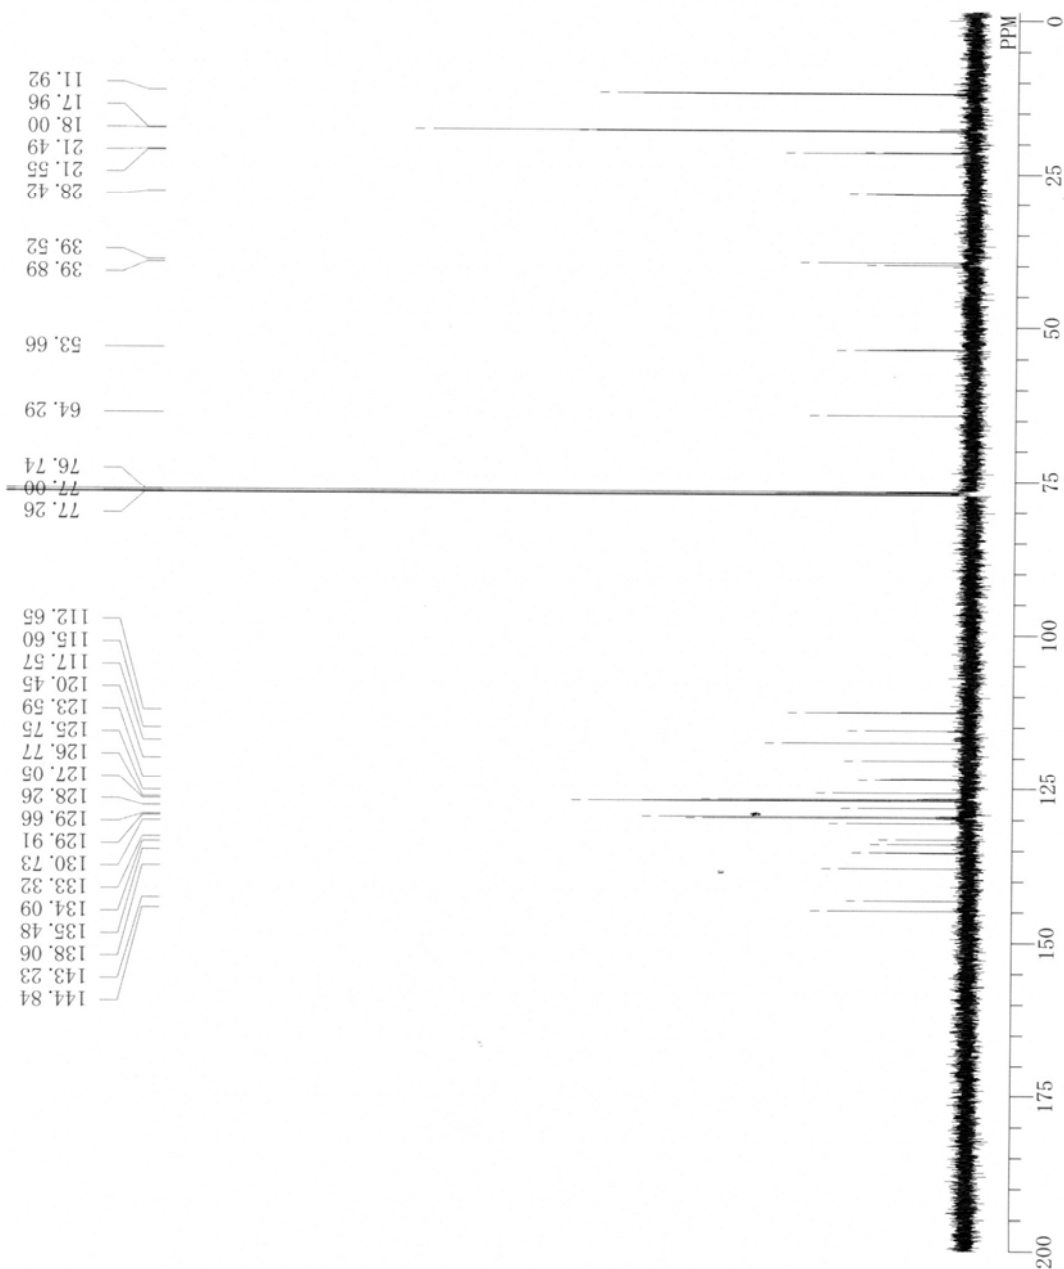

DFILE 1016D197BCM-1.als  
 COMNT single pulse decoupled gate  
 DATIM 22-05-2008 11:40:09  
 OBNUC 13C  
 EXMOD single\_pulse\_dec  
 OBFREQ 125.77 MHz  
 OBSET 7.87 KHz  
 OBFIN 4.21 Hz  
 POINT 26214  
 FREQU 31446.06 Hz  
 SCANS 1024  
 ACQTM 0.8336 sec  
 PD 2.0000 sec  
 PW1 3.83 usec  
 IRNUC 1H  
 CTEMP 26.8 c  
 SLVNT CDCl3  
 EXREF 77.00 ppm  
 BF 0.12 Hz  
 RGAIN 60

DFILE 1016C157-1Date.als  
 COMNT  
 DATIM Fri Oct 12 10:47:16 2007  
 ORNUC 1H  
 EXMOD NON  
 OFFRQ 399.65 MHz  
 OBSET 124.00 KHz  
 OFBIN 10500.00 Hz  
 POINT 32768  
 FREQU 7992.01 Hz  
 SCANS 8  
 ACQTM 4.1001 sec  
 PD 2.9000 sec  
 PW1 5.50 usec  
 IRNUC 1H  
 CTEMP 22.9 c  
 SLVNT CDCL3  
 EXREF 0.00 ppm  
 BF 0.12 Hz  
 RGAIN 14

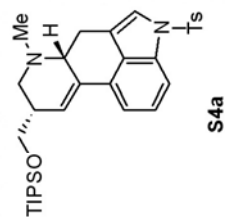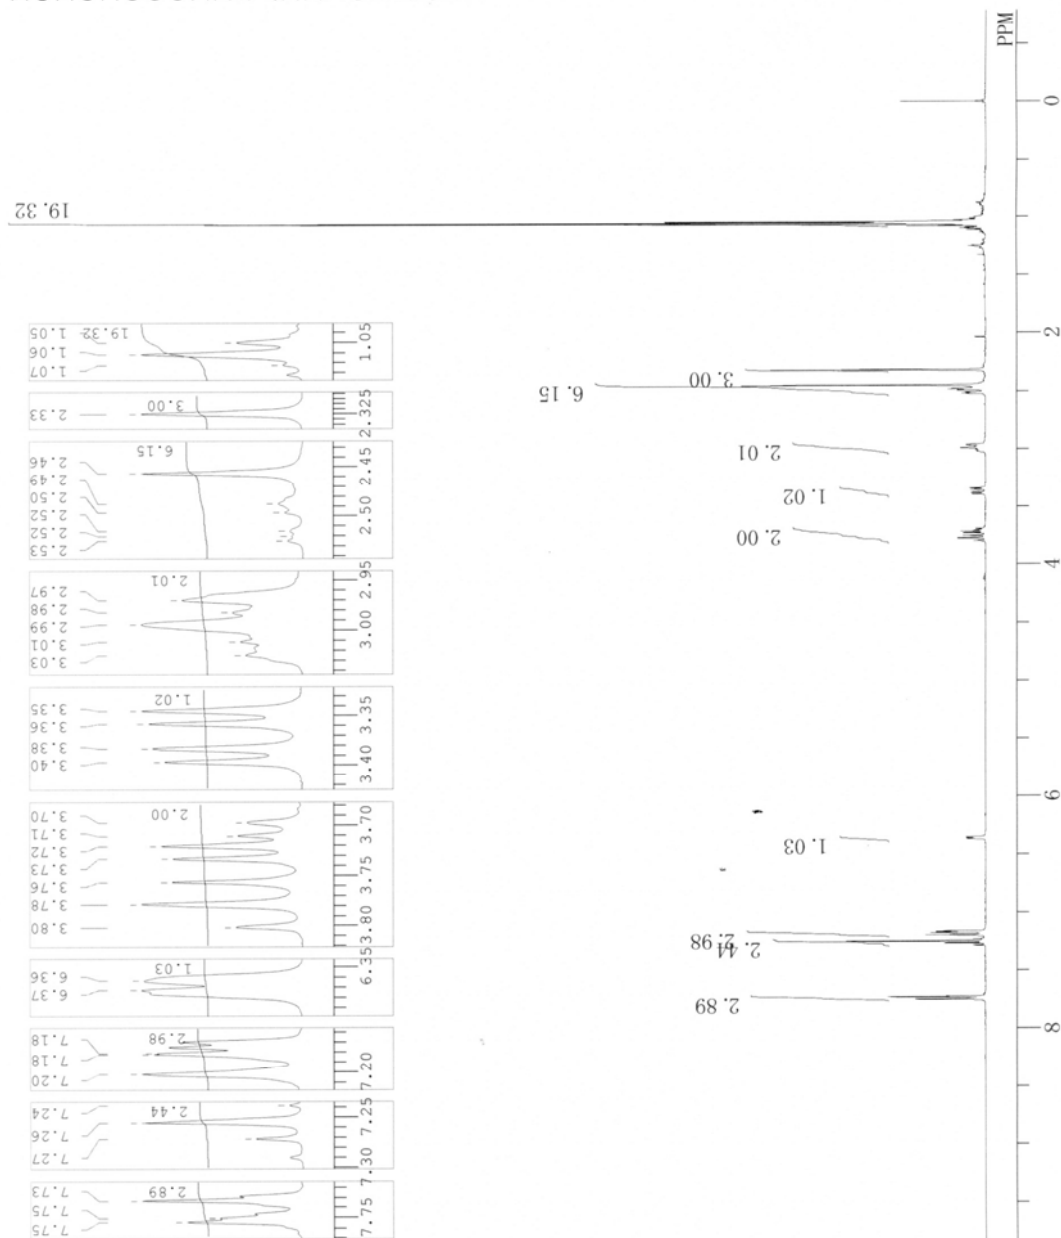

single pulse decoupled gated NOE

DFILE 1016C157-1BCM-1.als  
 COMNT single pulse decoupled gate  
 DATIM 12-10-2007 13:37:16  
 OBNUC <sup>13</sup>C  
 EXMOD single\_pulse\_dec  
 OBFREQ 125.77 MHz  
 OBSET 7.87 KHz  
 OBFIN 4.21 Hz  
 POINT 26214  
 FREQU 31446.06 Hz  
 SCANS 512  
 ACQTM 0.8336 sec  
 PD 2.0000 sec  
 PW1 3.83 usec  
 IIRNUC <sup>1</sup>H  
 CTEMP 24.6 c  
 SLVNT CDCl<sub>3</sub>  
 EXREF 77.00 ppm  
 BF 0.12 Hz  
 RGAIN 60

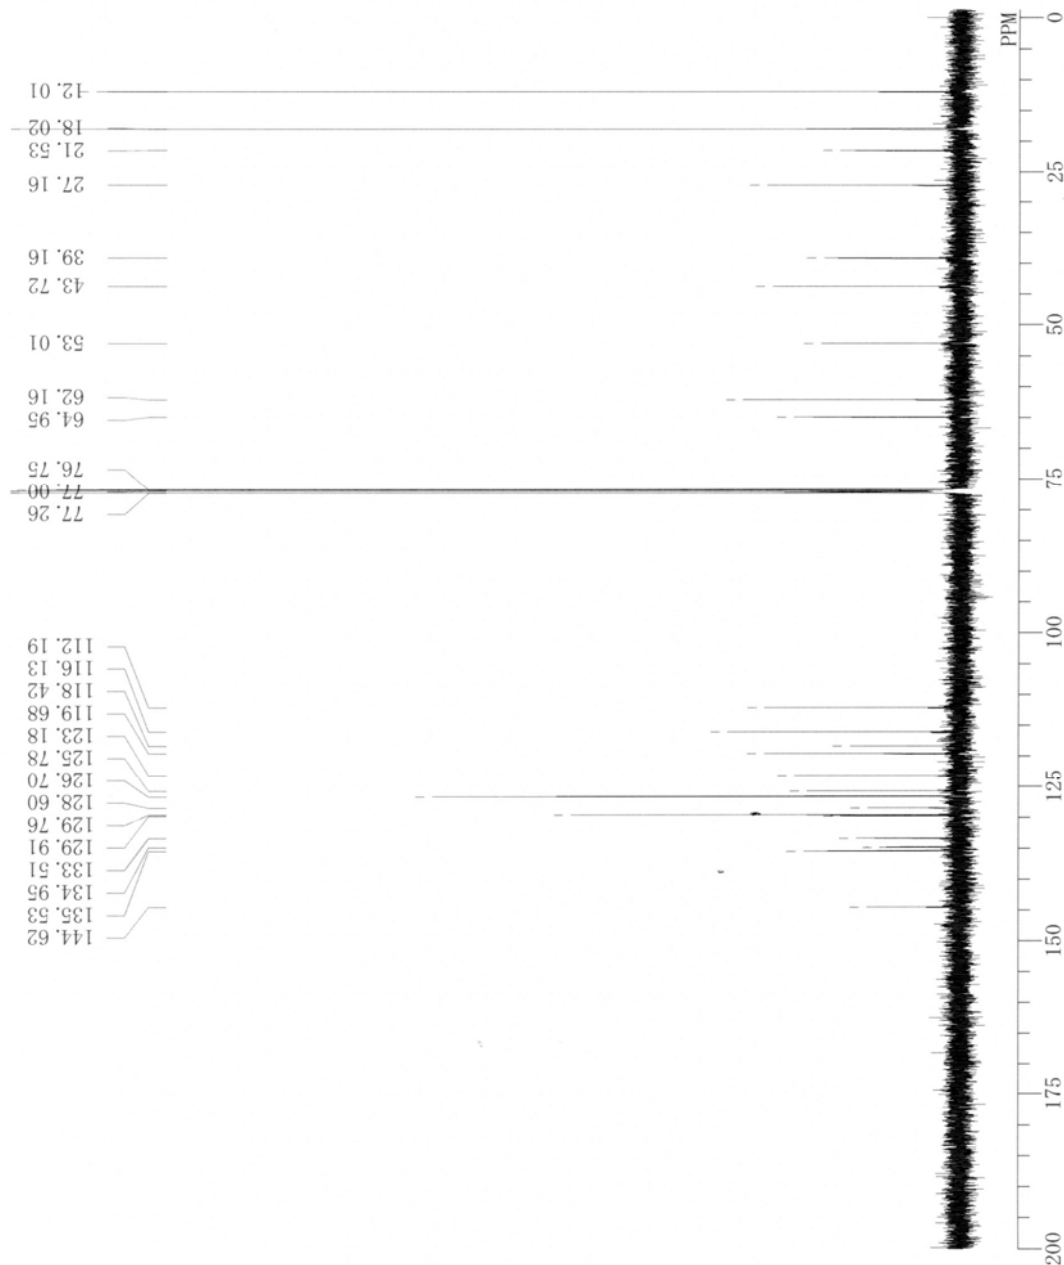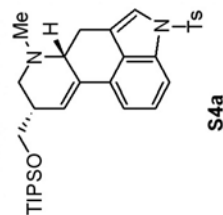

DFILE 1016C157-2Date.als  
 COM1  
 DATIM Fri Oct 12 10:54:24 2007  
 OBNUC 1H  
 EXMOD NON  
 OBFREQ 399.65 MHz  
 OBSET 124.00 KHz  
 OBFIN 10500.00 Hz  
 POINT 32768  
 FREQU 7992.01 Hz  
 SCANS 8  
 ACQTM 4.1001 sec  
 PD 2.9000 sec  
 PW1 5.50 usec  
 IRNUC 1H  
 CTEMP 22.9 c  
 SLVNT CDCl3  
 EXREF 0.00 ppm  
 BF 0.12 Hz  
 RGAIN 16

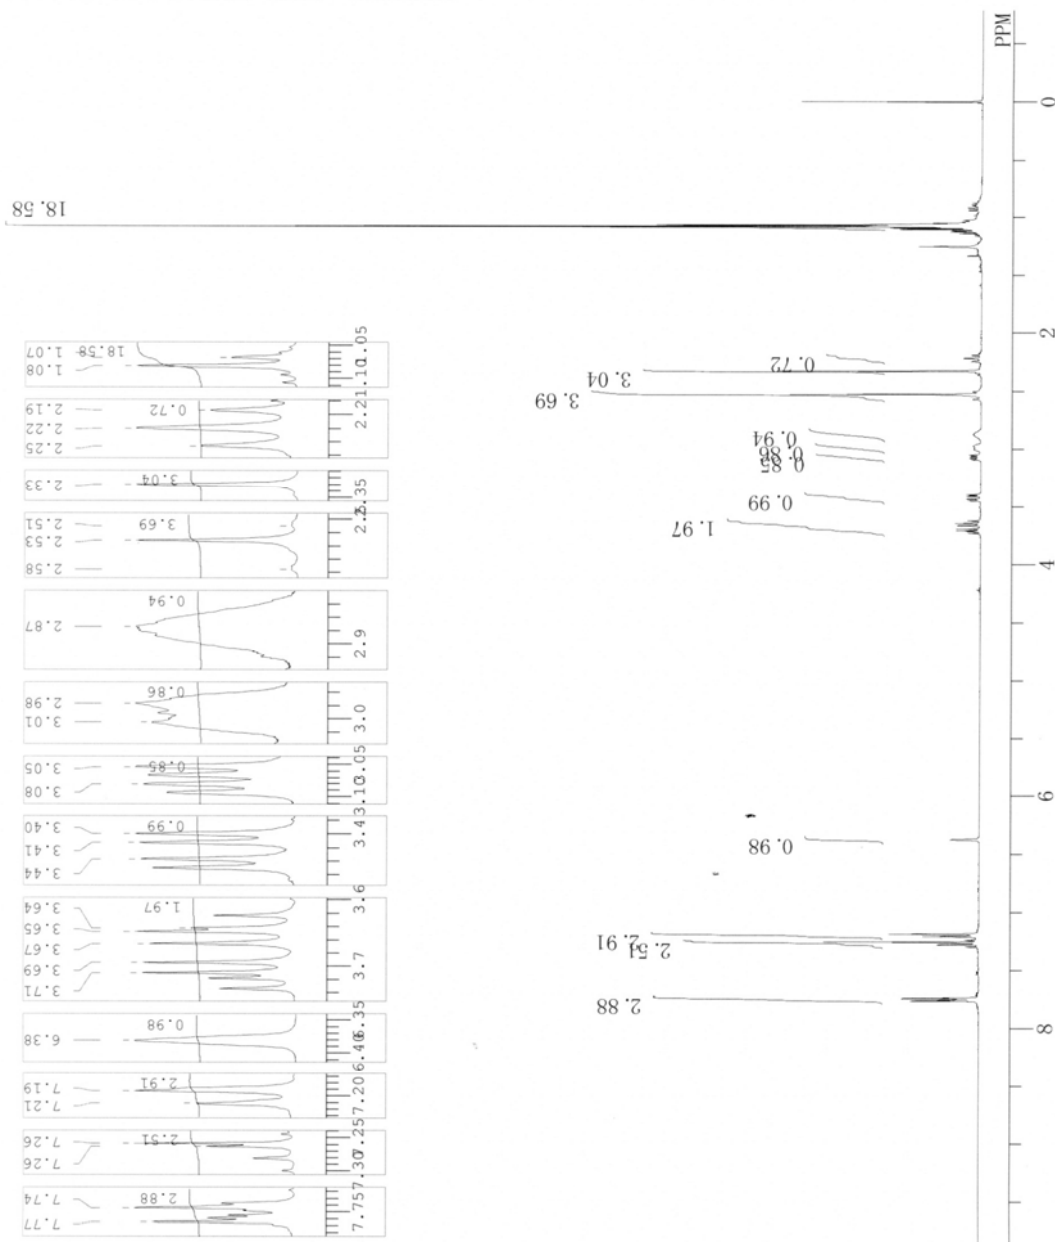

single pulse decoupled gated NOE

DFILE 1016D55 BCM 080131-1.als  
 COMNT single pulse decoupled gate  
 DATIM 31-01-2008 14:09:23  
 OBNUC <sup>13</sup>C  
 EXMOD single, pulse, dec  
 OBFRQ 125.77 MHz  
 OBSET 7.87 KHz  
 OBFIN 4.21 Hz  
 POINT 26214  
 FREQU 31446.06 Hz  
 SCANS 300  
 ACQTM 0.8336 sec  
 PD 2.0000 sec  
 PW1 3.83 usec  
 IRNUC <sup>1</sup>H  
 CTEMP 28.1 c  
 SLVNT CDCL3  
 EXREF 77.00 ppm  
 BF 0.12 Hz  
 RGAIN 60

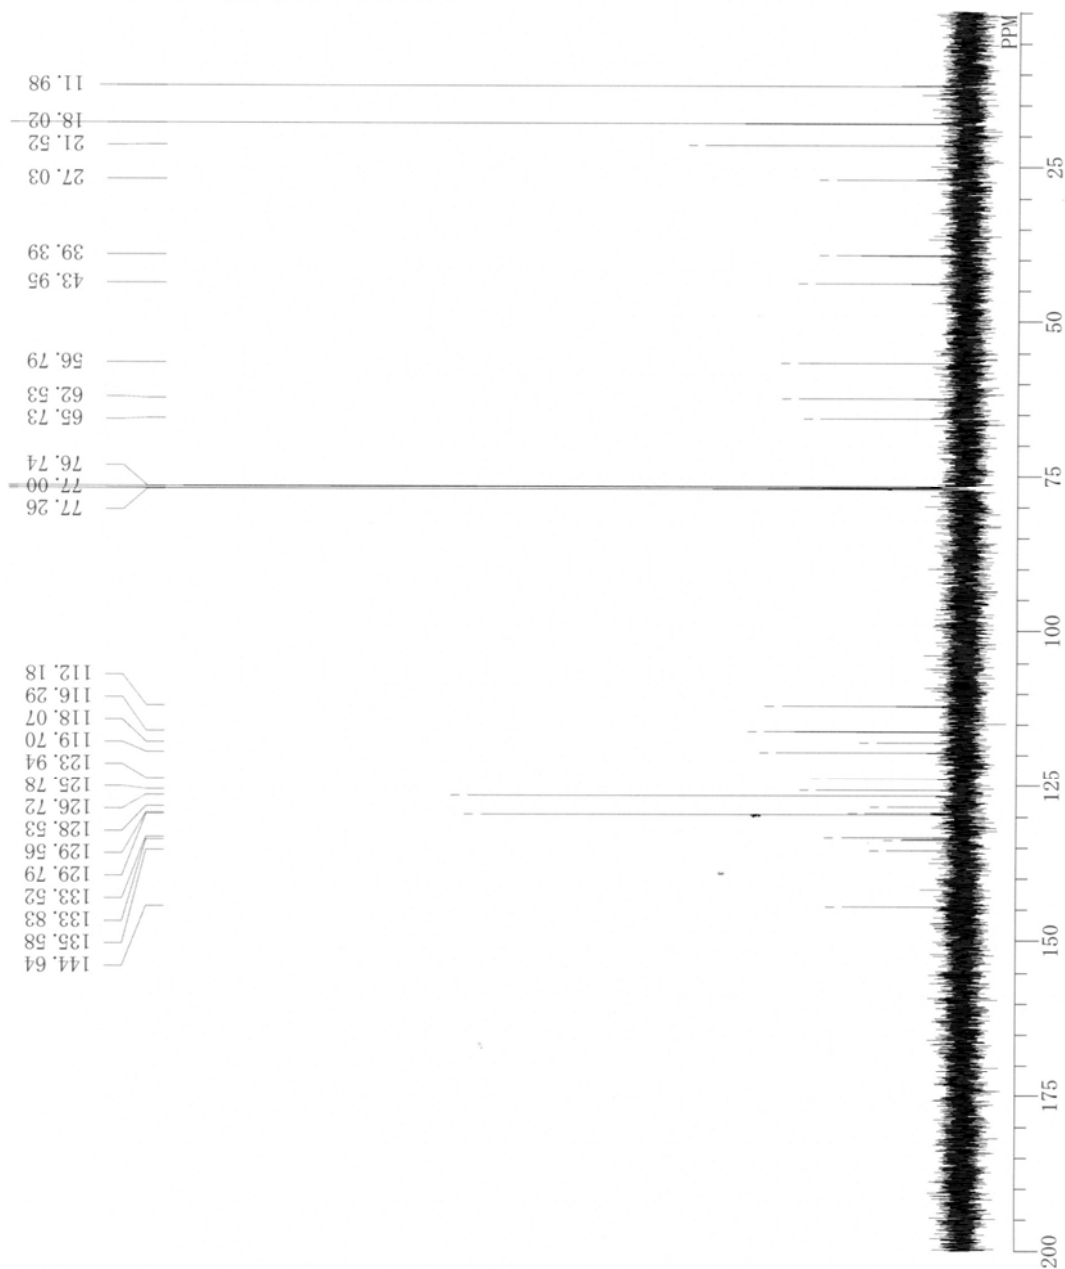

single\_pulse

DFILE 1016C166 080204-1.als  
 COMNT single\_pulse  
 DATIM 04-02-2008 11:36:34  
 OBNUC 1H  
 EXMOD single\_pulse.ex2  
 OBFREQ 500.16 MHz  
 OBSFET 2.41 KHz  
 OBFIN 6.01 Hz  
 POINT 13107  
 FREQU 7507.39 Hz  
 SCANS 8  
 ACQTM 1.7459 sec  
 PD 5.0000 sec  
 PW1 6.05 usec  
 IRNUC 1H  
 CTEMP 25.4 c  
 SLVNT CDCl3  
 EXREF 0.00 ppm  
 BF 0.12 Hz  
 RGAIN 44

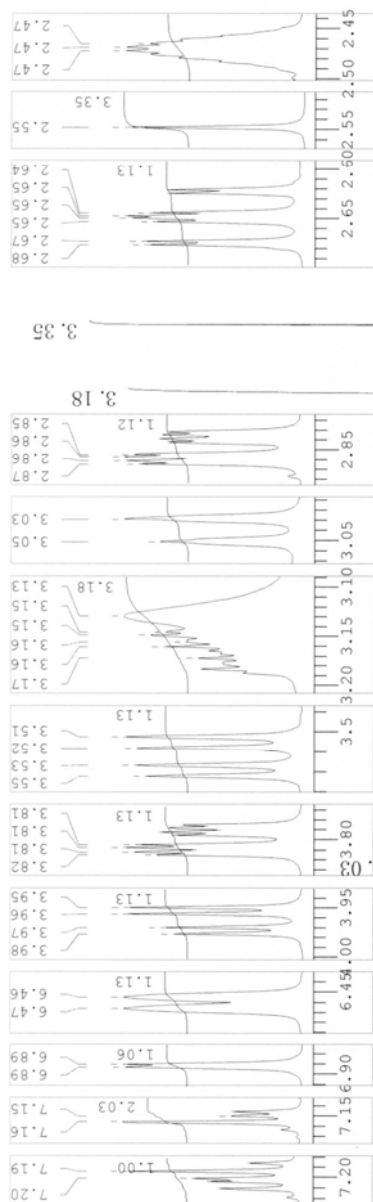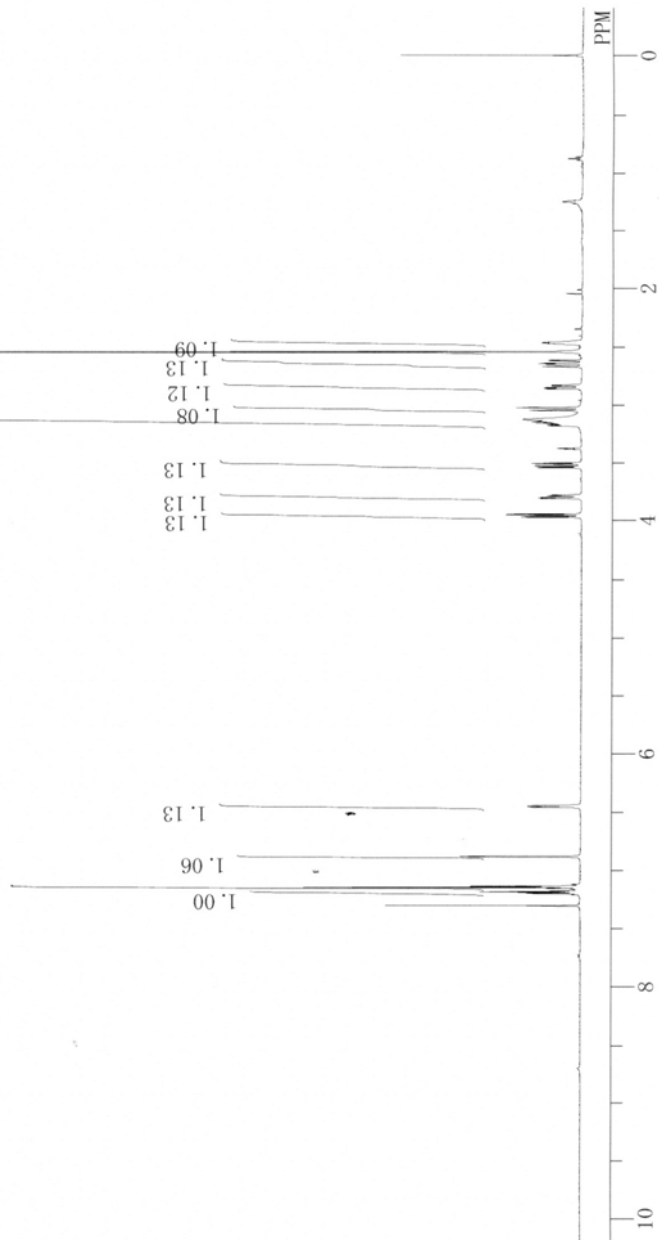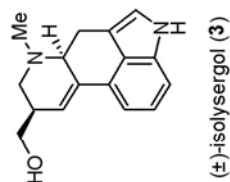

single pulse decoupled gated NOE

DFILE 1016C166 080204 BCM-1.als  
 COMNT single pulse decoupled gate  
 DATIM 04-02-2008 12:24:33  
 OBNUC 13C  
 EXMOD single\_pulse\_dec  
 OBFRQ 125.77 MHz  
 OBSST 7.87 KHz  
 OBFIN 4.21 Hz  
 POINT 26214  
 FREQU 31446.06 Hz  
 SCANS 1000  
 ACQTM 0.8336 sec  
 PD 2.0000 sec  
 PW1 3.83 usec  
 1H  
 IRNUC 1H  
 CTEMP 25.7 c  
 SLVNT CDCL3  
 EXREF 77.00 ppm  
 BF 0.12 Hz  
 RGAIN 58

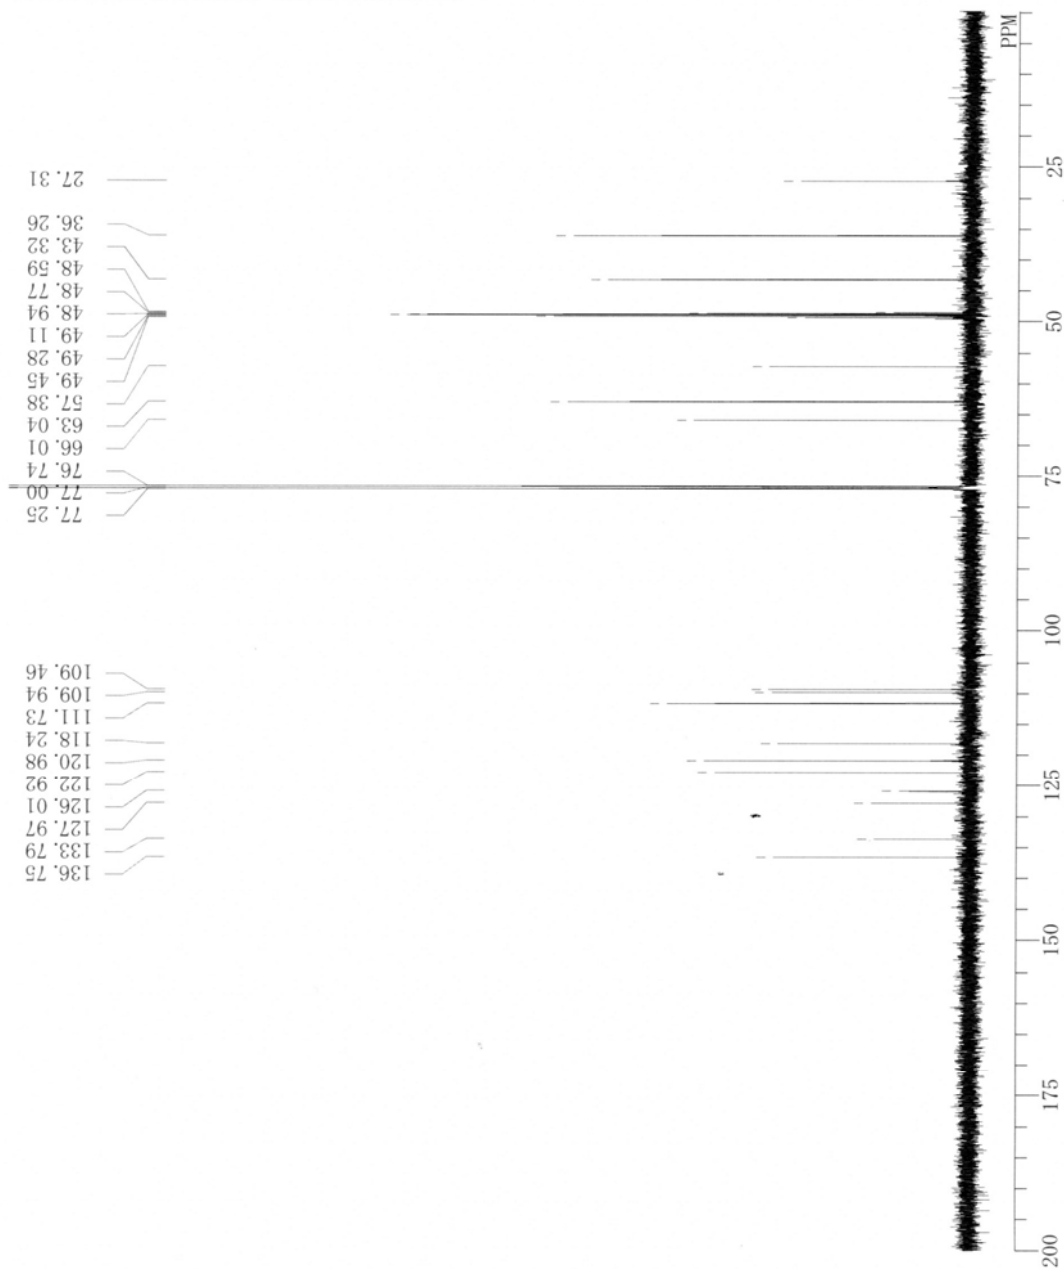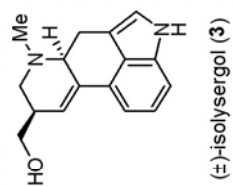

single\_pulse

DFILE 1016C159e 080626 550-100-1.  
 COMNT single\_pulse  
 DATIM 26-06-2008 22:13:14  
 OBNUC 1H  
 EXMOD single\_pulse.ex2  
 OBRFQ 500.16 MHz  
 OBSET 2.41 KHz  
 OBFIN 6.01 Hz  
 POINT 13107  
 FREQU 7507.39 Hz  
 SCANS 8  
 ACQTM 1.7459 sec  
 PD 5.0000 sec  
 PW1 6.05 usec  
 IRNUC 1H  
 CTMP 21.5 c  
 SLVNT CDCl3  
 EXREF 0.00 ppm  
 BF 0.12 Hz  
 RGAIN 50

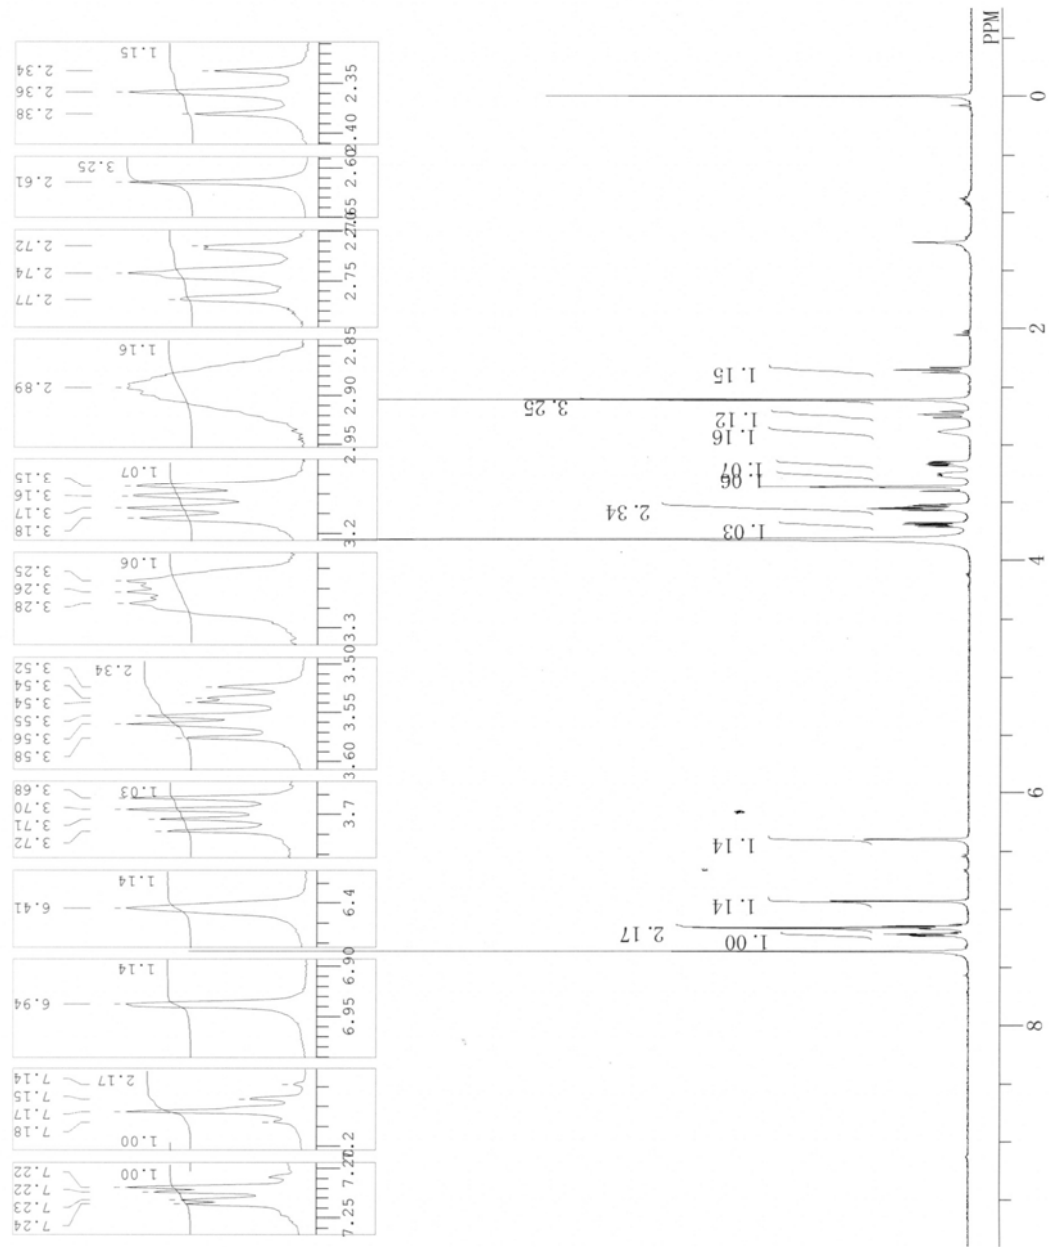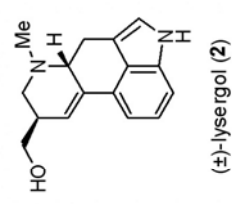



single pulse decoupled gated NOE

DFILE 1016C159c BCM 550-100-1.als  
 COMNT single pulse decoupled gate  
 DATIM 05-06-2008 09:09:10  
 OBNUC <sup>13</sup>C  
 EXMOD single\_pulse\_dec  
 OBFREQ 125.77 MHz  
 OBSFREQ 7.87 KHz  
 OBSFREQ 4.21 Hz  
 POINT 26214  
 FREQU 31446.06 Hz  
 SCANS 12000  
 ACQTM 0.8336 sec  
 PD 2.0000 sec  
 PW1 3.83 usec  
 IIRNUC <sup>1</sup>H  
 CTMP 26.8 c  
 SLVNT CDCl<sub>3</sub>  
 EXREF 77.00 ppm  
 BF 0.12 Hz  
 RGAIN 60

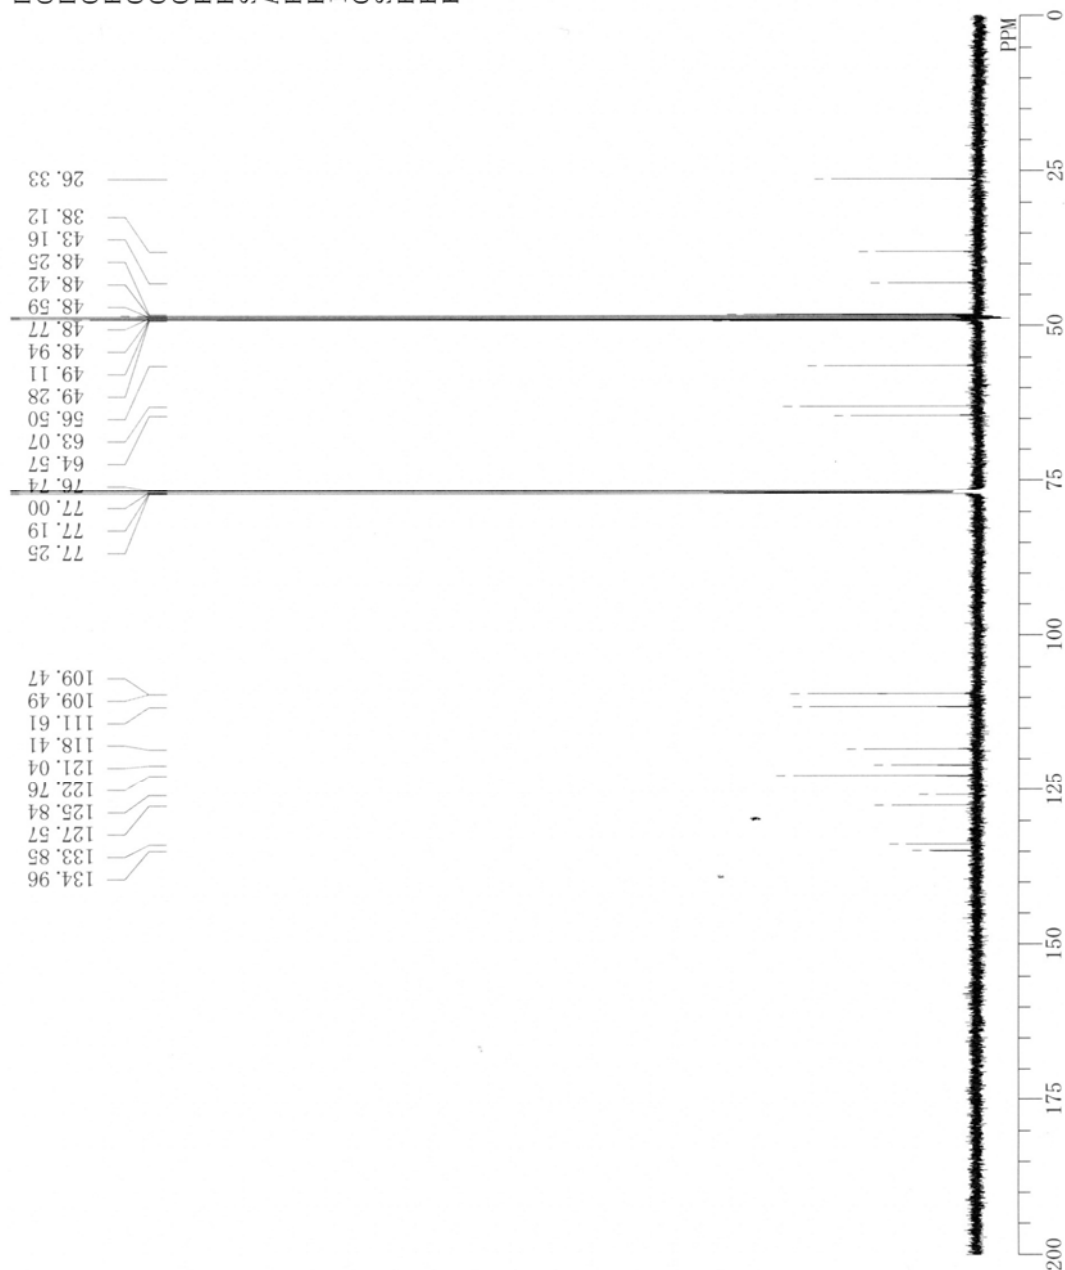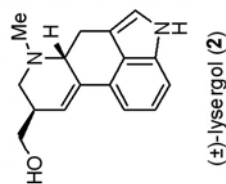

single\_pulse

DF1E 1016D139-1 080318-1. als  
 COMNT single\_pulse  
 DATIM 18-03-2008 10:52:09  
 OBNUC 1H  
 EXMOD single\_pulse.ex2  
 OBFREQ 500.16 MHz  
 OBSET 2.41 KHz  
 OBFIN 6.01 Hz  
 POINT 13107  
 FREQU 7507.39 Hz  
 SCANS 8  
 ACQTM 1.7459 sec  
 PD 5.0000 sec  
 PW1 6.05 usec  
 IRNUC 1H  
 CTEMP 26.0 c  
 SLVNT CDCl3  
 EXREF 0.00 ppm  
 BF 0.12 Hz  
 RGAIN 42

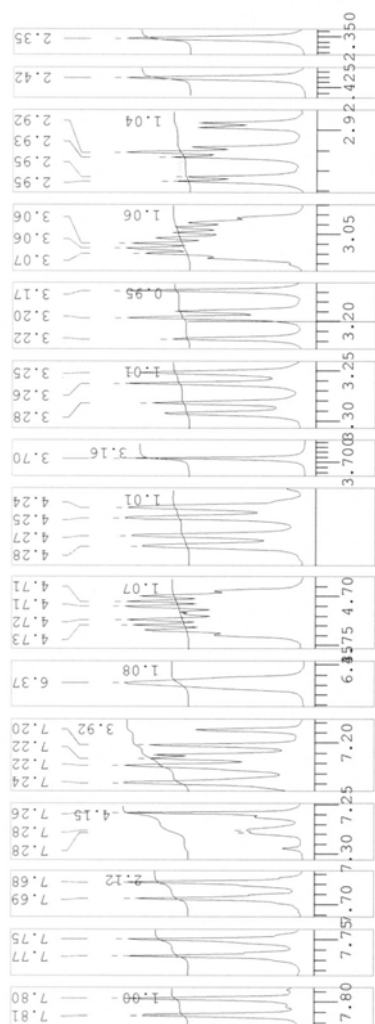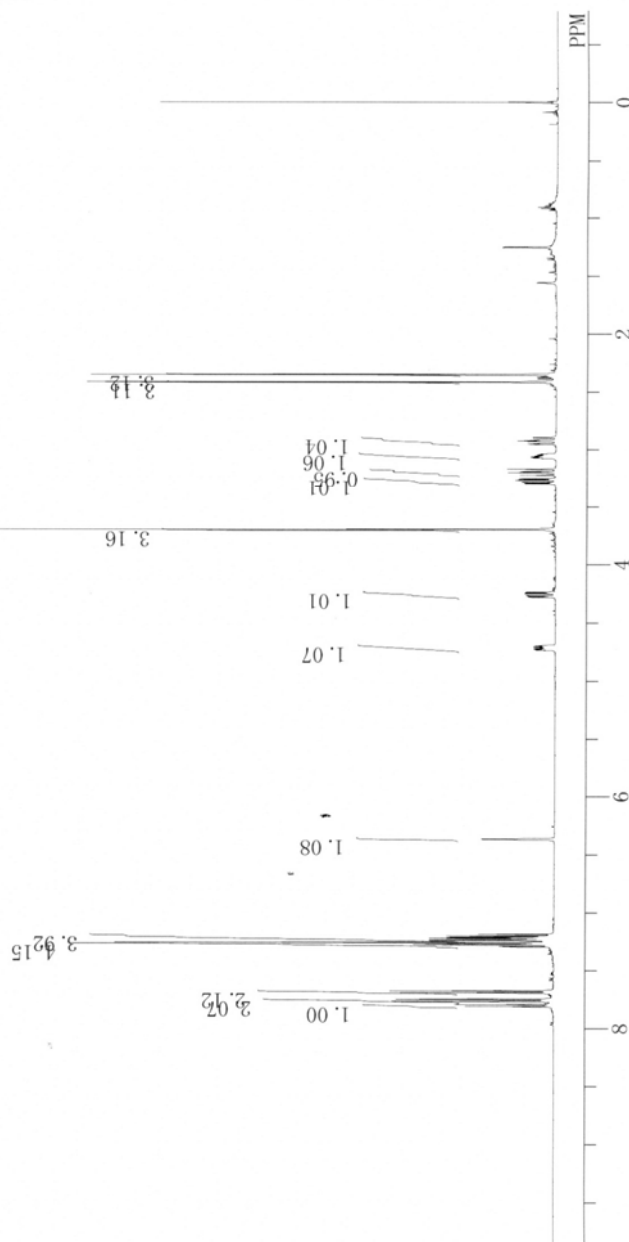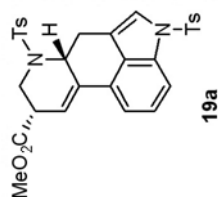

single pulse decoupled gated NOE

DFILE 1016D139-1 BCM 080318-1.als  
 COMNT single pulse decoupled gate  
 DATIM 18-03-2008 11:46:19  
 OBNUC 13C  
 EXMOD single\_pulse\_dec  
 OBFREQ 125.77 MHz  
 OBSET 7.87 KHz  
 OBFIN 4.21 Hz  
 POINT 26214  
 FREQU 31446.06 Hz  
 SCANS 800  
 ACQTM 0.8336 sec  
 PD 2.0000 sec  
 PW1 3.83 usec  
 IRNUC 1H  
 CTEMP 26.3 c  
 SLVNT CDCL3  
 EXREF 77.00 ppm  
 BF 0.12 Hz  
 RGAIN 60

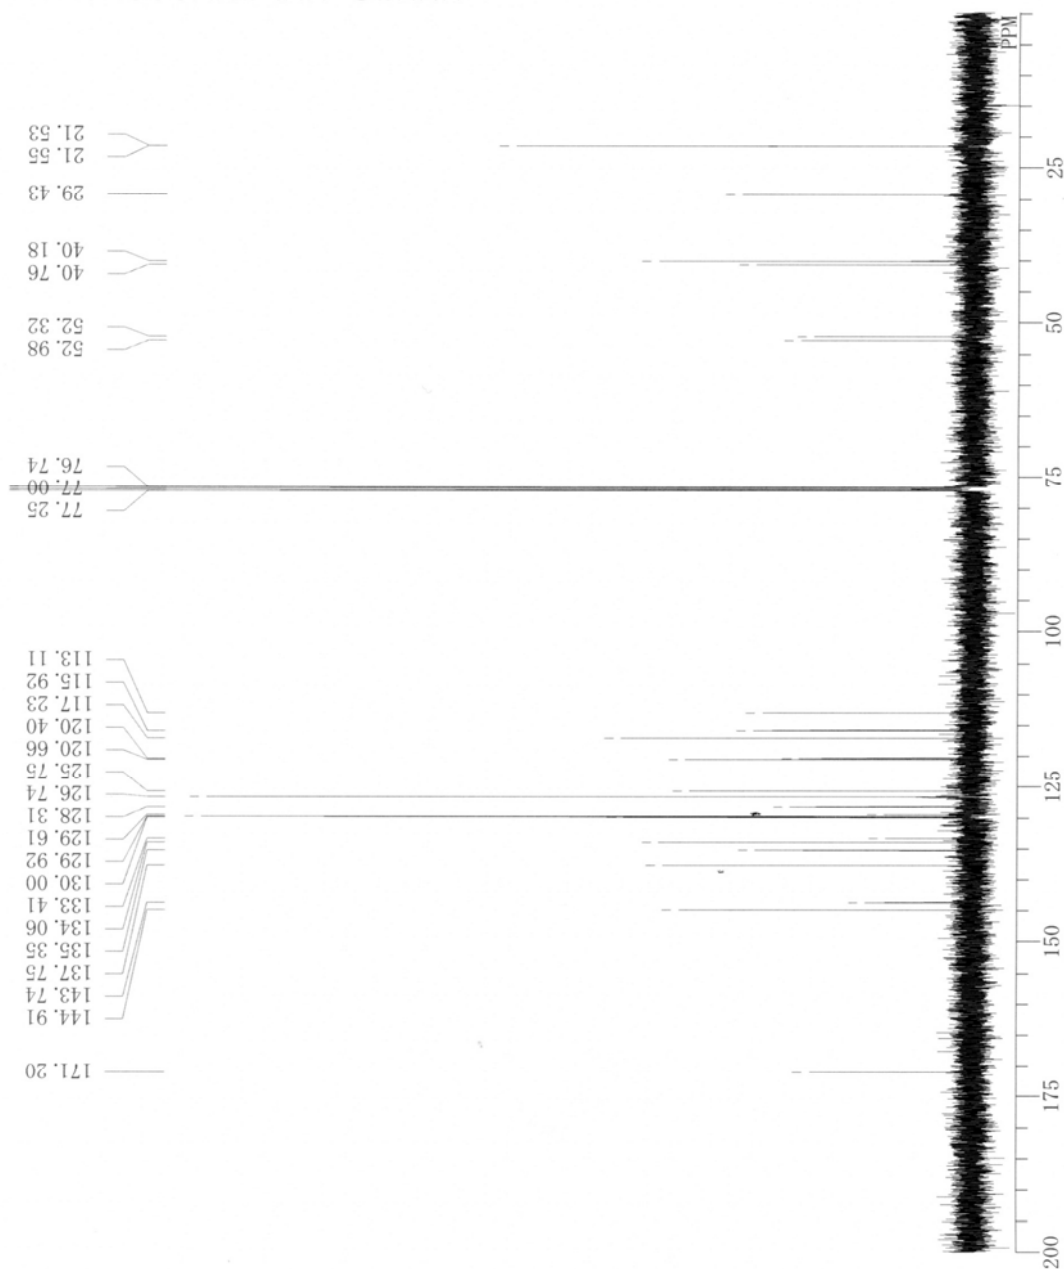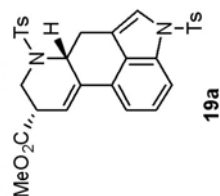

DFILE 1016D166 080715a.als  
 COMNT  
 DATIM Tue Jul 15 23:37:41 2008  
 OBNUC 1H  
 EXMOD NON  
 OBRFQ 399.65 MHz  
 OBSFQ 124.00 KHz  
 OBFIN 10500.00 Hz  
 POINT 32768  
 FREQU 7992.01 Hz  
 SCANS 8  
 ACQTM 4.1001 sec  
 PD 2.9000 sec  
 PW1 5.50 usec  
 IRNUC 1H  
 CTEMP 22.9 c  
 SLVNT CDCl3  
 EXREF 0.00 ppm  
 BF 0.12 Hz  
 RGAIN 23

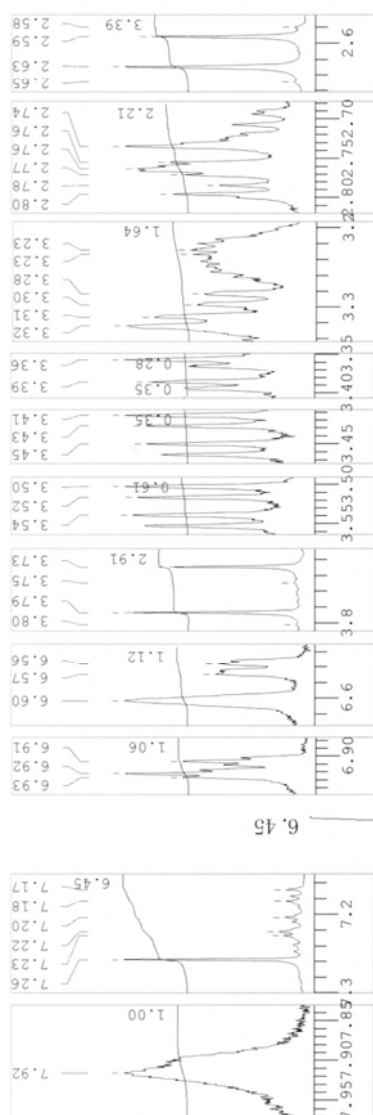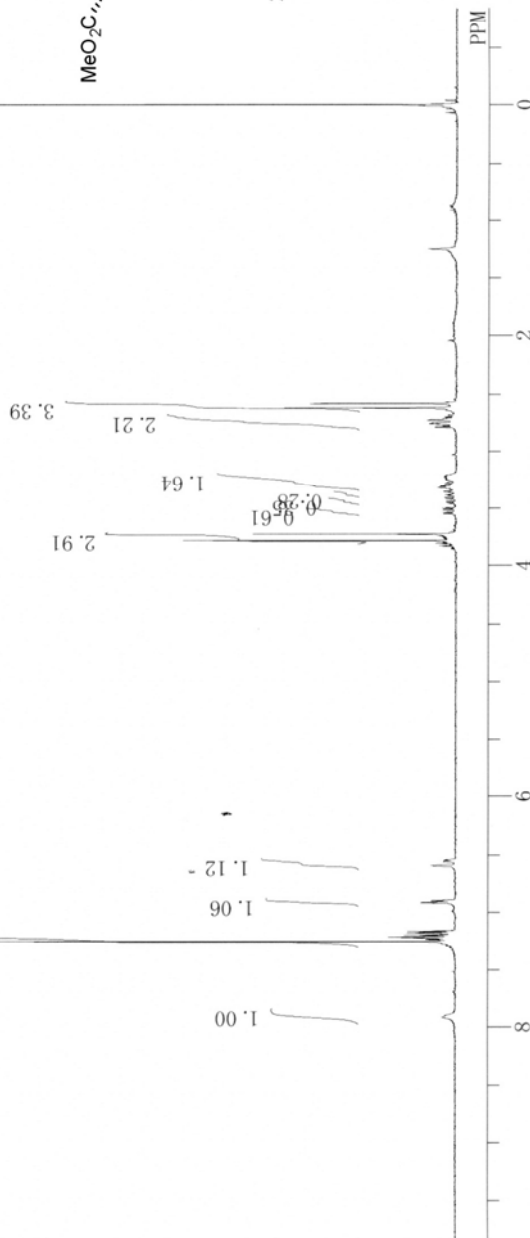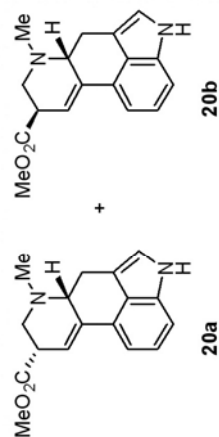

20b

single pulse decoupled gated NOE

DFILE 1016E10 080706 BCM-1.als  
 COMNT single pulse decoupled gate  
 DATIM 06-07-2008 17:07:38  
 OBNUC <sup>13</sup>C  
 EXMOD single\_pulse\_dec  
 OBFREQ 125.77 MHz  
 OBSET 7.87 kHz  
 OBFIN 4.21 Hz  
 POINT 26214  
 FREQU 31446.06 Hz  
 SCANS 1600  
 ACQTM 0.8336 sec  
 PD 2.0000 sec  
 PW1 3.83 usec  
 IIRNUC <sup>1</sup>H  
 CTEMP 24.3 c  
 SLVNT CDCl<sub>3</sub>  
 EXREF 77.00 ppm  
 BF 0.12 Hz  
 RGAIN 58

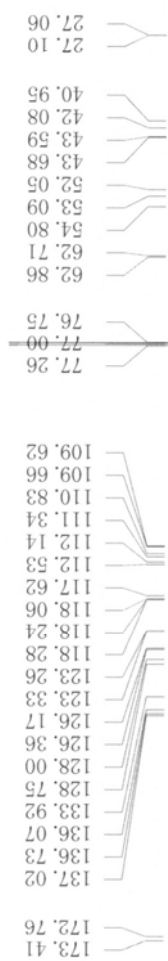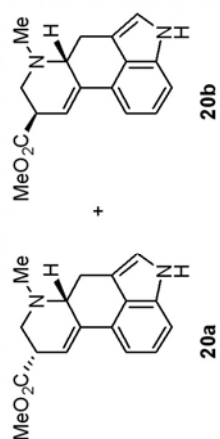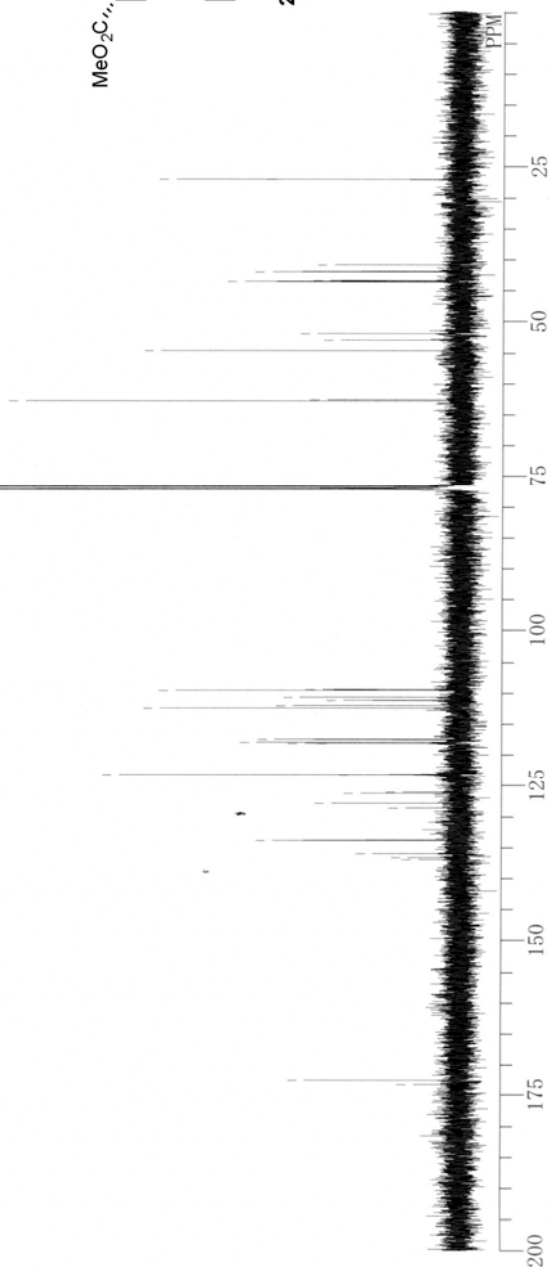

single\_pulse

DFILE 1016E23-2a pyridine-1.als  
 COMNT single\_pulse  
 DATIM 12-07-2008 15:55:15  
 OBNUC 1H  
 EXMOD single\_pulse.ex2  
 OBRFQ 500.16 MHz  
 OBSET 2.41 KHz  
 OBFIN 6.01 Hz  
 POINT 13107  
 FREQU 7507.39 Hz  
 SCANS 32  
 ACQTM 1.7459 sec  
 PD 5.0000 sec  
 PW1 6.05 usec  
 IRNUC 1H  
 CTEMP 24.8 c  
 SLVNT C5D5N  
 EXREF 0.00 ppm  
 BF 0.12 Hz  
 RGAIN 48

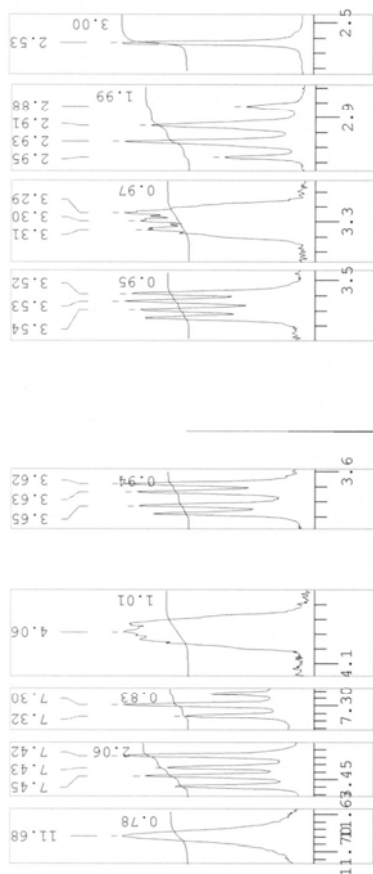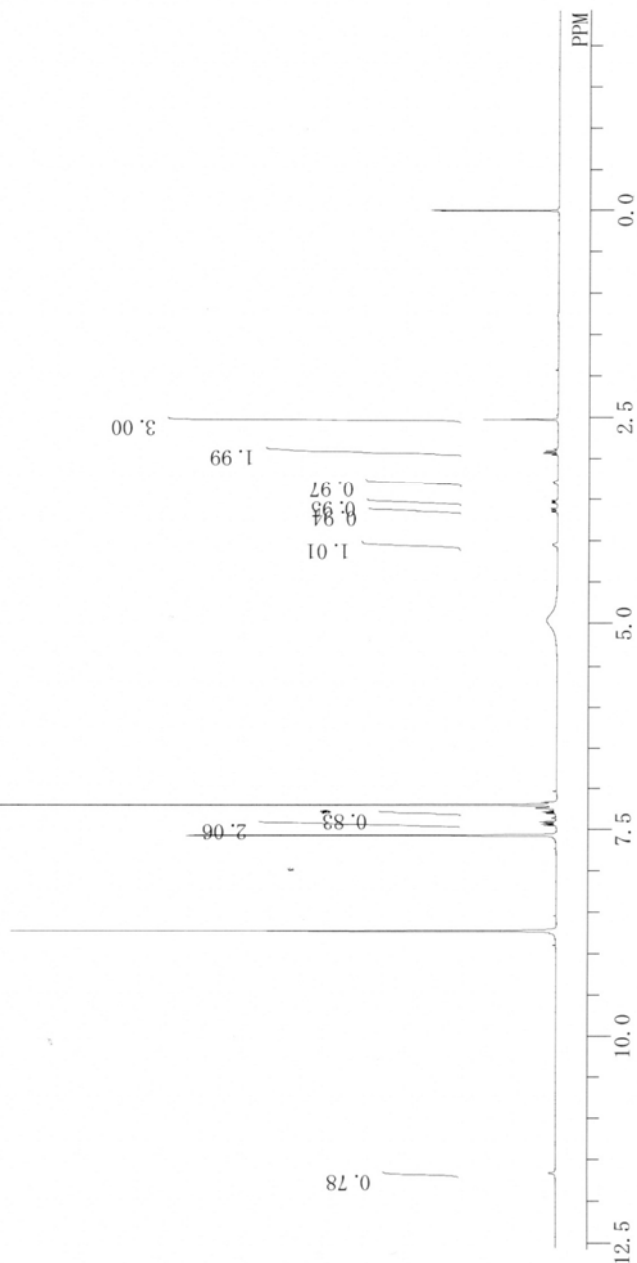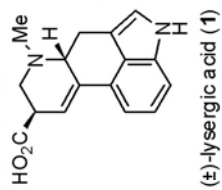

single pulse decoupled gated NOE

DFILE 1016E23-2 pyridine 080712 B  
 COMNT single pulse decoupled gate  
 DATIM 13-07-2008 00:23:45  
 OBNUC 13C  
 EXMOD single\_pulse\_dec  
 OBFREQ 125.77 MHz  
 OBFSET 7.87 KHz  
 OBFIN 4.21 Hz  
 POINT 26214  
 FREQU 31446.06 Hz  
 SCANS 2000  
 ACQTM 0.8336 sec  
 PD 2.0000 sec  
 PW1 3.83 usec  
 IRNUC 1H  
 CTEMP 23.8 c  
 SLVNT C5D5N  
 EXREF 123.50 ppm  
 BF 0.12 Hz  
 RGAIN 58

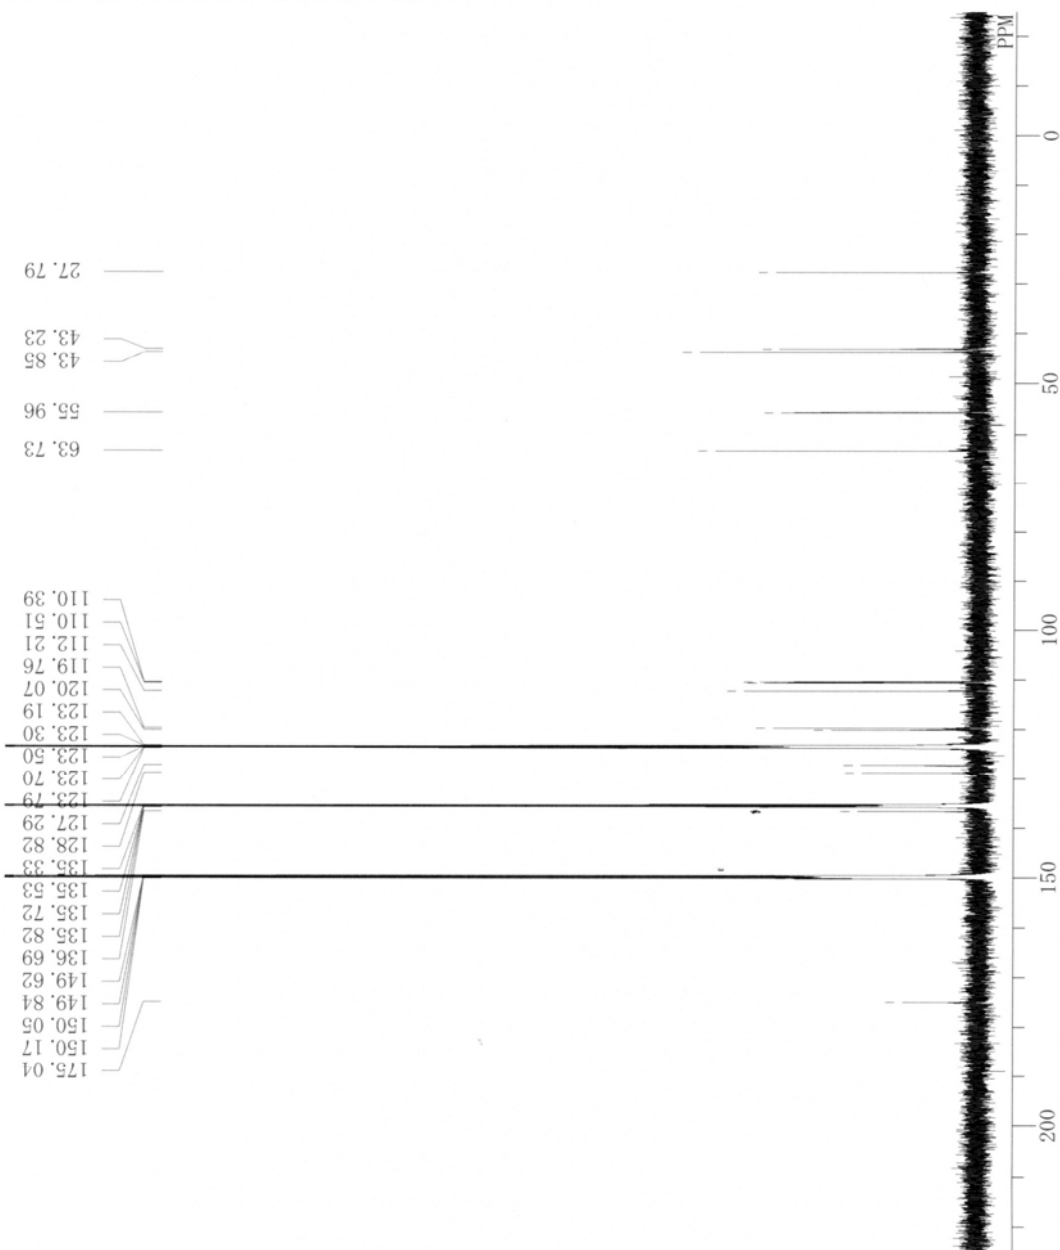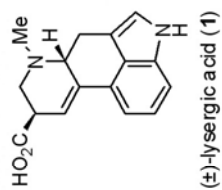

Supplement: Supplementary file 1 [file 4324660]
